# Supplementary material for: Single cell RNA sequencing reveals hemocyte heterogeneity in Biomphalaria glabrata: Plasticity over diversity
Source: Front Immunol. 2022 Sep 5;13:956871. doi: 10.3389/fimmu.2022.956871 (PMC9484523; doi:10.3389/fimmu.2022.956871)
Supplement: Supplementary file 4 [file Table_1.xlsx]

## Sheet: Feuille 1
Supplementary Table 1. Counting the proportions of the three different populations of circulating hemocytes from the hemolymph of 10 BgBRE2 individuals, approximately 9mm in diameter.
	Hyalinocytes	%	Granulocytes	%	Blast like cells	%	Total
Naive 1 (1st count)	89	58.17	20	13.1	44	28.8	153
Naive 1 (2nd count)	130	65	35	17.5	35	17.5	200
Mean count 1 and 2	109.5	61.58	27.5	15.29	39.5	23.13	176.5
Naive 2	81	60	18	13.3	36	26.7	135
Naive 3 (1st count)	64	45.39	34	24.1	43	30.5	141
Naive 3 (2nd count)	112	56	35	17.5	53	26.5	200
Mean count 1 and 2	88	50.7	34.5	20.81	48	28.5	170.5
Naive 4	172	78.9	18	8.26	28	12.8	218
Naive 5	230	71.21	29	8.98	64	19.8	323
Naive 6	180	73.47	29	11.8	36	14.7	245
Naive 7	138	75.41	19	10.4	26	14.2	183
Naive 8	162	74.31	26	11.9	30	13.8	218
Naive 9	37	49.33	11	14.7	27	36	75
Naive 10	72	72	7	7	21	21	100
Total	1269.5	66.69	219	12.25	355.5	21.06	1844
SD		9.03		3.021		6.01
	Hyalinocytes	Granulocytes	Blast-like cells
mean	66.6911	12.2474	21.0615
SD	9.03021	3.02064	6.00958
