# Supplementary material for: Single cell RNA sequencing reveals hemocyte heterogeneity in Biomphalaria glabrata: Plasticity over diversity
Source: Front Immunol. 2022 Sep 5;13:956871. doi: 10.3389/fimmu.2022.956871 (PMC9484523; doi:10.3389/fimmu.2022.956871)
Supplement: Supplementary file 5 [file Table_2.xlsx]

## Sheet: Feuil1
Supplementary Table 2.
The first sheet of the table represents the complete list of marker genes (P_value_adj < 0.05) of each cluster defined by the Seurat package. The second sheet of the table represents the five specific marker genes, defined in order to build a transcriptomic identity map of each cluster. The third sheet of the table represents the list of Biomphalaria mitochondrial genes.

## Sheet: Marker genescluster
gene	p_value	avg_log2FC	pct.1	pct.2	p_val_adj	cluster	TPM by cluster	Predicted function			gene	p_value	avg_log2FC	pct.1	pct.2	p_val_adj	cluster	TPM by cluster	Predicted function			gene	p_value	avg_log2FC	pct.1	pct.2	p_val_adj	cluster	TPM by cluster	Predicted function			gene	p_value	avg_log2FC	pct.1	pct.2	p_val_adj	cluster	TPM by cluster	Predicted function			gene	p_value	avg_log2FC	pct.1	pct.2	p_val_adj
BGLB006801	2.22574548923723e-192	2.07476941864691	1	0.486	3.76729681508294E-188	0	49.8434542064862	atrial natriuretic peptide-converting enzyme-like ; Neurotrypsin			BGLB020262	0	5.66910651151446	0.976	0.013	0	1	52.5373261409513	transmembrane 97-like			BGLB035410	1.07468834827851e-203	1.98522311056074	0.547	0.009	1.8190174982962e-199	2	3.05574088559604	PREDICTED: vitellogenin-like			BGLB033286	0	5.24992483757475	0.934	0.018	0	3	39.6697615762702	#N/A			BGLB022549	3.94586501053113e-141	1.04043226784114	0.622	0.024	6.67877111682499e-137
BGLB013154	2.10297712597121e-184	1.88211448091335	1	0.742	3.55949908341887E-180	0	450.657462445435	stanniocalcin family			BGLB022517	0	5.4307025432234	0.964	0.01	0	1	44.0951738162341	#N/A			BGLB034757	1.86858830996106e-162	4.37711226063252	0.753	0.065	3.1627725734401e-158	2	27.9513815850509	apolipophorins-like isoform X1			BGLB033224	0	5.14609969126262	0.978	0.02	0	3	37.7318861205271	PREDICTED: uncharacterized protein LOC106065593 isoform X1			BGLB008214	5.31285848381428e-129	0.676231107671196	0.451	0.01	8.99254426970406e-125
BGLB025025	3.992917695293e-178	1.88508130459515	1	0.425	6.75841249105293E-174	0	32.0420957007505	PREDICTED: uncharacterized protein LOC106073816			BGLB027140	0	3.8588465478716	0.893	0.004	0	1	13.645015261547	histone chaperone RTT106-like			BGLB003816	4.39695328966919e-161	3.40513322934459	0.46	0.01	7.44228313809407e-157	2	9.74726558805166	proteoglycan 4-like			BGLB038145	0	3.78685928521257	0.813	0.005	0	3	13.010957248598	PREDICTED: uncharacterized protein LOC106055718			BGLB013907	9.68437270298585e-129	0.963960552423592	0.537	0.018	1.63917692370739e-124
BGLB023479	1.15260913877706e-176	2.09806408445844	1	0.636	1.95090622829405E-172	0	166.755917242672	cystatin-A			BGLB021706	0	3.85448842491797	0.869	0.004	0	1	13.6922648960519	PREDICTED: uncharacterized protein LOC106059532, partial			BGLB036764	1.98358933881282e-114	1.71469956374107	0.393	0.015	3.35742331487458e-110	2	2.41434668017383	#N/A			BGLB021381	0	3.21174816472552	0.824	0.006	0	3	8.35636949138484	#N/A			BGLB030314	7.55171440582011e-127	0.575282626828982	0.341	0.003	1.27820318032911e-122
BGLB000090	4.82112491848671e-172	1.70261306749072	1	0.458	8.1602360370306E-168	0	30.0584177419139	bactericidal permeability-increasing -like			BGLB031029	0	3.28384865343543	0.863	0.003	0	1	8.78630747281115	basement membrane-specific heparan sulfate proteoglycan core protein isoform X16			BGLB029853	1.53859935469815e-107	1.62294782263419	0.4	0.019	2.6042332677621e-103	2	2.23315593787333	Ceramide-1-phosphate transfer			BGLB028491	4.93363613744855e-306	3.30545917513015	0.802	0.009	8.35067252624541e-302	3	9.18406094573042	G-type lectin S-receptor-like serine threonine- kinase At5g35370			BGLB020194	1.14753503250297e-112	1.22631782428661	0.732	0.054	1.94231779601452e-108
BGLB034510	1.71647477436755e-169	1.7362770553337	0.995	0.324	2.90530520309451E-165	0	13.4266048784323	epithelial membrane 1-like			BGLB026392	1.64326076488332e-301	2.70333650403725	0.69	0.004	2.78138317064151e-297	1	5.5701711570034	blastula protease 10-like			BGLB025987	2.93777257154716e-98	2.81749758948316	0.68	0.112	4.97247385460073e-94	2	7.3281770510101	platelet endothelial aggregation receptor 1-like			BGLB023375	2.22205557976093e-280	2.56660725016207	0.67	0.004	3.76105127430335e-276	3	4.95302252993198	#N/A			BGLB010383	4.72351758493044e-99	3.83367477781616	0.659	0.051	7.99502586425327e-95
BGLB016521	7.87960588908375e-169	1.88068862252549	0.989	0.317	1.33370209278632E-164	0	16.2190779165358	alpha-1-inhibitor 3-like isoform X2; alpha-1-inhibitor 3-like isoform X1			BGLB014033	2.52214043719872e-288	2.13840679826034	0.637	0.001	4.26897490400255e-284	1	3.41037103467248	transient receptor potential cation channel subfamily M member 5-			BGLB031191	1.15948673896295e-88	1.70046969396489	0.527	0.053	1.96254725436869e-84	2	4.29561994309894	Proline-rich transmembrane 1			BGLB023111	1.76471839076268e-271	3.36056308171054	0.747	0.01	2.98696234820491e-267	3	9.45588633387582	PREDICTED: uncharacterized protein LOC106075472 isoform X2			BGLB027864	6.23719017806073e-88	0.79682477497167	0.463	0.024	1.05570680953856e-83
BGLB030407	1.87644020550772e-165	1.73185025134113	0.999	0.524	3.17606269184236E-161	0	46.5642209530482	Macrophage migration inhibitory factor homolog			BGLB018039	5.71730731379547e-277	2.38780753376386	0.685	0.008	9.67711435933022e-273	1	4.49510814591431	multiple epidermal growth factor-like domains protein 11			BGLB017098	5.90358723241787e-83	2.76756736703665	0.467	0.047	9.99241174959049e-79	2	7.38006227348634	zinc metallo ase nas-13-like			BGLB029365	1.39853925738811e-256	3.94114289622809	0.78	0.015	2.36716754705511e-252	3	14.9857563260298	multiple epidermal growth factor-like domains protein 10			BGLB001951	1.47182210432803e-83	0.770576575869577	0.488	0.029	2.49120609378562e-79
BGLB019196	2.25965211348144e-165	1.92870198076735	1	0.542	3.82468716727868E-161	0	200.030589051259	cartilage matrix -like			BGLB026492	3.91668048095489e-269	2.68631108917069	0.804	0.026	6.62937338206424e-265	1	6.09727626724894	PREDICTED: uncharacterized protein LOC106066911 isoform X1			BGLB022619	8.45837885156517e-82	2.98770459213872	0.427	0.039	1.43166520441592e-77	2	7.90357250759713	threo-3-hydroxyaspartate ammonia-lyase-like			BGLB004842	3.10580838938012e-249	3.19836500922115	0.659	0.007	5.25689127986479e-245	3	8.32646078947451	caveolin-3			BGLB007121	6.31196498008511e-80	1.06459120704927	0.695	0.073	1.06836319252921e-75
BGLB035462	8.60050430855121e-163	1.62545237949475	0.98	0.315	1.45572135926538E-158	0	8.02719995453958	toll-like receptor 4			BGLB028784	5.4590381620341e-254	2.47571442973979	0.577	0.002	9.23996799305892e-250	1	4.60738946226519	Bg selectin 1			BGLB030828	1.28601712335498e-80	2.5867395625371	0.767	0.18	2.17671258299064e-76	2	12.7841029262092	PREDICTED: uncharacterized protein LOC106077476			BGLB025076	7.53610717433278e-245	2.58802603177163	0.604	0.004	1.27556150032757e-240	3	5.05418591208672	PREDICTED: uncharacterized protein LOC106059658			BGLB009707	6.15741956705174e-67	0.632644696607146	0.402	0.025	1.04220483591918e-62
BGLB010864	1.65607013344814e-162	2.17266438254489	0.986	0.58	2.80306430787432E-158	0	259.490711719027	myoglobin variant			BGLB016746	3.30584444711225e-245	3.46548578446921	0.81	0.039	5.5954723111822e-241	1	10.9364116295698	fibrinogen-related protein J1 precursor			BGLB035663	9.88465670333047e-76	2.15359957073025	0.32	0.02	1.67307699360572e-71	2	3.57259050397634	#N/A			BGLB024404	1.67274232761519e-243	2.35803704005122	0.593	0.004	2.83128366372146e-239	3	4.16206440727173	#N/A			BGLB010124	1.02646519163715e-59	1.19299392437438	0.732	0.117	1.73739498336504e-55
BGLB017695	5.84673229894384e-160	1.76898420420276	0.931	0.221	9.89617908919234E-156	0	6.86997340743075	MAM and LDL-receptor class A domain-containing 1-like			BGLB026984	6.88273644625175e-232	2.12190897283953	0.613	0.011	1.16497197089257e-227	1	3.51510176440662	transcription factor SPT20 homolog			BGLB026694	4.46738397018594e-75	2.00210444274761	0.327	0.021	7.56149410793672e-71	2	3.32380566842152	GTPase IMAP family member 7-like			BGLB013303	8.20879446434881e-231	3.03177617380455	0.582	0.005	1.38942055103568e-226	3	7.2511703024461	UPF0748 -like			BGLB039641	1.48780439439552e-58	1.24075891098854	0.854	0.168	2.51825771795385e-54
BGLB016522	6.53753145539724e-160	1.74789837543189	0.996	0.359	1.10654257414054E-155	0	16.4265276611357	#N/A			BGLB020794	4.13792808398774e-231	2.02218357027528	0.524	0.002	7.00385707495765e-227	1	3.07644739812833	#N/A			BGLB018640	2.74387184151535e-67	1.63930588546909	0.347	0.03	4.64427747894887e-63	2	2.24215846733708	multiple epidermal growth factor-like domains protein 10			BGLB008766	5.88528105139772e-225	4.82916739244105	0.692	0.014	9.96142670759579e-221	3	28.7313043244331	PREDICTED: uncharacterized protein LOC106069985			BGLB033284	8.51809662611598e-57	0.552306536549131	0.39	0.029	1.44177303493639e-52
BGLB027794	2.88332496903312e-157	1.686050532985	0.951	0.246	4.88031584258547E-153	0	6.93376286787124	fibrinogen C domain-containing protein 1-B-like			BGLB025885	7.66510341690776e-220	3.07771216305669	0.863	0.064	1.29739540434581e-215	1	8.92080680807171	#N/A			BGLB024295	5.01080934924659e-67	3.48176521180618	0.333	0.027	8.48129590453478e-63	2	10.8638998227217	PREDICTED: uncharacterized protein LOC106080264			BGLB028875	2.97709251453204e-224	2.51323631567722	0.527	0.002	5.03902679009694e-220	3	4.75793389227441	toll-like receptor 4			BGLB016332	1.23414037412669e-56	1.2818035662245	0.854	0.181	2.08890599724684e-52
BGLB022765	1.18656683880858e-142	1.48759572832277	0.97	0.272	2.00838303136741E-138	0	7.93173987852163	#N/A			BGLB013804	3.07546548573011e-219	3.31305616380039	0.964	0.081	5.20553288114679e-215	1	26.2727953539819	cathepsin B-like			BGLB028895	9.60432098244052e-66	1.65872893907422	0.453	0.062	1.62562736948788e-61	2	2.48508836330403	#N/A			BGLB022564	3.06181359964672e-213	2.51520385556092	0.495	0.002	5.18242569876204e-209	3	4.74349290197776	PREDICTED: uncharacterized protein LOC106068502			BGLB027730	6.72137652059406e-56	1.03925874685348	0.61	0.08	1.13766018987575e-51
BGLB006719	6.29498078930769e-142	1.62738077265457	0.901	0.253	1.06548844839822E-137	0	5.77974341762434	Krueppel-like factor 5			BGLB034083	2.62969349171481e-211	2.01930614817833	0.542	0.008	4.45101920407649e-207	1	3.13163750430233	#N/A			BGLB020152	1.05507289735458e-65	2.23413892485858	0.653	0.163	1.78581638606236e-61	2	5.30059660511878	#N/A			BGLB018461	9.5155118613209e-207	3.07439342086864	0.56	0.007	1.61059553764718e-202	3	7.51906521164535	#N/A			BGLB026592	5.04397435974657e-49	0.507524622897552	0.256	0.013	8.53743100130704e-45
BGLB017153	3.45493373954444e-141	1.63968522837223	0.979	0.338	5.84782084755292E-137	0	12.3500267456851	filamin-A-like isoform X1			BGLB000882	9.05901470355044e-205	2.54030540046705	0.631	0.022	1.53332882872295e-200	1	5.02779299284317	glutathione S-transferase-like			BGLB018074	5.76942584649956e-65	1.51021460579361	0.433	0.05	9.76533018778515e-61	2	2.93013493183385	T-cell leukemia homeobox 3			BGLB000225	7.10860884607144e-201	4.62512712048835	0.659	0.016	1.20320313328605e-196	3	24.7696907385239	Tumor necrosis factor ligand superfamily member 6			BGLB018713	1.04283850904103e-48	1.51533045816464	0.866	0.238	1.76510846040285e-44
BGLB031971	2.39371741841749e-140	2.44209638467893	0.855	0.195	4.05160610241345E-136	0	14.5357695136926	#N/A			BGLB023343	8.20827505857989e-201	2.56763796355029	0.893	0.077	1.38933263641523e-196	1	7.63218839445647	ceroid-lipofuscinosis neuronal 6			BGLB026957	1.11500715510367e-64	1.06882549851405	0.367	0.035	1.88726111072846e-60	2	1.28166137207471	TNF receptor-associated factor 4			BGLB036571	4.95635005411095e-193	2.29067003405158	0.571	0.01	8.3891181015882e-189	3	4.03395738775347	#N/A			BGLB038488	1.2596023042696e-47	1.59763035091455	0.951	0.335	2.13200286020672e-43
BGLB014448	1.40433189911617e-138	1.57821913819216	0.939	0.279	2.37697217244403E-134	0	6.77802501474842	von Willebrand factor type EGF and pentraxin domain-containing 1			BGLB022820	2.91193413522001e-178	1.48210607297138	0.423	0.003	4.92873971727339e-174	1	1.8035984249941	D(2) dopamine receptor-like isoform X1			BGLB035386	5.33265701804159e-61	1.59405310962568	0.26	0.016	9.0260552687372e-57	2	2.1651586734094	#N/A			BGLB030999	1.65186927075511e-191	3.54217127074649	0.901	0.051	2.79595392768011e-187	3	12.4083574598242	arf-GAP with Rho-GAP ANK repeat and PH domain-containing 2-like			BGLB011527	3.29074640290208e-46	0.520170842709372	0.378	0.035	5.56991736155206e-42
BGLB036557	2.16668678844127e-137	1.47365076249266	0.995	0.397	3.6673340581157E-133	0	15.4830748186451	C-type lectin domain family 4 member D			BGLB016939	1.85873749169869e-169	1.8002970995789	0.399	0.002	3.14609907844921e-165	1	2.50073056678771	G- coupled receptor 64-			BGLB029994	5.80133848530643e-58	4.45462735627296	0.633	0.17	9.81934552022966e-54	2	34.9221324727683	PREDICTED: uncharacterized protein LOC106074468			BGLB022969	1.39592853381688e-183	4.95514056573546	0.934	0.06	2.36274863633846e-179	3	51.549383377584	#N/A			BGLB004268	1.30326438545429e-44	0.404479024362719	0.305	0.022	2.20590529881993e-40
BGLB013250	7.20944628587398e-137	1.47155649627753	0.983	0.394	1.22027087834703E-132	0	10.9796138120819	alpha amylase 2			BGLB025803	1.40695012799726e-163	1.69050482821389	0.375	0.001	2.38140378664816e-159	1	2.23678616916138	perlucin-like protein			BGLB028972	1.08239184427331e-56	0.964431846825275	0.347	0.036	1.832056435617e-52	2	1.14985570855057	toll-like receptor 4			BGLB038076	7.45499661871785e-180	1.77521027561299	0.451	0.003	1.26183272768418e-175	3	2.45035101288686	claudin domain containing			BGLB032604	3.25424790497554e-39	0.923128723266465	0.451	0.061	5.5081400039616e-35
BGLB037382	7.98750375266005e-133	1.45066768611348	0.872	0.239	1.35196488517524E-128	0	3.97262021378783	FAM167B-like isoform X2			BGLB028116	1.93172439839015e-155	1.48621986433358	0.363	0.002	3.26963671671517e-151	1	1.8094779778288	#N/A			BGLB000840	2.25376049534368e-54	3.63274894590901	0.293	0.026	3.81471501441872e-50	2	14.0291156191915	peptidoglycan-recognition SC2-like			BGLB032363	2.00420441371945e-179	2.07662635736584	0.473	0.005	3.39231639066153e-175	3	3.25975371680469	PREDICTED: uncharacterized protein LOC106063845			BGLB012892	4.03223028721425e-38	0.486977324607236	0.329	0.032	6.82495298413883e-34
BGLB039248	1.28396980732983e-132	1.4219153414754	0.898	0.256	2.17324729588647E-128	0	4.50554180682481	cGMP-dependent kinase 1-like			BGLB004909	1.6041087812052e-147	2.22296636480606	0.798	0.09	2.71511452306791e-143	1	6.37693455951316	PREDICTED: uncharacterized protein LOC106060241			BGLB030356	2.00860972424094e-53	2.87702838180068	0.46	0.08	3.39977281925022e-49	2	12.3903244992486	#N/A			BGLB029318	1.4998953227682e-177	2.09165599657476	0.429	0.002	2.53872282331746e-173	3	3.32387815709049	#N/A			BGLB033708	8.63216076705338e-37	1.11069948246599	0.805	0.235	1.46107953143146e-32
BGLB003136	6.7278582431811e-132	1.41434288864101	1	0.51	1.13875728624083E-127	0	42.8757199187567	inter-alpha-trypsin inhibitor heavy chain H3-like			BGLB023766	1.33949650379533e-143	1.4326837424601	0.417	0.01	2.26723178232397e-139	1	1.76190139774183	TNF receptor-associated factor 4			BGLB036453	7.80285079180825e-53	0.870255025556003	0.307	0.029	1.32071052502146e-48	2	1.09527944972127	PREDICTED: uncharacterized protein LOC106061158			BGLB012422	4.7680055742368e-172	4.04733941540598	0.912	0.064	8.0703262349532e-168	3	20.9801508139584	cathepsin L1-like			BGLB029499	7.56891090197694e-35	0.305088656932501	0.293	0.027	1.28111385926862e-30
BGLB025237	5.11482035620727e-127	1.27266548659982	0.995	0.519	8.65734493491642E-123	0	14.8417035887049	glioma pathogenesis-related 1-like			BGLB034841	2.04837217260519e-143	1.2748104398504	0.363	0.004	3.46707473935154e-139	1	1.44023906637165	PREDICTED: uncharacterized protein LOC106062791			BGLB009640	2.884188216374e-52	3.19007195414429	0.48	0.093	4.88177697503464e-48	2	12.280236851735	GTPase IMAP family member 7-like			BGLB016855	4.55704415795453e-171	1.74939151451333	0.396	0.001	7.71325294175383e-167	3	2.37103922654516	PREDICTED: uncharacterized protein LOC106072108 isoform X1			BGLB010074	4.18955728750954e-34	1.05315487781521	0.805	0.245	7.09124466483864e-30
BGLB024597	1.72867240903929e-126	1.44233125258773	0.952	0.317	2.9259509195399E-122	0	8.79012900929291	#N/A			BGLB011935	4.31376525401326e-140	1.31074594197329	0.387	0.008	7.30147906894284e-136	1	1.51062066205984	potassium voltage-gated channel subfamily H member 7-like isoform X1; potassium voltage-gated channel subfamily H member 7-like isoform X2			BGLB029261	9.49989848556507e-51	3.03302966063819	0.293	0.03	1.60795281766674e-46	2	7.7389300082365	PREDICTED: uncharacterized protein LOC106062349			BGLB016572	2.90813508773241e-165	1.37894100460246	0.374	0.001	4.92230944949588e-161	3	1.60642603103333	paladin-like isoform X2			BGLB008703	6.62604177769203e-34	0.409182182392617	0.329	0.036	1.12152383129215e-29
BGLB037764	2.80171448886132e-124	1.42676357129699	0.875	0.265	4.74218194384667E-120	0	4.46687375315606	Alpha-tectorin ; balbiani ring protein 3-like			BGLB022082	2.46366686692576e-132	1.30757143586806	0.339	0.004	4.17000253895854e-128	1	1.49914837190328	toll-like receptor 4			BGLB026536	2.24739265776622e-49	2.1407632653992	0.34	0.044	3.80393681253511e-45	2	4.2688483463923	#N/A			BGLB039503	4.70029744491623e-162	1.74990856009373	0.429	0.004	7.95572345526521e-158	3	2.40932228734405	cell death abnormality 1-like			BGLB034811	1.68821911297718e-33	0.567477056064234	0.28	0.027	2.85747967062518e-29
BGLB000124	4.18817944345534e-124	1.37960959559693	0.991	0.434	7.08891252599252E-120	0	14.6612789597136	dual oxidase 2-like			BGLB017738	3.25718219681382e-131	1.36183025495677	0.321	0.003	5.51310658632708e-127	1	1.58119624874293	GATA-binding factor			BGLB022969	3.67676623735749e-47	1.47340445781261	0.433	0.072	6.22329453335129e-43	2	8.418981843747	#N/A			BGLB020217	3.1890425061723e-160	1.579869944933	0.363	0.001	5.39777334594724e-156	3	1.99234483025859	PREDICTED: uncharacterized protein LOC106051064			BGLB005557	2.53370021651813e-33	0.344348719967727	0.28	0.026	4.28854098647858e-29
BGLB000204	1.08229449402829e-121	1.43386941141023	0.91	0.225	1.83189166059228E-117	0	9.13641343711677	fibrinogen-related protein 3.2			BGLB031468	1.06698239465645e-127	1.0828039573437	0.286	0	1.80597440119552e-123	1	1.11909235402067	integrin alpha-4			BGLB032116	1.06003706866276e-46	1.6945256004936	0.327	0.042	1.79421874241859e-42	2	2.80660020463469	zinc metallo ase nas-15-like			BGLB035311	1.1127945368507e-156	1.82384269281227	0.451	0.007	1.88351603307349e-152	3	2.5740362930673	PREDICTED: uncharacterized protein LOC106058495, partial			BGLB025136	6.48359225648282e-33	0.314484179295502	0.305	0.031	1.09741282533228e-28
BGLB011792	3.31097302006422e-120	0.932354493551732	0.999	0.902	5.6041529337607E-116	0	28.5188997112969	Tropomyosin-1			BGLB035773	1.12395430728457e-127	1.16510411118377	0.292	0.001	1.90240506050986e-123	1	1.24422094077412	protein ZBED8-like			BGLB029270	2.06914567323926e-45	2.06882134756458	0.94	0.678	3.50223596652478e-41	2	25.1474922365655	PREDICTED: uncharacterized protein LOC106069423 isoform X2			BGLB037246	7.41630747649042e-153	2.39141595550953	0.626	0.024	1.25528420347077e-148	3	4.67763686380694	D(2) dopamine receptor-like isoform X1			BGLB009738	1.17641122358503e-32	0.328112902819634	0.256	0.022	1.99119363704002e-28
BGLB007673	2.52693730439266e-119	1.37248362813033	0.933	0.336	4.27709408141501E-115	0	5.92060060666127	collagen alpha-1(XVIII) chain-like			BGLB023327	3.38217626007739e-125	1.34090234861744	0.298	0.002	5.72467153780699e-121	1	1.53850668187348	toll-like receptor 4			BGLB039195	2.67448996157102e-45	0.878885857997912	0.253	0.023	4.52684170895511e-41	2	0.953716720656908	death domain-containing protein CRADD-like			BGLB023483	2.55833356517735e-152	1.68230275917351	0.374	0.002	4.33023539241919e-148	3	2.21894473908481	#N/A			BGLB009798	4.60654208469558e-32	0.496786932002303	0.402	0.058	7.79703313255574e-28
BGLB006108	3.26630745732241e-119	1.31079271606696	0.925	0.348	5.52855200226391E-115	0	5.41966990161395	5-aminolevulinate erythroid- mitochondrial-like isoform X1			BGLB028956	2.61914102132141e-118	2.5168795898533	0.47	0.028	4.43315809268861e-114	1	5.47061648946356	peroxisomal-coenzyme A synthetase			BGLB022475	4.10787052831051e-44	1.00331351731327	0.28	0.032	6.95298165621838e-40	2	1.10127748388587	organic solute transporter subunit alpha-like isoform X1			BGLB032476	3.56036701422104e-152	1.70041375568785	0.374	0.002	6.02627720827054e-148	3	2.26466349343718	#N/A			BGLB001029	5.21205232399869e-32	0.667033607290241	0.598	0.126	8.82191976360018e-28
BGLB002188	1.43518432275058e-118	1.1923240650273	0.87	0.256	2.42919298468763E-114	0	3.60314720015071	alkaline tissue-nonspecific isozyme-like			BGLB008848	2.18077786132767e-117	1.54966174276191	0.429	0.022	3.69118460808321e-113	1	2.04255874680181	#N/A			BGLB027762	4.84268490171831e-44	2.65377861527265	0.353	0.057	8.19672846464841e-40	2	5.77108656458719	#N/A			BGLB024149	1.89304320436543e-149	2.34726828424007	0.604	0.023	3.20416492770892e-145	3	4.32300218109733	smoothelin-like protein 1			BGLB005372	2.78433782592115e-31	0.370652742125998	0.293	0.031	4.71277020415413e-27
BGLB002080	9.16063863017981e-118	1.36576576231522	0.808	0.206	1.55052969454423E-113	0	3.27264196104042	failed axon connections homolog			BGLB025386	2.64511792927527e-111	2.94005980109014	0.97	0.408	4.47712660709132e-107	1	12.4214091983712	PREDICTED: uncharacterized protein LOC106075225			BGLB023053	2.78730837373124e-42	3.45699490853283	0.28	0.034	4.71779815337749e-38	2	11.2585660893555	C-type lectin domain family 3 member A-like isoform X2			BGLB029878	5.26714466697218e-149	1.59737991467605	0.44	0.007	8.91516906331711e-145	3	2.05231460226853	D(2) dopamine receptor-like isoform X1			BGLB038175	3.0425267134862e-31	1.51187936886628	1	0.724	5.14978071524674e-27
BGLB000171	2.99590575191453e-115	0.996075266426268	0.999	0.733	5.07087007569054E-111	0	16.0139667030524	dual oxidase maturation factor 1-like			BGLB037874	2.81147554882245e-111	1.0165383852573	0.256	0.001	4.75870351393688e-107	1	1.02561447650573	#N/A			BGLB020077	6.00906989472833e-42	1.32996744427544	0.347	0.054	1.01709517038172e-37	2	2.04877239427923	PREDICTED: uncharacterized protein LOC106071920			BGLB039416	3.71168442334164e-145	2.33140245456558	0.637	0.029	6.28239705494806e-141	3	4.29141592875082	Niemann-Pick C1			BGLB040220	1.66216128963977e-27	0.384233202894165	0.354	0.051	2.81337419884428e-23
BGLB019847	9.85664752952643e-114	1.35461519649964	0.946	0.387	1.66833616084764E-109	0	10.8750671665022	Fatty acid-binding protein, liver			BGLB035934	1.48870485374147e-108	0.953950844559189	0.25	0.001	2.51978183544281e-104	1	0.939530325534119	basement membrane-specific heparan sulfate proteoglycan core isoform X13			BGLB038538	1.09748996017032e-41	1.165290898866	0.433	0.084	1.85761150658429e-37	2	2.0190259772764	PREDICTED: uncharacterized protein LOC106061867			BGLB006938	1.9181786992351e-144	1.55381686859441	0.374	0.003	3.24670926632533e-140	3	1.95537652405002	cytochrome P450 3A24-like			BGLB026276	2.14104961132787e-26	0.38585558329171	0.305	0.04	3.62394057213356e-22
BGLB031629	8.09717339173516e-109	1.14758924781204	0.89	0.287	1.37052756828509E-104	0	4.80922874799752	#N/A			BGLB030957	1.5413258550166e-108	0.973207363571042	0.25	0.001	2.60884814220111e-104	1	0.965977044702254	#N/A			BGLB001741	4.93948932202276e-41	0.840621047867083	0.267	0.03	8.36057962645573e-37	2	0.90468781232822	zinc metallo ase nas-15-like; balbiani ring 3-like			BGLB024947	1.35373424821553e-140	2.37872801654022	0.692	0.039	2.29133058852961e-136	3	4.77090042866446	signal-transducing adaptor 1-like			BGLB033375	4.8919488502475e-26	0.686762951892788	0.573	0.139	8.28011262392892e-22
BGLB035129	3.28536863050381e-108	1.16824844880715	0.936	0.373	5.56081494399074E-104	0	5.39166491271247	receptor-type tyrosine- phosphatase T-like			BGLB016312	3.57473803337767e-108	2.60645441718294	0.679	0.106	6.05060159529504e-104	1	6.409382203623	PREDICTED: uncharacterized protein LOC106057491			BGLB028227	3.4893950513854e-40	1.51899506612276	0.407	0.083	5.90615006397493e-36	2	2.41176047541871	D(2) dopamine receptor A-like isoform X1			BGLB004464	1.65611723590564e-140	5.81113999792379	0.846	0.073	2.80314403349389e-136	3	77.4071077503177	cathepsin Z			BGLB016362	1.62929035800105e-25	0.501072252510413	0.317	0.045	2.75773685995257e-21
BGLB000661	3.43325111341064e-108	0.967448420074738	1	0.899	5.81112083455885E-104	0	32.9264739467518	Myophilin			BGLB024394	2.41021978015878e-107	1.61261390603913	0.423	0.025	4.07953799989676e-103	1	2.24117281780498	plexin-A2 isoform X1			BGLB035436	1.62187364767427e-39	2.42695571621132	0.32	0.051	2.74518333605346e-35	2	4.84456773819348	multiple epidermal growth factor-like domains protein 10			BGLB021179	9.1761423384707e-138	1.81408808135691	0.549	0.02	1.55315385220955e-133	3	2.61987573010684	PREDICTED: uncharacterized protein LOC106056443			BGLB035186	5.16340592533761e-25	0.416157569156885	0.402	0.071	8.73958086922644e-21
BGLB039813	9.5050366430713e-108	1.27091587123001	0.826	0.253	1.60882250220625E-103	0	3.42025317989078	C-type lectin galactose-binding isoform			BGLB021790	7.60758576493896e-105	4.10289052397465	0.964	0.441	1.28765996657357e-100	1	37.28614555084	probable glutathione S-transferase 7			BGLB000094	6.81807821316706e-39	1.6672289503439	0.373	0.07	1.15402791836066e-34	2	3.10780164126342	#N/A			BGLB020661	9.85132476554159e-133	1.51813005086923	0.363	0.004	1.66743522981557e-128	3	1.88122636254331	HRAS-like suppressor 3			BGLB019342	2.17448043788473e-24	0.809505478517196	0.72	0.234	3.68052558916369e-20
BGLB034515	1.26758103609907e-106	1.11089605748435	0.963	0.498	2.14550766170129E-102	0	6.17358404919532	integrin alpha-4-like			BGLB023351	8.95978398859638e-105	1.37166376876266	0.762	0.111	1.51653303790982e-100	1	4.63055737037779	CD63 antigen-like			BGLB037094	2.03560827663353e-37	1.14837822630059	0.413	0.09	3.44547056902991e-33	2	1.76689514095886	#N/A			BGLB021994	1.38310657579498e-130	1.67380708941322	0.407	0.008	2.34104619019059e-126	3	2.31780869380216	inter-alpha-trypsin inhibitor heavy chain H2			BGLB002683	4.87605119406969e-24	0.370419612209696	0.354	0.058	8.25320425108237e-20
BGLB023492	1.97167162916961e-106	1.15083338630337	0.841	0.27	3.33725139953249E-102	0	2.96817259838146	cholecystokinin receptor-like			BGLB019675	8.1986807365385e-95	2.7407934210321	0.952	0.41	1.38770870146651e-90	1	21.630486214275	predicted protein			BGLB035557	1.0030849865201e-36	1.82571650628999	0.433	0.106	1.69782164818393e-32	2	3.28817563715002	#N/A			BGLB013804	1.44131246866367e-130	3.42051736343918	1	0.112	2.43956548446012e-126	3	34.2874836133661	cathepsin B-like			BGLB024265	1.65603060872879e-23	1.03414796227581	1	0.903	2.80299740833435e-19
BGLB019195	1.18499361077326e-104	2.12918208660453	0.829	0.279	2.00572018559482E-100	0	25.4892337374502	cartilage matrix -like			BGLB032855	1.49997214493394e-91	2.26800790310806	0.976	0.919	2.53885285251519e-87	1	102.514598532167	PREDICTED: uncharacterized protein LOC106074462 isoform X1			BGLB020991	7.08879306692375e-36	0.806626189508592	0.267	0.036	1.19984911450751e-31	2	0.908863063641041	growth arrest and DNA damage-inducible GADD45 alpha-like			BGLB031055	5.5146179259678e-129	1.22383259307322	0.286	0	9.33404230149309e-125	3	1.33676718710647	#N/A			BGLB036616	2.03494350033166e-23	0.369104289725952	0.305	0.045	3.44434536866136e-19
BGLB027872	3.58903456986856e-104	1.24509417881871	0.985	0.697	6.07479991295953E-100	0	19.7761791917738	glutathione S-transferase Mu 1-like			BGLB030300	1.18955992065633e-88	1.28914325258888	0.381	0.025	2.0134491217029e-84	1	1.68913818546684	beta,beta-carotene 15,15 -monooxygenase-like			BGLB029966	1.51781381747329e-35	1.1296147724502	0.373	0.076	2.56905166745528e-31	2	1.57179909755312	basic leucine zipper transcriptional factor ATF-like isoform X2; proto-oncogene c-Fos-like			BGLB020028	1.31606109219498e-125	1.34117609752916	0.308	0.002	2.22756500464922e-121	3	1.54683969726127	polypeptide N-acetylgalactosaminyltransferase 1-like			BGLB039536	7.60797256145723e-23	0.563751335037162	0.598	0.153	1.28772543575225e-18
BGLB037231	1.46387686077589e-102	1.02914120847812	0.929	0.347	2.47775797454928E-98	0	4.4202656703654	PREDICTED: uncharacterized protein LOC106078599 isoform X2; vomeronasal type-2 receptor 116-like			BGLB018337	2.17260245951696e-88	1.70854447584791	0.994	0.992	3.6773469229784e-84	1	116.651245342749	tubulin alpha chain			BGLB038607	9.92975557480982e-35	1.75769113650396	0.747	0.455	1.68071042859231e-30	2	6.72550938622409	PREDICTED: uncharacterized protein LOC106070705, partial			BGLB018074	6.41496710206224e-125	2.78568202196874	0.703	0.049	1.08579733169506e-120	3	7.61041144773672	T-cell leukemia homeobox 3			BGLB033463	8.87849322034433e-22	1.04608496046668	0.78	0.343	1.50277376247548e-17
BGLB037389	1.15244333739659e-99	1.08275499021049	0.712	0.169	1.95062559287747E-95	0	1.95444423397356	vascular endothelial growth factor A-like			BGLB024938	1.2092707586757e-87	1.83380265538299	0.988	0.996	2.0468116861345e-83	1	354.813074861551	#N/A			BGLB020743	4.33236468347316e-34	0.792253193069367	0.287	0.043	7.33296046324667e-30	2	1.03204160447784	PREDICTED: uncharacterized protein LOC106069422			BGLB034719	7.11168479057898e-125	1.22062442622776	0.297	0.001	1.2037237676534e-120	3	1.33408993497288	#N/A			BGLB037871	4.93141644626882e-21	1.21525636110238	1	0.881	8.34691547695461e-17
BGLB014411	5.84190628268876e-99	1.01754352344064	0.98	0.523	9.88801057407899E-95	0	7.27613147269234	enolase			BGLB012690	1.14480132694821e-84	1.84033415677406	0.976	0.965	1.93769072599254e-80	1	35.9052515105455	tubulin beta-4B chain			BGLB032828	5.8132832729264e-33	1.42017161584693	0.687	0.293	9.83956326775522e-29	2	5.5698011282371	---NA---			BGLB031851	4.30470223734234e-119	1.2251690792193	0.275	0.001	7.28613900692564e-115	3	1.33959099950802	PREDICTED: uncharacterized protein LOC106063846			BGLB024001	9.25553065823747e-21	0.751278135832897	0.415	0.097	1.56659111921327e-16
BGLB039407	1.28398822490538e-97	1.1131153264285	0.864	0.307	2.17327846947484E-93	0	3.55032246464343	Uncharacterized threonine-rich GPI-anchored glycoprotein PJ4664.02			BGLB012422	1.22052070586779e-83	1.0298089222747	0.542	0.063	2.06585334675182e-79	1	3.13402669017707	cathepsin L1-like			BGLB001989	7.18887304141041e-33	1.37530271374781	0.907	0.887	1.21678865098913e-28	2	13.6190005918645	Histidine triad nucleotide-binding 1			BGLB020058	1.13382548319709e-116	1.1978717140427	0.297	0.002	1.91911301285939e-112	3	1.30273743468408	myb-like protein W			BGLB003918	1.21335007754201e-19	0.384416151783962	0.463	0.107	2.0537163412476e-15
BGLB036135	4.83235959170667e-96	1.20139220698875	0.859	0.315	8.17925184492271E-92	0	4.16065323369051	cystatin-B isoform X2			BGLB026277	2.95979983902743e-83	1.26010466675749	0.345	0.023	5.00975720753782e-79	1	1.46477700800112	multiple epidermal growth factor-like domains 10			BGLB023351	1.62259920808317e-32	1.71816479623376	0.493	0.136	2.74641141960157e-28	2	5.94235670126303	CD63 antigen-like			BGLB034941	5.72304757176379e-114	1.18749333248712	0.264	0.001	9.68683031996739e-110	3	1.28000430062634	PREDICTED: uncharacterized protein LOC106059655			BGLB013479	1.32576026342965e-19	0.860554349067334	0.963	0.886	2.24398182188103e-15
BGLB009326	1.42027846623191e-95	0.80648684415759	0.999	0.889	2.40396333194413E-91	0	17.8718308549674	glyceraldehyde-3-phosphate dehydrogenase			BGLB008836	5.73923497481248e-82	2.73230684461711	0.821	0.284	9.7142291183676e-78	1	11.2510892584811	ganglioside GM2 activator-like			BGLB031147	1.63650569810697e-32	1.8235428457735	0.76	0.492	2.76994954461586e-28	2	8.1082874013474	microtubule-associated futsch-like isoform X1			BGLB010327	4.06364555440899e-109	1.92426856634956	0.495	0.023	6.87812646539265e-105	3	3.0704353216184	neuroglobin-like isoform X4			BGLB024074	1.75672799191948e-19	0.29758037047513	0.293	0.049	2.97343779912291e-15
BGLB034114	2.7750737217792e-94	1.08400446346676	0.868	0.301	4.69708978148348E-90	0	4.13472764275608	PREDICTED: uncharacterized protein LOC106060782			BGLB006210	1.71991851013666e-79	1.75133799516847	0.905	0.336	2.9111340702573e-75	1	12.9299441482663	cathepsin L1-like			BGLB034464	6.77965713478782e-31	1.33082786017894	0.507	0.161	1.14752476663419e-26	2	2.73230220161672	rho-associated protein kinase let-502-like			BGLB031191	4.07192315773307e-108	3.32289318589873	0.692	0.059	6.89213713677899e-104	3	12.6955747966547	Proline-rich transmembrane 1			BGLB010807	2.32790430808708e-19	1.03434821784951	1	0.85	3.9402108318682e-15
BGLB017477	4.29264822757541e-92	1.02239317623515	0.741	0.199	7.26573638999413E-88	0	2.21892913608028	peroxidasin-like isoform X2			BGLB033278	4.09911951453335e-79	0.920820497886843	0.25	0.008	6.93816969029915e-75	1	0.945058504180211	gelsolin 2			BGLB032020	1.29068277132552e-30	1.12140172481972	0.353	0.078	2.18460965874557e-26	2	1.52419115700662	#N/A			BGLB040018	6.26813912748574e-108	1.43656660044507	0.308	0.004	1.06094522871824e-103	3	1.73011792312438	PREDICTED: uncharacterized protein LOC106059680, partial			BGLB035838	3.88122798981569e-19	0.795215384626838	0.585	0.18	6.56936649556204e-15
BGLB016015	2.89620422433064e-91	1.05527990899098	0.691	0.172	4.90211527010204E-87	0	1.85182095852703	PREDICTED: uncharacterized protein LOC106054034			BGLB005986	3.34514032810722e-78	1.82920840211093	0.917	0.377	5.66198451935427e-74	1	15.7070012074967	cathepsin L1-like			BGLB024605	7.4998324671402e-29	1.22288060343671	0.26	0.043	1.26942164338815e-24	2	1.79093954302241	PREDICTED: uncharacterized protein LOC106076982			BGLB001632	6.37032607954678e-107	1.63348241564387	0.396	0.012	1.07824139222409e-102	3	2.19710686078407	odd-skipped-related 1			BGLB021850	7.54781025357077e-19	0.274946153176849	0.268	0.043	1.27754236351939e-14
BGLB001796	7.60253941260311e-91	0.957395472403733	0.734	0.195	1.2868058209772E-86	0	2.03175032522102	tolloid 1			BGLB003718	6.65790529946361e-78	1.71612249376444	0.661	0.148	1.12691705098721e-73	1	3.47208592393291	T-cell acute lymphocytic leukemia 1 isoform X2			BGLB023948	9.28978840579826e-29	0.971636795094301	0.273	0.05	1.57238958556541e-24	2	1.1370045025893	PREDICTED: uncharacterized protein LOC106074464			BGLB001464	1.70517340089479e-96	1.22244277627371	0.275	0.004	2.88617649835452e-92	3	1.35052684468417	Friend leukemia integration 1 transcription			BGLB035335	3.48508307190321e-18	0.526884520875019	0.439	0.107	5.89885160750337e-14
BGLB005843	2.0335547697102e-88	1.23495678098406	0.762	0.24	3.44199480321148E-84	0	3.63350279104569	intraflagellar transport 43 homolog			BGLB038633	8.98507670185149e-78	1.37015821073292	0.452	0.055	1.52081408255538e-73	1	1.79048514652618	PREDICTED: uncharacterized protein LOC106058242			BGLB000047	1.03075116448982e-28	3.80599798110011	0.807	0.683	1.74464942101547e-24	2	173.853900412184	antimicrobial peptide hydramacin			BGLB022576	1.44701292087644e-89	2.93071089503834	0.758	0.105	2.44921406987546e-85	3	7.84924073184512	liver specific protein 1, putative			BGLB011582	1.52763651920841e-17	0.514877202126724	0.549	0.161	2.58567757241216e-13
BGLB025643	1.41895099273141e-87	1.55433042716641	0.615	0.111	2.40171645029718E-83	0	2.87844377889345	Ficolin-1			BGLB002971	8.80344093046348e-77	1.65460977248612	0.458	0.059	1.49007041189025e-72	1	2.39617857646815	DNA repair RAD52 homolog; DNA repair RAD52 homolog isoform X1			BGLB005970	5.0046834465212e-28	1.55260591833091	0.9	0.933	8.47092720158179e-24	2	25.0947897714139	flocculation FLO11-like isoform X1			BGLB022600	2.4367860794071e-88	1.29950762081321	0.319	0.009	4.12450411800446e-84	3	1.49592880024515	#N/A			BGLB019751	3.91309095491316e-17	0.417354256175497	0.451	0.117	6.62329775028601e-13
BGLB019413	4.3200401195064e-87	0.714524429909789	1	0.997	7.31209990627653E-83	0	131.545748049357	beta-actin isotype 1			BGLB032900	2.80487682539587e-76	1.3234460913199	0.994	0.996	4.74753451466506e-72	1	64.3637503180933	annexin A7-like isoform X2			BGLB012921	1.35063967356583e-27	2.05597972009773	0.673	0.403	2.28609271147753e-23	2	6.57641225012614	Cytosolic non-specific dipeptidase			BGLB020743	3.46325978040133e-86	1.84979863411335	0.527	0.039	5.86191350430728e-82	3	3.00799764524375	PREDICTED: uncharacterized protein LOC106069422			BGLB020937	4.82449770326685e-17	0.410905762432344	0.341	0.074	8.16594481254948e-13
BGLB037204	1.36413595613976e-86	1.04961085776349	0.666	0.157	2.30893651936216E-82	0	1.83991518953947	PREDICTED: uncharacterized protein LOC106053750			BGLB028389	4.3890263242535e-74	1.66974010610039	0.976	0.986	7.42886595643147e-70	1	48.238104876392	#N/A			BGLB007186	2.7165898732446e-27	1.88176169880361	0.467	0.16	4.59810001945382e-23	2	4.3789274478248	GTPase IMAP family member 7-like			BGLB023201	9.03223604848178e-83	1.31494963245515	0.286	0.007	1.52879627356603e-78	3	1.5552408155039	PREDICTED: uncharacterized protein LOC106079053			BGLB019862	1.11538944836431e-16	0.693732385633453	0.817	0.397	1.88790818030143e-12
BGLB034276	9.24304794990647e-85	1.1593688805204	0.727	0.22	1.56447829600117E-80	0	2.81554931955887	low affinity immunoglobulin epsilon Fc receptor-like isoform X2			BGLB008904	4.51053894893234e-63	1.52545794578312	0.5	0.092	7.63453822496289e-59	1	2.40404095420134	tRNA pseudouridine(38 39) synthase-like			BGLB039021	2.96977548150117e-27	1.40191302807266	0.847	0.816	5.02664197998889e-23	2	10.9738407526224	#N/A			BGLB032916	1.76318736304169e-76	1.28789347135232	0.374	0.019	2.98437093068436e-72	3	1.64828546522243	aquaporin-10-like			BGLB033013	1.63963030621459e-16	1.20916205657898	0.976	0.772	2.77523825629882e-12
BGLB006115	4.78684689419994e-83	0.880562009801787	0.992	0.484	8.10221705312282E-79	0	16.4196624912591	Ferric-chelate reductase 1			BGLB011956	7.47009773570255e-61	1.37069071620018	0.429	0.067	1.26438874274501e-56	1	1.84750277827678	testis-expressed sequence 2 isoform X1			BGLB034019	3.10463125203558e-27	1.24717863280732	0.327	0.078	5.25489885719542e-23	2	1.68128575376201	PREDICTED: uncharacterized protein LOC106057418			BGLB030855	3.72976172615636e-76	1.39180998506763	0.363	0.018	6.31299469769226e-72	3	1.76239790811944	PREDICTED: uncharacterized protein LOC106058497 isoform X2			BGLB032590	2.19224949176275e-16	0.315812862669599	0.354	0.077	3.71060148975763e-12
BGLB019919	1.07362001046247e-81	0.87118907060656	0.99	0.751	1.81720922970878E-77	0	13.2557349893591	cysteine-rich 1			BGLB030524	1.59581315897825e-60	2.01856412861122	0.75	0.32	2.70107335288659e-56	1	5.38266950746983	multiple C2 and transmembrane domain-containing 1-like			BGLB025503	4.39325649234414e-27	2.67738024893536	0.527	0.215	7.43602593894168e-23	2	12.1307459907178	legumain-like			BGLB023343	1.46773481484427e-70	2.31608900938965	0.747	0.113	2.48428794760541e-66	3	7.57284091661049	ceroid-lipofuscinosis neuronal 6			BGLB030333	3.42590692720285e-16	0.331717650971982	0.268	0.05	5.79869006498355e-12
BGLB026515	2.05741351016582e-81	0.954060563949037	0.745	0.24	3.48237810730667E-77	0	2.12160896444621	Calcitonin receptor-like protein 1			BGLB025952	1.45728037010798e-56	1.83249802948096	0.845	0.513	2.46659275444476e-52	1	6.93728644172351	shootin-1-like isoform X1			BGLB021080	1.59759594327129e-26	1.04425239289318	0.333	0.078	2.70409089358098e-22	2	1.50247226509155	PREDICTED: uncharacterized protein LOC106057727			BGLB036453	2.38894415400943e-70	1.81651030886084	0.429	0.031	4.04352687507636e-66	3	2.86178030460141	PREDICTED: uncharacterized protein LOC106061158			BGLB038554	2.15268125336248e-15	0.353479956369395	0.28	0.056	3.64362828944133e-11
BGLB010001	3.0635248364649e-81	0.902841770363335	0.981	0.676	5.18532213820048E-77	0	8.290771268604	mesocentin-like isoform X2; mesocentin-like isoform X1; mesocentin-like isoform X4			BGLB017323	2.14234859191849e-56	1.89643808493357	0.667	0.234	3.62613922668123e-52	1	4.32111393627753	HD domain-containing; PREDICTED: uncharacterized protein LOC106054865 isoform X1			BGLB000026	7.73855978582301e-26	2.308534667452	0.573	0.274	1.3098286293484e-21	2	7.19050929350819	#N/A			BGLB003696	1.1646095080957e-69	1.89696501345092	0.429	0.033	1.97121805340279e-65	3	2.88682118477487	anoctamin-4-like isoform X9			BGLB012406	2.29338146929352e-15	0.8812206334857	0.927	0.64	3.88177747492622e-11
BGLB027475	1.00535258582889e-79	0.767711304570704	0.996	0.779	1.70165978677398E-75	0	15.2277314026673	microtubule-associated 1B-like isoform X4; beta-thymosin domain repeat CSP29KDa_v1			BGLB040361	2.29257855713582e-56	1.28374983691968	0.363	0.048	3.88041846580809e-52	1	1.6540760769287	dual oxidase 2-like			BGLB012965	2.21852592883483e-25	1.08846571266667	0.333	0.085	3.75507698714583e-21	2	1.45866544976849	heterogeneous nuclear ribonucleo U 1			BGLB006210	5.4486268777141e-68	3.95427981753529	0.978	0.354	9.22234585321888e-64	3	46.3016184106624	cathepsin L1-like			BGLB038255	3.5366635100826e-15	0.829774500771565	0.756	0.358	5.98615665716581e-11
BGLB013041	1.3505964226383e-77	0.794545874176587	0.99	0.704	2.28601950495759E-73	0	8.75642667819531	glyoxylate reductase hydroxypyruvate reductase-like			BGLB002997	3.36654847531108e-56	1.64280897274019	0.935	0.829	5.69821994931153e-52	1	13.4647431472348	maternal -like			BGLB005761	3.54429698079439e-25	2.16151149881456	0.813	0.889	5.99907706969259e-21	2	26.7520494137098	cathepsin B			BGLB032357	1.47219089130628e-67	3.44749689103928	0.978	0.394	2.49183030262501e-63	3	19.4428108074322	#N/A			BGLB025091	4.60273246712959e-15	2.03996010529456	0.768	0.368	7.79058497386355e-11
BGLB000499	1.36391806659224e-77	1.11864090530755	0.875	0.392	2.30856771951403E-73	0	5.02705217920055	SAM pointed domain-containing Ets transcription factor; SAM pointed domain-containing Ets transcription factor-like isoform X2			BGLB020284	5.53048846372525e-53	0.812985856620926	1	1	9.36090477370136e-49	1	69.5513999909129	polyubiquitin-B			BGLB028495	5.46869318552534e-25	3.19528427835933	0.753	0.65	9.25631008582019e-21	2	41.0809536097042	#N/A			BGLB005986	1.45379533191769e-63	3.87029374503405	0.978	0.394	2.46069397880388e-59	3	51.5176391808675	cathepsin L1-like			BGLB016493	7.5732244869497e-15	0.800424390879917	0.878	0.501	1.28184397666111e-10
BGLB001198	2.26317770609511e-77	0.754425644939844	0.99	0.728	3.83065458533657E-73	0	9.62763042634179	phosphoglycerate kinase			BGLB036938	1.45967264401114e-51	1.33667123420159	0.369	0.057	2.47064191725325e-47	1	1.74566120996415	EF-hand calcium-binding domain-containing 7-like isoform X1			BGLB011537	9.94229757933788e-25	2.1720321751173	0.753	0.72	1.68283328827873e-20	2	13.8756283925241	cathepsin L1-like			BGLB004909	2.44278035961456e-60	2.47037814296459	0.692	0.121	4.1346500366836e-56	3	8.43904071435899	PREDICTED: uncharacterized protein LOC106060241			BGLB019846	2.11378309735988e-14	0.693805897519991	0.939	0.613	3.57778927059134e-10
BGLB016828	3.17343859101534e-77	0.935989119067882	0.991	0.707	5.37136215915257E-73	0	11.461760981652	myosin heavy non-muscle-like isoform X3; myosin heavy non-muscle isoform X3; myosin heavy non-muscle-like isoform X1; myosin heavy non-muscle-like isoform X2; myosin heavy non-muscle-like isoform X4			BGLB029118	8.00189139402735e-49	1.26406241059658	0.97	0.954	1.35440013735307e-44	1	16.247810328763	X-box-binding 1-like			BGLB022042	3.56852690619511e-23	1.45579376620118	0.467	0.191	6.04008864142584e-19	2	2.63532830804217	#N/A			BGLB028859	8.25359571063493e-60	1.52145361060659	0.396	0.032	1.39700360998207e-55	3	2.17782859688586	proteoglycan 4-like			BGLB025441	2.86524920201366e-14	0.431303634085074	0.451	0.134	4.84972079932832e-10
BGLB024955	1.91560078560865e-76	0.886880411223038	0.713	0.228	3.24234588972121E-72	0	1.8744196061666	PDZ and LIM domain 3-like isoform X2			BGLB019662	1.04942852118602e-46	1.8658230533351	0.786	0.489	1.77626271495946e-42	1	6.85483320263909	#N/A			BGLB013211	4.81399619094781e-23	1.50546026879413	0.387	0.127	8.14816995279826e-19	2	2.44891716232996	fatty acid hydroxylase domain-containing 2-like			BGLB025503	2.72718726607326e-59	2.73161748105885	0.824	0.211	4.6160371665556e-55	3	14.125499226369	legumain-like			BGLB021285	2.99657619395147e-14	0.726863644254502	0.988	0.857	5.07200486588225e-10
BGLB034337	1.37803050573129e-75	1.12788108223326	0.714	0.233	2.33245443400078E-71	0	2.8905824449886	PREDICTED: uncharacterized protein LOC106071617			BGLB006402	3.3095022932425e-46	1.39837386918973	0.458	0.107	5.60166358154226e-42	1	2.1369440437751	kinase brain isozyme isoform X1			BGLB028237	1.8233903919347e-22	0.986103320685813	0.373	0.116	3.08627057738867e-18	2	1.48222706838838	GTPase IMAP family member 7-like			BGLB003640	2.24639326473674e-58	2.48708366642404	0.714	0.146	3.80224523989341e-54	3	6.98040572915558	phosphonoacetaldehyde hydrolase-like			BGLB038465	4.26643299223935e-14	0.630609227385095	0.866	0.438	7.22136448266432e-10
BGLB002203	6.9250498343855e-75	0.845982692624005	0.929	0.497	1.17213393496809E-70	0	4.35180781560763	6-phosphogluconate decarboxylating-like			BGLB031208	4.02545938983576e-46	1.33443725623017	0.881	0.747	6.81349256323601e-42	1	6.92589397358422	PREDICTED: uncharacterized protein LOC106072566			BGLB035013	4.37390395602848e-22	1.59395228279708	0.547	0.268	7.4032698359738e-18	2	3.9312327423418	PREDICTED: uncharacterized protein LOC106078208			BGLB023351	9.09385734031537e-58	2.41098240940592	0.725	0.136	1.53922629342178e-53	3	10.0073184578097	CD63 antigen-like			BGLB035936	1.68818174790702e-13	0.357563282626578	0.293	0.069	2.85741642650743e-09
BGLB038119	2.43696543882122e-74	0.941888943549959	0.839	0.333	4.1248077017488E-70	0	4.80433020122736	PREDICTED: uncharacterized protein LOC106053560 isoform X1			BGLB032629	9.10201606255784e-46	1.16602437940357	0.315	0.045	1.54060723874854e-41	1	1.4208191307593	#N/A			BGLB028922	1.64425118197084e-21	1.67291046332811	0.287	0.071	2.78305955060385e-17	2	4.06094276336286	#N/A			BGLB030828	4.13046894519918e-57	2.77017483673485	0.824	0.194	6.99123173664414e-53	3	15.9253344123203	PREDICTED: uncharacterized protein LOC106077476			BGLB033720	4.2536357253884e-13	0.28799191180379	0.378	0.103	7.1997038287924e-09
BGLB006993	4.21762139595155e-72	0.621818705667617	0.998	0.925	7.13874597478759E-68	0	22.2917415931761	Transcription factor			BGLB004609	1.18798715452696e-43	1.7388093190148	0.714	0.38	2.01078705775233e-39	1	4.86812344999982	neuronal calcium sensor 2-like			BGLB012718	2.37788184378367e-21	1.13625928290659	0.567	0.29	4.02480280878824e-17	2	2.52302700207295	GTPase IMAP family member 7-like			BGLB001930	6.82072487460561e-57	2.36402595070512	0.802	0.211	1.15447589227575e-52	3	6.77434788997156	lethal(2) giant larvae homolog 1-like			BGLB030824	5.04149791321933e-13	0.906658185005629	0.976	0.784	8.53323936791504e-09
BGLB032540	1.26588790087749e-71	0.848165341018167	0.733	0.233	2.14264186102524E-67	0	2.3425348861118	multiple epidermal growth factor-like domains protein 10			BGLB024940	4.39408662911966e-42	1.13665511536882	0.935	0.942	7.43743102844793e-38	1	16.215150529291	ras-related Rac1			BGLB034176	6.52667167011188e-21	1.50781028516322	0.273	0.068	1.10470444688314e-16	2	2.16829857409726	PREDICTED: uncharacterized protein LOC106077705			BGLB020077	1.79198983184736e-56	1.95822933403421	0.484	0.056	3.03312198938484e-52	3	3.64433364011567	PREDICTED: uncharacterized protein LOC106071920			BGLB009416	8.47212446904463e-13	0.335818285147921	0.415	0.121	1.43399178763049e-08
BGLB012194	2.6970465879089e-71	0.88560623344144	0.723	0.242	4.56502105469461E-67	0	2.08578739106982	collagen alpha-1(I) chain-like isoform X1			BGLB026993	5.34237006019633e-41	1.52832315869358	0.577	0.219	9.0424955638883e-37	1	2.93411077594767	PREDICTED: uncharacterized protein LOC106073894 isoform X1			BGLB001747	7.27304463739735e-21	1.1760837093652	0.513	0.229	1.23103553532588e-16	2	2.67599653295053	Low-density lipo receptor-related 4			BGLB038538	9.07048832144595e-54	1.92966712542756	0.571	0.088	1.53527085328794e-49	3	3.98316910935204	PREDICTED: uncharacterized protein LOC106061867			BGLB007929	9.09350144766683e-13	0.287127532554144	0.378	0.103	1.53916605503209e-08
BGLB018293	5.90052313629386e-71	0.706308492054383	0.903	0.399	9.98722546049099E-67	0	4.86982532398865	Armadillo repeat-containing X-linked protein 5			BGLB002823	7.33885784073378e-41	1.53277131585614	0.458	0.125	1.2421750781226e-36	1	2.43405248675551	cytosolic phospholipase A2-like isoform X5			BGLB020558	1.07142757972988e-20	1.29145935287759	0.893	0.993	1.81349832145079e-16	2	52.6075290361285	#N/A			BGLB032828	2.79529420319903e-53	2.71819574273344	0.879	0.296	4.73131496833468e-49	3	13.6209937068078	---NA---			BGLB017070	9.57304523728078e-13	0.597392646627849	0.976	0.737	1.62033363686215e-08
BGLB007473	2.81723658751165e-70	0.575772246161931	0.999	0.922	4.76845464802222E-66	0	16.3360335249777	myosin-2 essential light chain-like			BGLB039259	1.22389161416394e-40	1.69432726217736	0.738	0.456	2.07155894613389e-36	1	5.18847081542811	cysteine ase CG12163			BGLB020284	1.90856995180648e-20	0.71297158671754	0.993	1	3.23044550042766e-16	2	65.7255233062371	polyubiquitin-B			BGLB019675	1.00893209993737e-52	3.4571173642409	0.945	0.43	1.70771847235399e-48	3	36.7401022150852	predicted protein			BGLB001486	1.22374727515399e-12	0.315337513875419	0.451	0.138	2.07131463792565e-08
BGLB036665	1.94383658604055e-69	0.958631331388548	0.671	0.22	3.29013780553224E-65	0	2.07401380390765	Inner membrane yibH			BGLB033214	3.79327130413946e-39	1.06013080401616	0.357	0.071	6.42049100938646e-35	1	1.34726097503838	very low-density lipoprotein receptor-like			BGLB003640	3.89124907646551e-19	1.13983005048287	0.413	0.152	6.58632818682552e-15	2	2.45199413088214	phosphonoacetaldehyde hydrolase-like			BGLB012903	1.65042612687114e-51	1.10622139986834	0.308	0.022	2.79351126234209e-47	3	1.21770932220562	amino acid transporter ANTL1-like isoform X1; amino acid transporter ANTL1-like isoform X2			BGLB000204	1.50825092015037e-12	0.917862818334325	0.939	0.723	2.55286550744652e-08
BGLB023857	8.3113514198799e-69	0.885067863756174	0.607	0.152	1.40677934132887E-64	0	1.54416477276259	Ficolin-2			BGLB038610	7.26722995637208e-39	1.5698664443603	0.619	0.28	1.23005134241554e-34	1	3.34884748542454	differentially expressed in FDCP 6 homolog			BGLB012981	4.33454509427719e-19	0.935201232302603	0.833	0.743	7.33665102657357e-15	2	5.86177681615899	PREDICTED: rhodopsin-like			BGLB021794	6.66609414806687e-51	2.92002482745195	0.659	0.147	1.1283030955018e-46	3	8.30637719091904	gluconate kinase			BGLB005756	2.25416743013421e-12	0.507188233435982	0.622	0.25	3.81540379224516e-08
BGLB001224	2.19019429035828e-67	0.906172619140799	0.733	0.254	3.70712285586042E-63	0	2.50287371977745	cysteine and glycine-rich 2-like isoform X1			BGLB030145	1.20222870510291e-38	1.40165752576708	0.869	0.806	2.03489230625718e-34	1	9.50765054546987	#N/A			BGLB005410	4.61007744821201e-19	1.64723350024963	0.633	0.417	7.80301708884364e-15	2	5.57563524944859	prediced GPI-anchored 23-like			BGLB033493	2.37791748796529e-50	1.59755858115854	0.418	0.047	4.02486314013005e-46	3	2.33428486535799	#N/A			BGLB001062	3.00137216978155e-12	0.407381954435791	0.549	0.202	5.08012253457225e-08
BGLB017487	2.02368219872237e-66	0.864249152849651	0.619	0.185	3.42528448955748E-62	0	1.55427029370776	nidogen-1-like isoform X1			BGLB019564	1.61980966962538e-38	1.39411242929415	0.429	0.114	2.74168984680792e-34	1	2.04640478368366	cell wall protein RBR3-like			BGLB007090	5.66260508365687e-18	1.03455644050439	0.373	0.141	9.58452536459761e-14	2	1.56729112615954	gastric triacylglycerol lipase-like; lysosomal acid lipase cholesteryl ester hydrolase-like			BGLB024605	2.99202042824556e-50	1.58748605281351	0.407	0.042	5.06429377684843e-46	3	2.62010192547011	PREDICTED: uncharacterized protein LOC106076982			BGLB003848	3.21653608230796e-12	0.37366862325679	0.451	0.148	5.44430897291445e-08
BGLB032863	6.76937088776284e-66	0.892851216591999	0.634	0.19	1.14578371646274E-61	0	1.67266357417914	balbiani ring 3-like			BGLB014273	1.27740334781318e-37	1.82101040508367	0.75	0.451	2.16213290650859e-33	1	8.88657423712574	PREDICTED: uncharacterized protein LOC106053682			BGLB010804	7.44724737018625e-18	1.55663671550141	0.627	0.454	1.26052108987772e-13	2	5.10045115145408	cathepsin D			BGLB021587	7.37622709670399e-50	1.23055426012804	0.341	0.029	1.24850019838812e-45	3	1.5300951640465	#N/A			BGLB000080	3.67930916153999e-12	0.359351696142491	0.439	0.142	6.22759868682258e-08
BGLB019939	1.1109163721566e-65	1.28741927637084	0.726	0.268	1.88033705151227E-61	0	11.1255799628319	PREDICTED: uncharacterized protein LOC106058857			BGLB011402	1.11881772886405e-36	1.48773916660972	0.804	0.673	1.89371088787529e-32	1	6.89600228283872	#N/A			BGLB018951	9.31748590509113e-18	1.37374295155579	0.727	0.634	1.57707766429572e-13	2	7.10485703748556	PREDICTED: uncharacterized protein LOC106055297 isoform X1			BGLB034863	2.21225505475967e-47	1.52839624210037	0.341	0.031	3.74446290568622e-43	3	2.13629257411719	PREDICTED: uncharacterized protein LOC106067277, partial			BGLB009190	9.08336383431588e-12	0.471879924245736	1	0.974	1.53745016259631e-07
BGLB039852	3.80426023870038e-65	0.805675541207984	0.566	0.136	6.43909088002427E-61	0	1.2489871005295	D(2) dopamine receptor-like isoform X1			BGLB036760	1.57836697180206e-36	1.12725445813115	0.899	0.848	2.67154393647218e-32	1	9.66515354165609	triple functional domain -like			BGLB026796	1.26223903474949e-17	1.19103302595974	0.687	0.485	2.13646579021699e-13	2	4.46145557216478	protein AIG1-like			BGLB021600	1.1504007085385e-46	2.01130047702855	0.593	0.122	1.94716823927227e-42	3	3.90052386478649	carcinoembryonic antigen-related cell adhesion molecule 1-like isoform X1			BGLB002358	1.17265739703606e-11	0.458177599958478	0.598	0.227	1.98483991022323e-07
BGLB032683	5.73945086131875e-64	0.803156105737858	0.706	0.258	9.71459452786811E-60	0	2.79116369797155	tetraspanin-1 isoform X1			BGLB020826	3.02701055013619e-36	1.28981409699126	0.429	0.117	5.12351805716052e-32	1	1.94173754162618	Phosphoserine aminotransferase			BGLB030247	1.53285926764084e-16	0.615971812999733	0.26	0.072	2.59451759640888e-12	2	0.816006851127622	PREDICTED: uncharacterized protein LOC106069290			BGLB039622	1.88456607159569e-44	1.85882156655624	0.473	0.074	3.18981653278286e-40	3	3.07135754478858	fasciclin-2 isoform X2			BGLB032100	1.61457992450619e-11	0.26673048689531	0.463	0.153	2.73283798021917e-07
BGLB035517	1.22032276423205e-63	0.748200301213254	0.901	0.451	2.06551831073916E-59	0	3.86322094922356	sialin-like			BGLB025197	9.04731095895203e-36	1.19999769556175	0.827	0.678	1.53134785291222e-31	1	5.7091107129419	#N/A			BGLB030999	2.19488220847504e-16	0.383508451643264	0.273	0.073	3.71505762606485e-12	2	1.12082914029966	arf-GAP with Rho-GAP ANK repeat and PH domain-containing 2-like			BGLB012897	4.14097610176827e-44	2.10960120580043	0.484	0.079	7.00901614985298e-40	3	3.84793344186008	zinc finger 236-like			BGLB011124	1.81147268177705e-11	0.279550538145688	1	0.999	3.06609866117583e-07
BGLB033917	1.568601799119e-63	0.689529951369938	0.775	0.287	2.65501540518882E-59	0	2.36572952175199	fatty acid-binding heart-like			BGLB012721	9.43443986431535e-36	1.18081904780859	0.417	0.108	1.59687329143402e-31	1	1.82962174216592	group XV phospholipase A2-like			BGLB000008	2.40582527459025e-16	2.81560253276542	0.353	0.139	4.07209985977146e-12	2	8.57993061003279	probable glutathione S-transferase 7			BGLB034541	1.66811863246418e-43	2.81376529208904	0.802	0.324	2.82345759730887e-39	3	10.3205047945597	PREDICTED: uncharacterized protein LOC106062281			BGLB008990	2.90655957007061e-11	0.617994018285857	0.817	0.466	4.91964272830152e-07
BGLB024774	2.82740176367567e-63	1.05410229773035	0.539	0.136	4.78566022519745E-59	0	1.71548347060968	peptidylglycine alpha-hydroxylating monooxygenase			BGLB012308	1.0146766692997e-35	0.892005734431733	0.952	0.935	1.71744173045668e-31	1	10.7239604875854	26S protease regulatory subunit 4			BGLB025758	4.43987995445127e-16	1.23592970184729	0.64	0.494	7.51494081090423e-12	2	4.07282307998649	rho-associated protein kinase let-502-like			BGLB005761	6.6203620282453e-42	2.01386844119479	0.978	0.88	1.1205624769008e-37	3	26.5334148284427	cathepsin B			BGLB002155	3.84117777790403e-11	0.316784661368704	1	0.999	6.50157750688036e-07
BGLB026769	9.5539114405223e-63	0.743302826849268	0.996	0.699	1.61709505042281E-58	0	22.7833206936397	rho-related GTP-binding -like			BGLB002040	8.26772062495462e-35	0.708402683757059	0.97	0.974	1.39939439297982e-30	1	12.7042269116825	histone			BGLB001042	4.50921825136738e-16	1.03608039953292	0.367	0.151	7.63230281226443e-12	2	1.58868771220447	alpha-galactosidase A-like isoform X1; alpha-N-acetylgalactosaminidase-like isoform X2			BGLB002437	1.63729925899821e-40	1.31462235359382	0.989	0.964	2.77129272578038e-36	3	17.0405683724809	guanine nucleotide-binding subunit gamma-1-like; guanine nucleotide-binding G(I) G(S) G(O) subunit gamma-12-like			BGLB004017	5.59220389613471e-11	0.332020525496136	0.537	0.202	9.4653643145976e-07
BGLB002377	2.3080536943649e-62	0.7494935179529	0.708	0.251	3.90661168308203E-58	0	1.79801154314014	PDZ and LIM domain 7-like isoform X2			BGLB037086	8.87073100173396e-35	1.35036396866468	0.417	0.116	1.50145992935349e-30	1	2.04775984669	#NOM?			BGLB029441	4.82638088984345e-16	1.41847913596016	0.367	0.141	8.16913229414902e-12	2	2.67852130448349	PREDICTED: uncharacterized protein LOC106074032, partial			BGLB032900	1.84903191236962e-39	1.31302388481266	0.989	0.996	3.12967141487682e-35	3	67.1640348432167	annexin A7-like isoform X2			BGLB003474	5.83526831059762e-11	0.540547927646067	0.915	0.656	9.87677514251753e-07
BGLB033202	2.94125132805093e-62	0.800169235199504	0.574	0.152	4.97836199785901E-58	0	1.32399762983544	PREDICTED: uncharacterized protein LOC106055149			BGLB006724	3.73680840617214e-34	0.971365351068272	0.905	0.877	6.32492190828696e-30	1	7.99719111695857	dynein light chain Tctex-type 1			BGLB024882	1.34244855813021e-15	1.23709320736357	0.78	0.831	2.27222842949119e-11	2	8.8086046744797	lysosome-associated membrane glyco 1-like			BGLB008836	3.58711922043881e-39	2.17978108480202	0.802	0.305	6.07155799251473e-35	3	9.43641356247042	ganglioside GM2 activator-like			BGLB025453	7.90962215170344e-11	0.36790847002155	0.39	0.127	1.33878264539732e-06
BGLB032766	4.22898200602445e-62	0.402543660523233	1	0.998	7.15797494339698E-58	0	65.7068847938882	40S ribosomal S19; 40S ribosomal S19-like			BGLB007783	4.64716486963984e-34	0.551341290939827	0.994	0.999	7.8657912583524e-30	1	58.9596258640211	heat shock 70 kDa cognate 4			BGLB034895	1.48835164399905e-15	1.64559760090425	0.36	0.143	2.51918399263279e-11	2	3.53660233209424	GTPase IMAP family member 7-like			BGLB007783	4.61238705266331e-39	1.27091293704079	1	0.999	7.80692632533792e-35	3	95.5916057911427	heat shock 70 kDa cognate 4			BGLB003879	1.09411131290704e-10	0.598899808555406	0.878	0.542	1.85189280822645e-06
BGLB017691	6.13005749701219e-62	0.505915402035251	0.996	0.697	1.03757353194428E-57	0	20.5095416053411	spondin-1-like isoform X1			BGLB013333	8.4206520292965e-34	1.13310443956987	0.929	0.932	1.42527956247873e-29	1	13.0089902850712	RNA-binding with serine-rich domain 1			BGLB031736	2.7558705056468e-15	1.46089069530611	0.413	0.195	4.66458641785777e-11	2	2.79461211019706	poly-histidine-tagged ubiquitin			BGLB033248	1.39221200582853e-38	2.16563983820277	0.659	0.199	2.35645804106536e-34	3	5.12504250085052	UPF0748 -like			BGLB031610	1.35203588902931e-10	0.554823811660477	0.902	0.541	2.28845594577101e-06
BGLB013066	9.12184622416413e-62	0.811267276965578	0.91	0.481	1.54396369190202E-57	0	4.73950414322197	glyoxylate reductase hydroxypyruvate reductase-like			BGLB016335	1.15052720337877e-33	0.989919470102905	0.298	0.054	1.94738234443891e-29	1	1.30023476618855	blastula protease 10-like			BGLB013460	5.77162800980346e-15	0.863812918672549	0.28	0.093	9.76905756939334e-11	2	1.15417532677381	cysteine-rich motor neuron 1 isoform X2			BGLB018337	2.41876270217558e-37	1.35288995536387	1	0.991	4.09399774970239e-33	3	100.384925791207	tubulin alpha chain			BGLB017302	2.27913649869255e-10	0.409517304888276	0.683	0.299	3.85766643768702e-06
BGLB017478	2.0001587991738e-61	0.811890680200695	0.544	0.139	3.38546878348157E-57	0	1.19604582624977	peroxidasin homolog			BGLB012829	1.22782221976534e-33	1.48085009875171	0.661	0.388	2.07821188917481e-29	1	3.77968756808179	brain tumor -like			BGLB023884	6.33483573951307e-15	1.19216307405929	0.447	0.233	1.07223429726998e-10	2	2.33286665459487	PREDICTED: uncharacterized protein LOC106077950			BGLB030300	4.78356704503355e-37	1.21772576106662	0.341	0.04	8.09666558042378e-33	3	1.69411736670592	beta,beta-carotene 15,15 -monooxygenase-like			BGLB003385	2.98667309832302e-10	0.314713729824191	0.415	0.142	5.05524288622155e-06
BGLB018512	5.1049757950594e-61	0.751068021371486	0.578	0.171	8.64068203071754E-57	0	1.20110378672374	PREDICTED: uncharacterized protein LOC106050796			BGLB033440	1.8157127333891e-33	1.02092364129575	0.833	0.689	3.07327537253438e-29	1	7.02770276127209	adhesion G protein-coupled receptor L2-like isoform X1			BGLB024693	1.15091139632191e-14	0.990451196733233	0.693	0.554	1.94803262941446e-10	2	4.28738760463495	GTPase IMAP family member 7-like			BGLB022845	1.48992100823581e-36	2.31731558564907	0.462	0.081	2.52184029853993e-32	3	6.81524763113006	low-density lipo receptor-related 2			BGLB011863	3.29050891692879e-10	0.55852883895853	0.939	0.646	5.56951539279366e-06
BGLB017565	5.79371983615952e-61	0.785547126285928	0.589	0.164	9.8064501946836E-57	0	1.37947910395025	C-type lectin domain family 3 member A-like			BGLB010748	5.12562459871272e-33	0.88711898565609	0.923	0.937	8.67563219578115e-29	1	11.8556617770498	SET-like isoform X2			BGLB023907	1.43482805656174e-14	1.65623944567885	0.62	0.437	2.42858996853641e-10	2	7.80145301559719	#N/A			BGLB039860	2.56485923181599e-35	0.966223593137164	0.253	0.021	4.34128073577174e-31	3	1.5859635314121	FMRFamide receptor-like			BGLB005965	3.79563214319818e-10	0.500572765763535	0.866	0.524	6.42448696557724e-06
BGLB022213	7.22519989488352e-61	0.44918099712615	0.996	0.704	1.22293733420799E-56	0	14.7623682543431	fibulin-1-like isoform X1			BGLB036364	7.11294877642464e-33	0.976978639630332	0.28	0.049	1.20393770989763e-28	1	1.17450514032452	PREDICTED: uncharacterized protein LOC106059987			BGLB006210	1.93268385054588e-14	0.949959203881829	0.593	0.364	3.27126068543396e-10	2	7.87645144180722	cathepsin L1-like			BGLB021279	3.11580686183803e-35	1.10451455960769	0.275	0.027	5.27381469434706e-31	3	1.34453280607678	topoisomerase I damage affected protein 7-like			BGLB009550	3.87009249738324e-10	0.483181058284928	0.976	0.824	6.55051856107087e-06
BGLB023192	3.79597765179217e-59	0.939467667903006	0.519	0.124	6.42507177342343E-55	0	1.41310466545668	exoglucanase -like			BGLB010268	1.29916284441077e-32	1.50002187878587	0.381	0.102	2.19896303044967e-28	1	2.25521562010747	cytochrome P450 2E1-like			BGLB021116	3.25940365587494e-14	1.63621645672057	0.433	0.215	5.51686662793393e-10	2	4.67800627007943	#N/A			BGLB030247	2.08273816176706e-33	1.61439157995553	0.407	0.071	3.52524261260692e-29	3	2.4638472738769	PREDICTED: uncharacterized protein LOC106069290			BGLB009551	6.19735958732875e-10	0.536479698892275	0.89	0.55	1.04896508375126e-05
BGLB018176	6.99197046225896e-59	1.07749182163991	0.652	0.221	1.18346092044195E-54	0	4.02004947494062	macrophage mannose receptor 1-like			BGLB039400	1.5773883445786e-32	1.70289534431485	0.702	0.509	2.66988751203373e-28	1	5.83697557084	leukemia inhibitory factor receptor-like isoform X2			BGLB035805	4.11423594509921e-14	1.0236437130878	0.753	0.755	6.96375576067492e-10	2	7.2507420919977	D-amino-acid oxidase			BGLB021817	1.96741970420113e-32	1.32869004385009	0.989	0.954	3.33005459133083e-28	3	18.973440315406	polyubiquitin-B isoform X2			BGLB013725	7.79871716455113e-10	0.331044165452876	0.622	0.254	1.32001086727192e-05
BGLB016631	9.59834830368018e-58	0.637219802211012	0.881	0.416	1.62461643388091E-53	0	3.48496537517722	four and a half LIM domains 2-like			BGLB007378	5.10217029046052e-32	0.393636590822434	1	1	8.63593343363348e-28	1	599.665812768466	ferritin			BGLB033812	4.7048250831511e-14	1.97810558729133	0.833	0.949	7.96338693574155e-10	2	43.8877658017207	nucleolar 58-like isoform X2			BGLB020284	3.50537851955335e-32	1.15401032798618	1	1	5.933203682196e-28	3	88.9710571529394	polyubiquitin-B			BGLB012090	1.00509338971876e-09	0.425503284390246	0.451	0.162	1.70122107143797e-05
BGLB008822	5.01432302852184e-57	0.823812908580536	0.655	0.233	8.48724315807606E-53	0	2.0084791526912	onco -induced transcript 3			BGLB031251	1.44202323553315e-31	1.50607643285694	0.839	0.789	2.44076852846341e-27	1	11.194279632697	Kyphoscoliosis peptidase			BGLB007188	5.56872610894969e-14	1.00349288103399	0.72	0.596	9.42562581200825e-10	2	5.05185260260274	GTPase IMAP family member 7-like			BGLB021025	4.82013427307929e-32	0.941412804398379	0.286	0.032	8.15855927061401e-28	3	1.21319294826548	dystroglycan-like			BGLB036799	1.03305726752544e-09	0.462246167426251	0.756	0.377	1.74855273101355e-05
BGLB030799	3.46916582916805e-56	0.729462941702944	0.502	0.127	5.87191008244984E-52	0	1.01083043300118	6-pyruvoyl tetrahydrobiopterin synthase isoform X8; PREDICTED: uncharacterized protein LOC106080055			BGLB036942	1.80664822625357e-31	1.03591084242557	0.893	0.827	3.05793278775679e-27	1	8.95435188888347	max dimerization 1-like isoform X1			BGLB031267	1.07975925817723e-13	1.52482776338022	0.68	0.517	1.82760052039078e-09	2	7.65500714424889	zinc finger 845-like isoform X2			BGLB018982	7.70619895541596e-32	1.2839412463772	0.33	0.046	1.30435123519371e-27	3	1.72094191985232	solute carrier family 43 member 3-like			BGLB000865	1.06849481062061e-09	0.515271622721876	0.976	0.85	1.80853431645645e-05
BGLB014204	3.67815005027925e-56	0.354846386762669	1	0.997	6.22563677510266E-52	0	90.7585841721426	40S ribosomal S2			BGLB031147	4.09032317439705e-31	1.22535085731584	0.75	0.49	6.92328100498445e-27	1	5.40527087084772	microtubule-associated futsch-like isoform X1			BGLB025875	1.48364790338274e-13	0.890585704269101	0.347	0.143	2.51122244126563e-09	2	1.46357267653871	Baculoviral IAP repeat-containing 7-B			BGLB035874	1.20984690625252e-30	1.04456626671583	0.286	0.035	2.04778687352301e-26	3	1.21346873040446	macrophage-expressed gene 1 -like			BGLB013300	1.30646589068597e-09	0.406606356683287	0.732	0.356	2.21132416657507e-05
BGLB004011	1.82676692333475e-55	0.625785892241906	0.926	0.517	3.0919856944364E-51	0	4.0644513275488	phosphoglycerate mutase			BGLB021080	5.9779254495011e-30	0.911725972006001	0.333	0.076	1.01182366158256e-25	1	1.2938430673265	PREDICTED: uncharacterized protein LOC106057727			BGLB020573	1.69960061489509e-13	1.43391641455411	0.42	0.218	2.87674400077144e-09	2	3.45232553784229	alpha-1-antitrypsin-like			BGLB007348	7.98139644907654e-30	1.9759385454272	0.879	0.74	1.3509311629707e-25	3	13.1857598793078	NPC2 homolog			BGLB000123	1.90506213243731e-09	0.379814010060449	0.524	0.216	3.22450816536339e-05
BGLB039946	2.433862233146e-55	0.68656007352437	0.642	0.221	4.11955521582292E-51	0	1.53208872060147	DNA-directed RNA polymerase subunit beta&apos			BGLB017670	2.63574433104877e-29	0.943853088578847	0.929	0.911	4.46126085473315e-25	1	13.5285167301403	#N/A			BGLB005986	2.41804671782476e-13	1.15547181009405	0.613	0.404	4.09278587459019e-09	2	10.5520240617893	cathepsin L1-like			BGLB019914	9.50370225193056e-30	0.939392815091515	0.253	0.028	1.60859664316177e-25	3	1.01677734293693	#N/A			BGLB005038	3.74224790436832e-09	0.358771934487374	0.659	0.306	6.33412880293382e-05
BGLB027178	4.45500339663286e-55	1.00415721149006	0.569	0.174	7.54053874914078E-51	0	2.27525363359163	Cysteine-rich, acidic integral membrane protein			BGLB027270	3.74089109973657e-29	1.33542561794075	0.714	0.537	6.33183227541411e-25	1	4.45905500458504	Dimethyladenosine transferase mitochondrial			BGLB011609	2.6229008343826e-13	1.4374028285428	0.653	0.55	4.43952195227599e-09	2	5.17644557576899	syndecan-like isoform X1			BGLB011592	1.66807595055477e-29	0.983816849790015	0.253	0.028	2.823385353909e-25	3	1.09970600098613	PREDICTED: uncharacterized protein LOC106077643 isoform X1			BGLB011552	4.69192887418464e-09	0.526845852470665	0.915	0.644	7.94155881244492e-05
BGLB038874	2.6805601342087e-54	0.80187639683304	0.536	0.152	4.53711608316165E-50	0	1.32516217148169	methyltransferase 24			BGLB030452	2.31799750242537e-28	0.967140914883001	0.304	0.07	3.92344257260519e-24	1	1.20058718029476	PREDICTED: uncharacterized protein LOC106058099			BGLB000163	3.04345929234948e-13	1.16591231756397	0.753	0.829	5.15135919823074e-09	2	7.87167223591077	probable glutathione S-transferase 7			BGLB031770	1.41207522168597e-28	2.52387981175979	0.56	0.182	2.39007852022568e-24	3	6.43027760950169	#N/A			BGLB025673	5.03910892298987e-09	0.437796667022546	0.744	0.391	8.52919576305266e-05
BGLB002002	4.51945679960959e-54	0.707228165675168	0.833	0.387	7.64963257901919E-50	0	3.26469290208836	fascin-like			BGLB010848	2.7174121478128e-28	1.40541230615321	0.524	0.238	4.59949180138794e-24	1	2.6937931252606	Cathepsin F			BGLB004909	1.25122736437907e-12	0.55128526287803	0.353	0.129	2.11782743694802e-08	2	1.87476219703175	PREDICTED: uncharacterized protein LOC106060241			BGLB011680	1.4735425693665e-28	1.30977489604782	0.374	0.068	2.49411815290974e-24	3	1.88194226683126	ras-like GTP-binding Rho1 isoform X3			BGLB013162	6.32667128038075e-09	0.319449579885568	0.402	0.145	0.000107085238091724
BGLB007243	3.22925606172149e-53	0.730013318503988	0.869	0.486	5.4658388100698E-49	0	3.4943738291307	N(G),N(G)-dimethylarginine dimethylaminohydrolase 1-like			BGLB014434	7.841091464654e-28	1.39940995272582	0.72	0.517	1.32718314130734e-23	1	5.35037568705326	metallothionein-like isoform X2; keratin-associated 5-8-like isoform X1			BGLB037391	1.30090275198409e-12	1.7444500043946	0.587	0.444	2.20190799800827e-08	2	8.80177524210197	PREDICTED: uncharacterized protein LOC106056444			BGLB016738	1.24208099396094e-27	1.99207041014052	0.637	0.249	2.10234629037828e-23	3	5.09499923854341	proactivator polypeptide-like			BGLB028280	7.28696499151246e-09	0.361965236360251	0.451	0.181	0.00012333916944634
BGLB010280	7.45729972529257e-53	0.694583154393244	0.671	0.263	1.26222255150302E-48	0	1.73880834633357	peptidoglycan-recognition SC2-like			BGLB032245	1.54726093335409e-27	0.948008004529777	0.869	0.877	2.61889385579514e-23	1	7.39621491564718	BRICK1			BGLB007348	5.62033089832001e-12	1.11877587387609	0.72	0.748	9.51297207849645e-08	2	7.13269153617708	NPC2 homolog			BGLB028972	3.34029513093758e-27	1.06460045163187	0.308	0.047	5.65378353862495e-23	3	1.34801583016448	toll-like receptor 4			BGLB014101	8.61850834635582e-09	0.275362734974689	0.585	0.246	0.000145876872270419
BGLB006506	1.1762273692119e-52	0.71770374586052	0.502	0.129	1.99088244512807E-48	0	1.05552906472084	ras-like GTP-binding Rho1 isoform X1			BGLB030509	4.17979191316404e-27	1.21137802011298	0.47	0.187	7.07471579222145e-23	1	2.10098199693713	dedicator of cytokinesis 3 isoform X2; dedicator of cytokinesis 3 isoform X1			BGLB009014	6.24710200643298e-12	0.819829914825562	0.367	0.175	1.05738448560885e-07	2	1.35246815732805	E3 ubiquitin- ligase RLIM-like			BGLB020624	5.52590851263175e-26	1.25958833202289	0.319	0.055	9.3531527484805e-22	3	1.55825438663368	PREDICTED: uncharacterized protein LOC106078290			BGLB018049	9.80073205152171e-09	0.404109526105005	0.756	0.397	0.000165887190704056
BGLB006327	1.74204216460894e-52	0.715523483828933	0.63	0.211	2.94858056781709E-48	0	1.68862250909712	PREDICTED: uncharacterized protein LOC106063632			BGLB018317	7.95125680358624e-27	0.969672322728443	0.833	0.822	1.34582972657501e-22	1	7.18630045076621	tubulin alpha chain			BGLB025297	7.72354195860214e-12	1.08178271599985	0.52	0.324	1.307286711913e-07	2	3.45026395288891	#N/A			BGLB034658	7.7035917439416e-26	1.34564401574397	0.385	0.082	1.30390993857956e-21	3	1.85984422553077	#N/A			BGLB013335	9.93438215291426e-09	0.398435953107523	0.537	0.232	0.000168149352320227
BGLB027829	1.87135520947489e-52	0.583232727399879	0.795	0.38	3.16745582755721E-48	0	2.61643521606793	gelsolin 2			BGLB028667	3.0795828672916e-26	0.613246423106497	0.982	0.986	5.21250196117776e-22	1	22.5271132896542	U6 snRNA-associated Sm LSm3			BGLB033440	9.49861760859057e-12	2.37381436714979	0.693	0.701	1.60773601643004e-07	2	16.2000332862285	adhesion G protein-coupled receptor L2-like isoform X1			BGLB037695	1.07563077875903e-25	1.15825607475089	0.319	0.055	1.82061265612753e-21	3	1.44888163145251	probable chitinase 3			BGLB006464	1.05456609636502e-08	0.283727508170356	0.439	0.167	0.000178495857470743
BGLB027589	2.95666689673261e-52	0.874087950660001	0.779	0.392	5.00445438940961E-48	0	5.12135089022893	Photosystem II stability/assembly factor HCF136, chloroplastic			BGLB031267	3.49468730887211e-26	1.06936973808147	0.732	0.511	5.91510773899693e-22	1	5.56963322263709	zinc finger 845-like isoform X2			BGLB001536	1.23050412903047e-11	1.00628751682863	0.347	0.163	2.08275128879697e-07	2	1.76044060647973	Zinc finger 771			BGLB031267	1.39376439547486e-25	1.97321957335202	0.791	0.517	2.35908561578074e-21	3	10.8834996039056	zinc finger 845-like isoform X2			BGLB016402	1.14402303998382e-08	0.261145845187226	0.476	0.184	0.000193637339747662
BGLB038407	9.38679322879316e-52	1.1264324271613	0.507	0.134	1.58880862190553E-47	0	2.44499673133391	zwei Ig domain protein zig-4-like			BGLB000222	2.57659284588917e-25	0.973889406442583	0.923	0.937	4.36114105095202e-21	1	18.593487521084	antimicrobial peptide hydramacin			BGLB016738	1.56139290964872e-11	0.864925749464839	0.44	0.253	2.64281363887142e-07	2	1.96850138123198	proactivator polypeptide-like			BGLB018951	1.74888762307479e-24	1.87477571614051	0.824	0.632	2.9601671908164e-20	3	10.4512546694705	PREDICTED: uncharacterized protein LOC106055297 isoform X1			BGLB002089	1.4620908078301e-08	0.444507054086481	0.939	0.839	0.000247473490133322
BGLB036594	1.07426188602146e-51	0.729592803310778	0.956	0.544	1.81829566827993E-47	0	13.2092360546544	Toll-like receptor 4			BGLB003508	3.81036766622912e-25	1.07021696809535	0.804	0.763	6.4494283118594e-21	1	6.04667467611089	#N/A			BGLB032718	2.28167595498655e-11	1.23094900609491	0.28	0.114	3.86196472141024e-07	2	1.87313823954239	PREDICTED: uncharacterized protein LOC106057660			BGLB023359	1.55978730654425e-23	1.10874265135358	0.264	0.04	2.6400959950568e-19	3	1.34116932445057	PREDICTED: uncharacterized protein LOC106053920			BGLB010516	2.74030140916925e-08	0.358868459917802	1	0.964	0.000463823416515987
BGLB008114	1.13032830534455e-51	0.614997371195093	0.973	0.662	1.91319368962619E-47	0	6.25855383359613	fructose-bisphosphate aldolase-like			BGLB040438	5.02198201252146e-25	0.79864926628711	0.911	0.909	8.50020675439383e-21	1	9.66985742927406	PREDICTED: uncharacterized protein LOC106057551 isoform X2			BGLB016312	3.33189827226411e-11	0.530272113587325	0.327	0.137	5.63957101563423e-07	2	1.37019874039737	PREDICTED: uncharacterized protein LOC106057491			BGLB004273	1.33368307065181e-22	1.2499866670105	0.967	0.936	2.25739196538526e-18	3	15.9652298427522	cystatin-B			BGLB013770	3.05375914842849e-08	0.456241873059503	0.976	0.944	0.000516879273463006
BGLB036761	1.54614575012662e-51	0.619821354393794	0.676	0.256	2.61700629666431E-47	0	1.5799412749991	ABC transporter F family member 4-			BGLB018754	2.16033625721663e-24	0.61510308576921	0.952	0.961	3.65658514896487e-20	1	10.9547524131471	ATP synthase-coupling factor mitochondrial			BGLB006409	3.74713378205918e-11	0.780170382839048	0.32	0.146	6.34239863951337e-07	2	1.14802064357945	alpha-L-fucosidase-like			BGLB039021	1.84531687517734e-22	1.36788374166528	0.901	0.815	3.12338334292517e-18	3	11.2077420133116	#N/A			BGLB013639	3.4325259715958e-08	0.440277887664663	0.951	0.766	0.000580989345952306
BGLB024096	3.17336414303187e-51	0.704455600331067	0.728	0.305	5.37123614849574E-47	0	2.18564765516895	Hematopoietically-expressed homeobox protein hhex			BGLB000730	7.01425884750479e-24	0.684133604377025	0.97	0.985	1.18723345252866e-19	1	23.4599076801036	LLP homolog			BGLB012009	5.51318958648413e-11	0.593471198483884	0.92	0.973	9.33162469408304e-07	2	11.7581975251304	gamma-aminobutyric acid receptor-associated			BGLB039993	2.34335859933062e-22	1.55099693736024	0.516	0.181	3.96636876522701e-18	3	2.99956439232481	#N/A			BGLB031079	5.77919112700444e-08	0.304995550085316	0.427	0.166	0.000978185890156771
BGLB028403	3.23999898416359e-51	0.661101099264434	0.514	0.138	5.48402228059529E-47	0	1.04056109161919	PREDICTED: uncharacterized protein LOC106075217			BGLB038538	7.11052343093568e-24	0.881083080863481	0.333	0.089	1.20352719592017e-19	1	1.52699474325164	PREDICTED: uncharacterized protein LOC106061867			BGLB036438	6.72372650142117e-11	2.00082242549093	0.527	0.41	1.13805794763055e-06	2	9.43004929239348	serpin B6-like			BGLB031147	1.97313349207945e-21	1.51831806654621	0.769	0.499	3.33972574869368e-17	3	7.03057240396538	microtubule-associated futsch-like isoform X1			BGLB002973	6.02472871866355e-08	0.281347135111268	0.512	0.218	0.00101974558292099
BGLB026075	3.30520398760887e-51	0.682850090064139	0.954	0.587	5.59438826942678E-47	0	7.68276943237972	PREDICTED: uncharacterized protein LOC106059531			BGLB033114	8.33684083622535e-24	1.22423429260642	0.446	0.186	1.4110936799395e-19	1	2.12996414887168	sterol 3-beta-glucosyltransferase-like			BGLB027768	9.43389106819966e-11	0.700428144870391	0.52	0.352	1.59678040220348e-06	2	1.75146579361273	#N/A			BGLB002788	3.69749769348842e-21	1.57656187271649	0.407	0.114	6.2583845959985e-17	3	2.50981140298918	elongation of very long chain fatty acids 2-like			BGLB008903	6.46316801839387e-08	0.304686193581501	0.659	0.308	0.00109395581879335
BGLB040215	1.00468789959986e-50	0.589992839153108	0.966	0.601	1.70053473886272E-46	0	5.57102142035051	E3 ubiquitin-protein ligase makorin			BGLB031908	1.06291109072195e-23	0.940133602829152	0.893	0.897	1.79908331215597e-19	1	9.74511604349964	#N/A			BGLB032944	1.51620932936467e-10	1.13344625320504	0.753	0.878	2.56633591088264e-06	2	10.8926746207115	ependymin-related 1-like			BGLB002603	4.33783284108597e-21	1.68233956606395	0.802	0.719	7.34221586682212e-17	3	9.76706630934123	digestive cysteine ase 1			BGLB027213	7.28500235574827e-08	0.369380351898502	0.598	0.274	0.00123305949873395
BGLB027156	1.14189878792248e-50	0.676050526611515	0.538	0.16	1.93277788843759E-46	0	1.13030663999272	ATP-binding cassette sub-family A member 5-like isoform X2			BGLB010849	2.51605845978817e-23	1.36006892344206	0.53	0.29	4.25868054903746e-19	1	2.76501966784989	cytochrome c oxidase assembly factor 6 homolog			BGLB039993	1.72484037074403e-10	0.714797185265306	0.367	0.182	2.91946481152135e-06	2	1.31798455177656	#N/A			BGLB012721	3.42559633694616e-20	1.45343603976665	0.418	0.119	5.79816435991507e-16	3	2.49762896540419	group XV phospholipase A2-like			BGLB026508	8.41058728000192e-08	0.339170515298516	0.707	0.357	0.00142357600301312
BGLB007367	7.6129626645965e-50	1.0158072327922	0.435	0.089	1.2885700606096E-45	0	1.47486402672062	PREDICTED: uncharacterized protein LOC106066356 isoform X1			BGLB006933	3.28227092810936e-23	1.31239274822597	0.333	0.104	5.55557177291791e-19	1	1.86851664991969	erythrocyte membrane-associated giant antigen 332			BGLB008655	1.96007181188341e-10	0.712335411921378	0.287	0.125	3.31761754879386e-06	2	0.968771254346696	major facilitator superfamily domain-containing 1-like			BGLB000961	1.7182139058037e-19	0.836281852787901	0.978	0.977	2.90824885696334e-15	3	15.2547005987218	coiled-coil-helix-coiled-coil-helix domain-containing mitochondrial			BGLB033976	1.06564659939961e-07	0.469170422734955	0.915	0.663	0.00180371343414378
BGLB003224	1.2384592081079e-48	0.687857444118342	0.935	0.561	2.09621605564343E-44	0	4.89021094565261	alpha- sarcomeric-like isoform X1			BGLB032828	6.18093376570651e-23	1.32306011741817	0.571	0.299	1.04618484918348e-18	1	5.13985657739185	---NA---			BGLB000151	3.00083811921172e-10	1.06550761765653	0.48	0.315	5.07921860057775e-06	2	2.60164982582088	baculoviral IAP repeat-containing 7; inhibitor of apoptosis			BGLB028218	3.8284288436911e-19	1.22407092076971	0.352	0.086	6.47999866083155e-15	3	1.83549986737993	transcription initiation factor TFIID subunit 1-like			BGLB003607	1.13658908560898e-07	0.336760899744583	0.707	0.359	0.00192379068630175
BGLB033865	2.26327213776991e-48	0.635297793227066	0.588	0.199	3.83081442038936E-44	0	1.26755408517811	Myosin-10			BGLB005061	2.81336621643893e-22	0.880382353097305	0.827	0.798	4.76190365794454e-18	1	6.12994585245717	allograft inflammatory factor			BGLB001930	3.12685111717203e-10	0.749904358508243	0.407	0.223	5.29250820092538e-06	2	1.84411731510354	lethal(2) giant larvae homolog 1-like			BGLB010381	6.98990223860218e-19	1.06688341967283	0.923	0.913	1.18311085290581e-14	3	12.6664349817761	tandem repeat galectin			BGLB033257	1.18222912835939e-07	0.448227933922208	0.829	0.493	0.0020010410226611
BGLB032314	4.12017563292494e-47	0.631622491636938	0.783	0.373	6.97380927628875E-43	0	2.3820045629217	cyclic AMP-responsive element-binding 3 2			BGLB010764	4.3898031188674e-22	1.09172558166224	0.714	0.643	7.43018075899495e-18	1	4.15447327084286	splicing factor 3A subunit 2-like			BGLB012750	5.79855743719286e-10	1.22256501303603	0.673	0.682	9.81463831819264e-06	2	5.24358052749677	glutamine synthetase 2 cytoplasmic-like			BGLB029270	3.86080615426743e-18	1.92598118206183	0.813	0.691	6.53480049671306e-14	3	24.8549361986972	PREDICTED: uncharacterized protein LOC106069423 isoform X2			BGLB038818	1.79127047402838e-07	0.329494851227002	0.61	0.3	0.00303190440434043
BGLB004891	1.98022248758357e-46	0.781182213699585	0.46	0.122	3.35172458248396E-42	0	1.20385399893018	pro-neuregulin- membrane-bound isoform isoform X4			BGLB034573	7.87335578125018e-22	1.13248243031408	0.738	0.691	1.33264419953441e-17	1	5.73387386257443	destrin			BGLB000805	8.17163700347052e-10	2.03014146024893	0.573	0.523	1.38313127920742e-05	2	8.05232042924514	dipeptidyl peptidase 1-like isoform X1; dipeptidyl peptidase 1 isoform X1			BGLB028227	2.86058120062449e-17	1.16460577573019	0.352	0.095	4.84181974017701e-13	3	1.8618203253047	D(2) dopamine receptor A-like isoform X1			BGLB021669	1.86922909200428e-07	0.272748369387374	0.329	0.118	0.00316385716112645
BGLB007973	3.31012419329604e-46	0.677249236727809	0.63	0.247	5.60271620957287E-42	0	1.64293995381169	homeobox cut-like 1 isoform X2			BGLB003231	9.15831491864917e-22	1.21051643954373	0.464	0.216	1.55013638313056e-17	1	2.17952182768553	iron zinc purple acid phosphatase			BGLB024814	9.49051707911818e-10	0.87435546461628	0.533	0.389	1.60636492081154e-05	2	2.24863637446039	spermine oxidase-like			BGLB002003	3.1594787820161e-17	1.62762901103692	0.549	0.268	5.34773378644045e-13	3	3.47210702567159	cytochrome c oxidase assembly mitochondrial			BGLB025551	1.89237301622808e-07	0.302651228779963	0.537	0.24	0.00320303056726765
BGLB031596	3.79994295269125e-46	0.574776282479684	0.66	0.268	6.4317834417252E-42	0	1.52128576848032	angiopoietin-related protein 2-like isoform X1			BGLB037781	1.14202474893979e-21	0.828596976676006	0.827	0.859	1.93299109005549e-17	1	6.1314788584637	#N/A			BGLB000154	1.23563372309347e-09	1.17201981367855	0.633	0.58	2.091433639708e-05	2	4.76460034825436	baculoviral IAP repeat-containing protein 7-like			BGLB001989	3.60605741065551e-17	1.21021742264098	0.89	0.889	6.10361277327552e-13	3	12.7125596819468	Histidine triad nucleotide-binding 1			BGLB028134	2.00506335576924e-07	0.313799799098428	0.683	0.35	0.00339377023597501
BGLB012098	1.81477134165226e-45	0.861215105969847	0.588	0.216	3.07168197288062E-41	0	2.08373140697065	very low-density lipo receptor-like isoform X1			BGLB027726	2.06306121480823e-21	0.68328202294204	0.982	0.982	3.49193741218441e-17	1	21.5953875651577	basic region leucine zipper transcription			BGLB038657	2.52326725869818e-09	0.710178490558838	0.673	0.594	4.27088216207254e-05	2	3.76490607833315	homolog isoform X1; homolog isoform X2			BGLB026957	4.42533888870822e-17	0.866376500255377	0.253	0.049	7.49032860302754e-13	3	1.06141288833995	TNF receptor-associated factor 4			BGLB026346	2.29075412969832e-07	0.442841390625086	0.841	0.531	0.00387733043992737
BGLB034947	1.82098455768069e-45	0.618956056480392	0.715	0.324	3.08219846233033E-41	0	1.86611863577112	#N/A			BGLB002354	6.34912689623839e-21	0.480566892625527	0.982	0.991	1.07465321845731e-16	1	22.5184731539956	radixin isoform X1			BGLB023533	2.59631646066653e-09	0.878484666725873	0.427	0.262	4.39452524132417e-05	2	1.79490627104956	tumor necrosis factor receptor superfamily member 1A-like			BGLB025197	5.55342389516567e-17	1.58117998716785	0.78	0.685	9.39972528495742e-13	3	7.87298509983462	#N/A			BGLB003729	2.39812254322589e-07	0.372006755940197	0.817	0.495	0.00405906221666415
BGLB034095	3.17676201981904e-45	0.596153876661608	0.49	0.148	5.37698739474571E-41	0	0.910305840341282	bactericidal permeability-increasing -like			BGLB002111	7.54010460630013e-21	0.801233772170637	0.845	0.879	1.27623810566236e-16	1	7.09246548279488	small nuclear ribonucleo Sm D3			BGLB033377	2.66114397956171e-09	1.18782235015366	0.7	0.757	4.50425229980615e-05	2	7.08818448771358	PREDICTED: uncharacterized protein LOC106078069			BGLB000105	1.89908661949506e-16	1.37289290818959	0.681	0.501	3.21439401215734e-12	3	4.17643249429996	CD40 ligand-like			BGLB002444	2.80045777436297e-07	0.299486196663726	0.488	0.22	0.00474005482888676
BGLB037273	4.15227368136573e-45	0.844994207836054	0.722	0.331	7.02813843307964E-41	0	3.88417798072486	gastric intrinsic factor			BGLB039021	2.69114430006158e-20	0.906255399706301	0.845	0.816	4.55503084228423e-16	1	7.85349157118068	#N/A			BGLB002365	2.68124077716553e-09	0.744888218818426	0.32	0.159	4.53826813943037e-05	2	1.11720890446212	phospholipase B-like 1			BGLB014445	2.77447828567073e-16	1.48044740460785	0.736	0.616	4.69608194632627e-12	3	6.21564003825721	tyrosine- phosphatase non-receptor type 11-like isoform X1			BGLB007319	3.23216271070233e-07	0.370295879558665	0.634	0.324	0.00547075860413477
BGLB037420	4.57677243638223e-45	0.584876949928826	0.781	0.347	7.74664502582057E-41	0	2.23265285132776	PREDICTED: uncharacterized protein LOC106080008			BGLB002472	4.73934941518313e-20	0.824076575451125	0.863	0.889	8.02182282013896e-16	1	8.06682777172301	phenylalanine--tRNA ligase alpha subunit			BGLB013054	1.17352610963567e-08	0.879992683296876	0.507	0.383	0.000198631029316933	2	2.26383446099001	thymidine phosphorylase			BGLB037079	5.22048929948502e-16	1.29395353245376	0.407	0.143	8.83620018830834e-12	3	2.03739149049409	mediator of RNA polymerase II transcription subunit 15 isoform X3			BGLB034343	3.56036409634269e-07	0.397941898153437	0.976	0.748	0.00602627226946964
BGLB026531	1.71993748998518e-44	0.612230830160558	0.855	0.455	2.91116619554892E-40	0	3.08137023609727	keratinocyte-associated 2-like isoform X1			BGLB003743	7.56301776625775e-20	0.690530274822717	0.857	0.874	1.28011638711679e-15	1	6.09325073210051	splicing factor 3B subunit 6			BGLB000759	1.18988972886502e-08	1.87138962199859	0.56	0.502	0.000201400735507693	2	6.97088301754745	serine--tRNA cytoplasmic			BGLB031908	7.63396989023266e-16	1.24415034657773	0.846	0.899	1.29212574362078e-11	3	12.4361480742685	#N/A			BGLB035781	5.1227099064904e-07	0.268910714887206	0.378	0.157	0.00867069878772565
BGLB001911	6.5949174424331e-44	0.603401351163619	0.683	0.287	1.11625572630623E-39	0	1.71736651800463	cGMP-dependent kinase 1-like			BGLB008330	1.14463911512691e-19	0.812760499057831	0.25	0.066	1.9374161662638e-15	1	0.95360067734545	7-dehydrocholesterol reductase			BGLB038380	1.31076920180698e-08	1.30521175615945	0.587	0.567	0.000221860795097849	2	4.56504204393055	perilipin-2 isoform X1			BGLB010804	1.55118082522375e-15	1.5459237867256	0.67	0.457	2.62552866477372e-11	3	5.35336286231635	cathepsin D			BGLB010942	5.29943097798035e-07	0.63099857117252	0.963	0.779	0.00896981687332954
BGLB012880	7.61593452355506e-44	0.554489334683427	0.48	0.132	1.28907307745693E-39	0	0.877951034807651	galactose-3-O-sulfotransferase 2-like isoform X2			BGLB030583	1.14638018276078e-19	0.635033534017413	0.958	0.954	1.94036309734089e-15	1	14.1506598291175	#N/A			BGLB005793	1.34148398124987e-08	0.697077498673175	0.36	0.204	0.000227059578666353	2	1.15943905500628	tribbles homolog 2 isoform X2			BGLB014323	2.83714802086516e-15	1.06412098687218	0.846	0.836	4.80215674011637e-11	3	7.19292661152562	reactive oxygen species modulator 1			BGLB019939	6.37933338009306e-07	0.68807999623381	0.805	0.598	0.0107976596791455
BGLB008167	1.83931645573375e-43	0.634854474608749	0.766	0.364	3.11322703297494E-39	0	2.3628087877775	#N/A			BGLB025165	2.09049724049058e-19	1.15809992986369	0.637	0.512	3.53837562925435e-15	1	3.85226365726459	docking protein 2-like			BGLB034038	1.39682072809267e-08	1.0596217893852	0.627	0.54	0.000236425876436966	2	4.6131992152499	#N/A			BGLB032829	3.17636000642288e-15	1.60304079390659	0.495	0.225	5.37630694687136e-11	3	3.37478576924303	PREDICTED: uncharacterized protein LOC106058684 isoform X2			BGLB016922	6.59153692035677e-07	0.330354810871879	0.622	0.325	0.0111568353913959
BGLB000859	7.19064072229739e-43	0.572203456222508	0.669	0.28	1.21708784865606E-38	0	1.8017805454935	Regulator of G-protein signaling 3			BGLB012034	3.79361095664885e-19	0.800333976798652	0.851	0.853	6.42106590522384e-15	1	8.31396117344344	Glucose-dependent insulinotropic receptor			BGLB032922	1.50783986508935e-08	0.993211800146943	0.353	0.206	0.000255216975565024	2	1.62302950190636	translocation SEC62-like			BGLB024682	3.99778564602275e-15	0.958716712396697	0.835	0.831	6.76665198445811e-11	3	7.09798383493385	PREDICTED: uncharacterized protein LOC106058561			BGLB017907	7.43540450928385e-07	0.353838428591442	0.988	0.944	0.0125851656724138
BGLB027731	3.77306280807718e-42	0.523725015724329	0.654	0.27	6.38628610895144E-38	0	1.46978022765484	phosphoglycolate phosphatase-like isoform X1; phosphoglycolate phosphatase-like isoform X2			BGLB000961	6.43109199090882e-19	0.554281289125464	0.97	0.978	1.08852663038123e-14	1	12.3261731011769	coiled-coil-helix-coiled-coil-helix domain-containing mitochondrial			BGLB026136	1.65756952305264e-08	1.268485095722	0.327	0.181	0.000280560217471889	2	2.31375939579128	dipeptidyl peptidase 2-like			BGLB020558	4.85112764216656e-15	0.656227930958424	0.989	0.986	8.21101864713112e-11	3	36.046953017255	#N/A			BGLB007989	7.80555846643723e-07	0.337464874589521	0.793	0.457	0.0132116882602917
BGLB009395	4.043098971758e-42	0.642576444276814	0.767	0.382	6.8433493195976E-38	0	2.31728811427811	pro convertase subtilisin kexin type 6 isoform X2			BGLB013717	7.88831193675449e-19	0.805647749961744	0.25	0.068	1.33517567841507e-14	1	0.968025802550133	PREDICTED: uncharacterized protein LOC106052497			BGLB002437	2.10932859926174e-08	0.418739911027322	0.933	0.968	0.000357024958711042	2	9.06195532175772	guanine nucleotide-binding subunit gamma-1-like; guanine nucleotide-binding G(I) G(S) G(O) subunit gamma-12-like			BGLB026767	1.1255765599935e-14	1.35506870618973	0.484	0.222	1.905150885445e-10	3	2.60639704948238	#N/A			BGLB037062	7.9755578145103e-07	0.445920898541102	0.963	0.778	0.0134994291568401
BGLB026773	7.02718564604677e-42	0.556334752929379	0.529	0.181	1.18942144244988E-37	0	1.03523429181288	peptidase inhibitor 16			BGLB002437	3.02399954327003e-18	0.534292516119188	0.905	0.97	5.11842162693886e-14	1	9.78189003701981	guanine nucleotide-binding subunit gamma-1-like; guanine nucleotide-binding G(I) G(S) G(O) subunit gamma-12-like			BGLB026767	3.06828309669973e-08	0.70475571726162	0.38	0.222	0.000519337596947396	2	1.34530660498001	#N/A			BGLB016920	1.24713893720495e-14	2.13428937072908	0.549	0.284	2.11090736511309e-10	3	8.68070346769238	macrophage-expressed gene 1 -like			BGLB009927	8.23410532871365e-07	0.31474002754712	0.817	0.472	0.0139370466793807
BGLB035734	1.09542016471212e-41	0.561950118982212	0.613	0.242	1.85410817079173E-37	0	1.34312210441536	neuroplastin-like isoform X1			BGLB033554	3.87186829844202e-18	1.1628715420419	0.518	0.316	6.55352428194295e-14	1	2.57306612450998	nucleolysin TIAR-like isoform X4			BGLB001537	3.29280739763679e-08	0.950692060910313	0.38	0.23	0.000557340580124003	2	1.81724237483713	PREDICTED: uncharacterized protein LOC106055486 isoform X1			BGLB008126	2.90975894353063e-14	1.31995971720706	0.67	0.518	4.92505798781994e-10	3	4.36561780290901	SLIT-ROBO Rho GTPase-activating 1-like isoform X4; SLIT-ROBO Rho GTPase-activating 1-like isoform X6; SLIT-ROBO Rho GTPase-activating 1-like isoform X3; SLIT-ROBO Rho GTPase-activating 1-like isoform X5			BGLB035668	8.47652844684617e-07	0.422999695921936	0.951	0.778	0.0143473720491318
BGLB020455	1.15768923383566e-41	0.452916996145892	0.61	0.23	1.95950479719024E-37	0	1.30521087712368	PREDICTED: uncharacterized protein LOC106079387 isoform X1			BGLB036354	3.20820045069422e-17	0.869596809235139	0.804	0.828	5.43020008284504e-13	1	6.96626203013312	#N/A			BGLB034511	3.94268700480292e-08	0.786694588527938	0.68	0.669	0.000667339202432942	2	3.96983955460235	baculoviral IAP repeat-containing 2			BGLB025952	6.29418101508127e-14	1.24689638193834	0.692	0.531	1.06535307861266e-09	3	4.98597120981684	shootin-1-like isoform X1			BGLB020893	1.01476917870073e-06	0.515219472172675	0.622	0.353	0.0171759831186886
BGLB025256	1.53947459756781e-41	0.551249638109206	0.573	0.214	2.60571470384327E-37	0	1.28111300606643	complement C3-like			BGLB028394	3.67654250271e-17	0.508546839837416	0.976	0.97	6.22291584008695e-13	1	10.8680548608503	#N/A			BGLB033355	8.073443071919e-08	0.663828578474733	0.26	0.125	0.00136651097435301	2	0.884091685241371	PREDICTED: uncharacterized protein LOC106077440			BGLB003957	9.73208705186484e-14	1.15827210630094	0.286	0.08	1.64725305439864e-09	3	1.49838577977847	integral membrane GPR155-like isoform X1			BGLB002357	1.20258098064463e-06	0.353791077418771	0.72	0.407	0.020354885678391
BGLB012236	9.23214004827725e-41	0.444607943968685	0.998	0.897	1.56263202457141E-36	0	21.9306149840201	coactosin			BGLB002089	4.76208706763637e-17	0.775142242795721	0.815	0.845	8.06030857068133e-13	1	5.75643246280812	SUMO-conjugating enzyme UBC9-B			BGLB001364	8.69394324143257e-08	0.600603950816832	0.647	0.617	0.00147153683304488	2	2.73592434678071	V-type proton ATPase subunit F			BGLB006610	1.22305943783682e-13	0.793024644764543	0.934	0.942	2.07015040448261e-09	3	14.2595252799234	V-type proton ATPase 16 kDa proteolipid subunit			BGLB025081	1.30889390772161e-06	0.394110097634841	0.695	0.387	0.022154338282096
BGLB009605	1.10386584348387e-40	0.585505605897835	0.834	0.43	1.8684033266808E-36	0	3.25344029871785	CD9 antigen			BGLB028218	5.09348079615425e-17	0.911476339036898	0.268	0.083	8.62122559557069e-13	1	1.25735381959455	transcription initiation factor TFIID subunit 1-like			BGLB016943	9.39719919028065e-08	0.967534992007797	0.593	0.511	0.0015905699349469	2	4.64019222112231	GTPase IMAP family member 7-like			BGLB002036	3.00009435764129e-13	0.938535034054229	0.89	0.943	5.07795970974364e-09	3	11.7359199248908	Sex muscle abnormal 5			BGLB013837	1.57728085112104e-06	0.308093677840147	0.817	0.493	0.0266970556860748
BGLB037943	1.94954949973235e-40	0.525042060171874	0.587	0.223	3.29980748324697E-36	0	1.25118627200647	very long-chain acyl- synthetase-like			BGLB017367	6.57201763465226e-17	0.897757642611791	0.798	0.779	1.11237970484124e-12	1	7.0962178094186	chromobox homolog 6			BGLB031582	1.12223360318531e-07	0.903275650184172	0.28	0.141	0.00189949259675146	2	1.39525500622896	GTPase IMAP family member 7-like			BGLB003230	1.34467768776196e-12	1.50776051633809	0.648	0.51	2.27600145430589e-08	3	5.20041648441219	iron zinc purple acid phosphatase			BGLB027782	1.93125645344811e-06	0.326901789306429	0.744	0.45	0.0326884467310627
BGLB010412	2.14850527673618e-40	0.295862901515112	1	0.986	3.63656003140366E-36	0	39.5005662489521	40S ribosomal S13			BGLB007626	9.35574016097744e-17	0.652058681138607	0.911	0.887	1.58355257964704e-12	1	9.36698135559816	serine threonine- kinase PAK 3-like			BGLB011796	1.25245961064855e-07	0.924328338492583	0.427	0.304	0.00211991313698374	2	2.02000974445796	granulins-like isoform X4			BGLB023954	1.3947663904698e-12	1.10994333694296	0.374	0.142	2.36078159250919e-08	3	1.80333442088053	#N/A			BGLB007890	1.94453670409721e-06	0.313927081763754	0.61	0.322	0.0329132282535493
BGLB006412	7.73033014320911e-40	0.544814532310576	0.89	0.493	1.30843568003957E-35	0	3.61089975191282	disulfide isomerase			BGLB022559	1.1711377267462e-16	0.897582228920169	0.786	0.851	1.98226771629061e-12	1	6.74340144463717	transcription initiation factor TFIID subunit 3-like isoform X2			BGLB023738	1.33946517918638e-07	1.40038708673593	0.727	0.7	0.00226717876229087	2	9.8010661323723	#N/A			BGLB005061	2.30657989174096e-12	1.06799350297699	0.802	0.8	3.90411712476074e-08	3	7.26703998192863	allograft inflammatory factor			BGLB022765	2.52814581780378e-06	0.463212828301535	1	0.779	0.0427913961121468
BGLB034855	1.84202063375052e-39	0.509994350665299	0.605	0.24	3.11780412468613E-35	0	1.24846881438376	beta-thymosin domain repeat CSP29KDa_v1			BGLB003532	1.18671926810061e-16	0.871068908008194	0.72	0.7	2.0086410331871e-12	1	4.04704117017626	Corepressor interacting with RBPJ 1			BGLB003230	3.1910328136778e-07	0.792776169033335	0.553	0.513	0.00540114214043105	2	2.87236310118317	iron zinc purple acid phosphatase			BGLB002040	2.76680649851518e-12	0.722193886332803	0.956	0.974	4.6830966793868e-08	3	13.1269934953497	histone			BGLB014314	2.66059911373169e-06	0.445216337434113	0.915	0.702	0.0450333005990226
BGLB031859	5.60946454787736e-39	0.582788693870681	0.438	0.131	9.49457969373722E-35	0	0.845016383869489	inositol 1,4,5-trisphosphate receptor type 2-like			BGLB013345	1.41537938255976e-16	0.939284038849544	0.69	0.649	2.39567114292065e-12	1	3.89961202065618	acyl- desaturase-like			BGLB004870	3.34864436134832e-07	0.608026152545005	0.6	0.513	0.00566791544601816	2	2.44972766487372	GTPase IMAP family member 7-like			BGLB018588	4.82510407193351e-12	1.25679140055483	0.626	0.453	8.16697115215465e-08	3	4.23013305546794	#N/A			BGLB037623	2.66919921784104e-06	0.350527595020791	0.805	0.505	0.0451788659611774
BGLB022753	6.39442238736495e-39	0.322454315052886	1	0.983	1.08231993328539E-34	0	30.4713249712979	profilin			BGLB038845	1.99153982020604e-16	0.884698273866414	0.744	0.75	3.37088029968074e-12	1	4.93252345393737	probable U3 small nucleolar RNA-associated 11			BGLB003725	3.87117485037852e-07	0.783709360382584	0.653	0.654	0.00655235055175069	2	3.68396111400124	syntenin-1-like			BGLB039465	5.05787217376808e-12	1.33712494221319	0.484	0.255	8.56095444131985e-08	3	2.86752019841053	fos-related antigen 2-like isoform X2
BGLB023918	1.07069913708136e-38	0.508285490851762	0.544	0.204	1.81226535942392E-34	0	1.05402120555327	PREDICTED: uncharacterized protein LOC106058223 isoform X1			BGLB024201	2.34614581976559e-16	0.745597034673476	0.833	0.848	3.97108641453523e-12	1	6.09247852751371	#N/A			BGLB003046	4.14505569179231e-07	0.741524550043202	0.287	0.157	0.00701592126392766	2	1.13178375517987	PREDICTED: uncharacterized protein LOC106056692			BGLB017367	5.9226753552179e-12	1.11476140147532	0.802	0.779	1.00247203062418e-07	3	8.56977256764122	chromobox homolog 6
BGLB004031	1.10492399582117e-38	0.381942338608982	0.684	0.307	1.87019435532692E-34	0	1.70833672188744	sodium potassium-transporting ATPase subunit alpha-like			BGLB023255	8.1410031321034e-16	1.08992995080488	0.518	0.342	1.37794619013982e-11	1	2.52453540134488	#N/A			BGLB017574	5.03977266985178e-07	0.719406827279311	0.307	0.169	0.00853031922099113	2	1.18592659723453	E3 ubiquitin-protein ligase XIAP-like; baculoviral IAP repeat-containing protein 3-like			BGLB025349	6.12445634876931e-12	1.2769289399673	0.78	0.796	1.03662548159269e-07	3	8.55390285633919	microtubule-associated 4-like
BGLB001639	1.19906512884966e-38	0.303277113212582	1	0.991	2.02953763709094E-34	0	42.5676524340458	elongation factor 1-alpha			BGLB018588	8.98891009738813e-16	1.18941785675127	0.589	0.449	1.52146292308392e-11	1	3.80767951392432	#N/A			BGLB007378	5.46081033175307e-07	0.340857017328375	1	1	0.00924296756752525	2	581.388290585485	ferritin			BGLB017670	8.47667908258568e-12	0.969550711243591	0.868	0.914	1.43476270151845e-07	3	14.230518592696	#N/A
BGLB011188	1.61262479440983e-38	0.534270428520968	0.959	0.713	2.72952872701808E-34	0	6.04115828942889	phosphoenolpyruvate carboxykinase [GTP]-like			BGLB004845	9.17814477457089e-16	0.976501514531315	0.738	0.72	1.55349278454387e-11	1	5.67312770386188	galectin 4 transcript variant			BGLB008275	6.3473748636924e-07	1.28986138777427	0.38	0.262	0.0107435666942858	2	2.60113892802964	Tyrosine- phosphatase Lar; tyrosine- phosphatase Lar-like isoform X6			BGLB028330	1.01881689630825e-11	0.854375810580517	0.264	0.076	1.72444947869135e-07	3	1.08669134016281	Solute carrier family 35 member F6
BGLB029472	1.90762057854624e-38	0.879477250309639	0.321	0.049	3.22883859124737E-34	0	1.00308043361605	pannexin 10			BGLB031080	1.11252552425097e-15	0.555702131501612	0.905	0.921	1.8830607023472e-11	1	6.77191574644744	#N/A			BGLB007248	9.4126049278572e-07	1.15397401558131	0.44	0.34	0.0159317751008911	2	2.85251645649485	lens fiber membrane intrinsic -like			BGLB028394	1.26503839744095e-11	0.567492160077673	0.89	0.974	2.14120399150856e-07	3	11.5130151878896	#N/A
BGLB035177	2.54269838813536e-38	1.30503101339926	0.45	0.132	4.30377129175791E-34	0	5.06377170602849	perlucin-like protein			BGLB034998	1.13453822794091e-15	1.08127876469938	0.339	0.148	1.92031940461278e-11	1	1.56883215250351	general transcription factor 3C polypeptide 3-like			BGLB021817	9.71280561029904e-07	0.57311436278396	0.893	0.96	0.0164398947759921	2	11.166715088882	polyubiquitin-B isoform X2			BGLB025165	1.75308994533326e-11	1.22620502465609	0.648	0.516	2.96728004147107e-07	3	4.27363999838619	docking protein 2-like
BGLB018122	1.14192148089768e-37	1.06507801068442	0.435	0.127	1.93281629856742E-33	0	3.47763019493997	endoglucanase A-like			BGLB012023	1.67646349558036e-15	0.773948181975667	0.762	0.782	2.83758211261931e-11	1	4.53940349138289	39S ribosomal mitochondrial-like			BGLB024922	9.77082345609027e-07	0.701467646362349	0.313	0.187	0.0165380957817784	2	1.12844667720029	E3 ubiquitin- ligase TTC3-like			BGLB038607	1.9399357169324e-11	1.09410332927804	0.648	0.468	3.28353519447978e-07	3	4.41657852932422	PREDICTED: uncharacterized protein LOC106070705, partial
BGLB021944	3.83620842043739e-37	0.53184585778014	0.396	0.108	6.49316637243232E-33	0	0.696022464233584	Probable disease resistance protein At1g61190			BGLB023954	2.47340912280585e-15	0.892506324923856	0.333	0.137	4.18649228126119e-11	1	1.37144046272702	#N/A			BGLB018571	1.17692731305905e-06	0.809863765995302	0.48	0.376	0.0199206717008374	2	2.2817942223949	interferon regulatory factor 1-like isoform X2			BGLB039130	2.22459268399623e-11	1.01982862575528	0.396	0.172	3.76534557693202e-07	3	1.74881843484106	B-cell scaffold with ankyrin repeats-like isoform X1
BGLB037478	9.68612230606166e-37	0.561695806063582	0.355	0.077	1.639473061524E-32	0	0.669327048376115	PREDICTED: uncharacterized protein LOC106074385 isoform X1			BGLB032964	3.09656587146614e-15	1.06704750009881	0.423	0.228	5.24124739404359e-11	1	1.92353771943122	Myeloid differentiation primary response 88			BGLB011348	1.32540363880501e-06	1.124717500204	0.933	0.957	0.0224337819904135	2	19.4163673881822	dynein light chain cytoplasmic			BGLB024882	7.04796600319658e-11	0.833453274039341	0.802	0.828	1.19293872570105e-06	3	6.84848319341821	lysosome-associated membrane glyco 1-like
BGLB011213	1.15396716191613e-36	0.438362683941252	0.656	0.284	1.95320481825924E-32	0	2.00675981329696	apolipo D			BGLB028501	3.16485735337055e-15	0.851086264558395	0.72	0.716	5.35683755631499e-11	1	4.4833449535332	histone-lysine N-methyltransferase SETD1B-like isoform X6; B-cell linker protein-like isoform X11; basic salivary proline-rich protein 2-like isoform X9; pollen-specific leucine-rich repeat extensin-like protein 1 isoform X7; YLP motif-containing protein 1-like isoform X2			BGLB008082	1.35396480577048e-06	1.00885379414825	0.593	0.651	0.0229172083024711	2	4.54765625692873	cathepsin Z			BGLB031159	9.18145796167878e-11	1.1792224207372	0.516	0.322	1.55405357459375e-06	3	2.67856484623556	long-chain-fatty-acid-- ligase 5
BGLB023584	2.62203510445266e-36	0.530644964163009	0.852	0.47	4.43805661779656E-32	0	4.27324347201067	collagen alpha-6(VI) chain-like			BGLB002928	3.21472305922864e-15	1.03652925121202	0.512	0.346	5.4412402500504e-11	1	2.34822712505411	breakpoint cluster region -like			BGLB006724	1.48526778848589e-06	0.608910784685032	0.813	0.884	0.0251396425879122	2	6.25292681371438	dynein light chain Tctex-type 1			BGLB026136	1.43958148605665e-10	1.33649996846117	0.396	0.182	2.43663562329948e-06	3	2.5818088408992	dipeptidyl peptidase 2-like
BGLB027343	3.37961511629686e-36	0.492773969324794	0.476	0.169	5.72033654584406E-32	0	0.869015418965493	PREDICTED: uncharacterized protein LOC106050705			BGLB013101	4.06072041206401e-15	0.419363867887164	0.994	0.997	6.87317536945954e-11	1	32.8530499432691	polyadenylate-binding 1			BGLB036942	1.59688821924371e-06	0.729113859406782	0.747	0.838	0.027028929998919	2	7.32073813332028	max dimerization 1-like isoform X1			BGLB021080	1.53962706084747e-10	0.881624750339602	0.275	0.088	2.60597276319042e-06	3	1.31714422671723	PREDICTED: uncharacterized protein LOC106057727
BGLB002117	5.11022496004358e-36	0.935333173674337	0.435	0.139	8.64956676736977E-32	0	1.98707928322237	collagen alpha-6(VI) chain-like			BGLB037911	4.76969451932071e-15	1.06837980455843	0.423	0.235	8.07318494340223e-11	1	1.90403395828765	#N/A			BGLB011963	1.86615347331309e-06	0.564681317391052	0.6	0.56	0.0315865136892974	2	2.22203125692915	enoyl- mitochondrial			BGLB001552	2.06100446130641e-10	1.17956742198555	0.769	0.816	3.48845615120723e-06	3	9.13933091034093	galectin 1
BGLB010255	5.35447520678981e-36	0.303847893249857	1	0.995	9.06298473501243E-32	0	37.7890875408017	60S ribosomal L10a			BGLB003640	5.86682017678283e-15	0.607863992365013	0.369	0.153	9.93017983122262e-11	1	1.48425455050626	phosphonoacetaldehyde hydrolase-like			BGLB001902	2.30903849608518e-06	0.695903938026734	0.387	0.264	0.0390827855847378	2	1.43790097768898	monocarboxylate transporter 12-like			BGLB005695	2.07618845796391e-10	0.683344921395002	0.879	0.945	3.51415658394972e-06	3	10.5497733681886	14-3-3 beta alpha
BGLB006741	6.3665003066877e-36	0.426121918271873	0.632	0.27	1.07759384190996E-31	0	1.30145223428422	Integrin-linked kinase			BGLB010723	6.97362839751386e-15	0.875704434219257	0.69	0.657	1.1803563425632e-10	1	3.70516402900764	methyltransferase 6														BGLB008082	2.40210964650491e-10	1.19872558152954	0.692	0.646	4.06581078767421e-06	3	5.42101965511436	cathepsin Z
BGLB038790	7.74443463222407e-36	1.22431972242874	0.378	0.099	1.31082300585025E-31	0	2.26755514726333	L-gulonolactone oxidase-like			BGLB022573	7.73011211772431e-15	1.06735173130062	0.655	0.633	1.30839877704602e-10	1	4.4713260252438	#N/A														BGLB008175	2.53621719027212e-10	1.16789619668679	0.659	0.604	4.2928012162546e-06	3	4.51193524437963	#N/A
BGLB006382	3.79478923221116e-35	0.567905145338787	0.723	0.368	6.42306025444062E-31	0	2.10242169803802	fermitin family homolog 2-like			BGLB009264	9.67524105106023e-15	0.448715623703151	0.952	0.973	1.63763130030245e-10	1	11.9255342898556	ATP synthase subunit mitochondrial-like														BGLB028495	2.80238427783413e-10	1.43725789817667	0.703	0.655	4.74331562866205e-06	3	17.1019770993009	#N/A
BGLB005476	8.10560327470466e-35	0.351030877570101	0.997	0.944	1.37195441027651E-30	0	14.2964868277081	elongation factor 1-beta			BGLB001803	9.69764605049894e-15	0.716035890383867	0.845	0.884	1.64142357050745e-10	1	6.89245474131492	probable ATP-dependent RNA helicase DDX5 isoform X2														BGLB023379	4.07992516919499e-10	0.967478869864632	0.297	0.109	6.90568134137945e-06	3	1.2991878187147	PREDICTED: uncharacterized protein LOC106062054
BGLB001815	9.6381219622542e-35	0.461443085279705	0.574	0.239	1.63134852333115E-30	0	1.18295822510671	bifunctional 3 -phosphoadenosine 5 -phosphosulfate synthase-like			BGLB006886	1.18306664103393e-14	0.836564257109256	0.732	0.706	2.00245859661402e-10	1	4.12185851985844	eukaryotic translation initiation factor 3 subunit H														BGLB025840	7.43931859412212e-10	0.944561190853631	0.264	0.088	1.25917906524111e-05	3	1.21834224650162	membrane-associated protein Hem-like isoform X3
BGLB027012	1.14085953942589e-34	0.458193536731783	0.568	0.237	1.93101885643226E-30	0	1.18469869066499	rho GTPase-activating 7-like			BGLB033666	1.27493742750032e-14	0.936439507711385	0.613	0.5	2.15795908978704e-10	1	3.08512441119091	serine threonine- kinase RIO3														BGLB029966	1.31850823441549e-09	1.00202832671326	0.264	0.089	2.23170703757166e-05	3	1.44372976078999	basic leucine zipper transcriptional factor ATF-like isoform X2; proto-oncogene c-Fos-like
BGLB037360	1.1825967706243e-34	0.484021065084611	0.669	0.307	2.0016632939587E-30	0	1.60151172065386	Chloride intracellular channel protein 4			BGLB012981	1.49767040466903e-14	0.728101331859856	0.762	0.748	2.53495692694279e-10	1	5.01268826733083	PREDICTED: rhodopsin-like														BGLB030356	1.40755559981289e-09	1.74389988259259	0.286	0.098	2.38242860824331e-05	3	6.97738473816861	#N/A
BGLB002237	2.10802366478476e-34	0.499465937105468	0.856	0.476	3.56804085501469E-30	0	2.98264755302514	triosephosphate isomerase			BGLB024265	1.66836941296154e-14	0.466575877646977	0.887	0.908	2.8238820683787e-10	1	8.73951504656656	#N/A														BGLB003725	1.48671023814023e-09	1.06570978450521	0.67	0.654	2.51640574907616e-05	3	4.71687420566791	syntenin-1-like
BGLB009166	2.48475742451086e-34	0.516335720953656	0.641	0.298	4.20570041672708E-30	0	1.54925085069316	hexokinase-2-like isoform X5			BGLB026777	2.15972177873525e-14	1.13004542964524	0.488	0.332	3.65554508268729e-10	1	2.3886718171141	arginine--tRNA cytoplasmic-like														BGLB034046	1.77386148322570e-09	1.07211885485381	0.593	0.464	3.00243794650781e-05	3	3.24200719184132	fucose mutarotase-like
BGLB034132	3.39090206606524e-34	0.468578237608869	0.361	0.094	5.73944083702203E-30	0	0.597519790279396	alkaline tissue-nonspecific isozyme-like			BGLB009842	3.69147115441763e-14	1.15351144804336	0.554	0.444	6.24818407596729e-10	1	3.02175853686229	zinc metallo ase nas-13-like														BGLB002822	2.8106616147555e-09	0.979670344539923	0.319	0.134	4.75732584913516e-05	3	1.41065730113418	long-chain-fatty-acid-- ligase 4-like
BGLB010691	3.916079658064e-34	0.53297994424581	0.531	0.207	6.62835642923913E-30	0	1.20026637380924	phosphatase 1 regulatory subunit 3B-like			BGLB001585	4.24665590318526e-14	1.08043820276778	0.631	0.607	7.18788978173138e-10	1	3.96712836989634	signal recognition particle 54 kDa														BGLB029994	3.87686562830694e-09	0.386193519881074	0.407	0.193	6.56198276247232e-05	3	4.1404225192527	PREDICTED: uncharacterized protein LOC106074468
BGLB008677	4.15069132122668e-34	0.517830411280872	0.774	0.404	7.02546013030828E-30	0	2.15673037946612	pyruvate kinase PKM-like isoform X3; pyruvate kinase PKM-like isoform X2			BGLB027408	5.08702409157733e-14	0.966419004814627	0.321	0.141	8.61029697740379e-10	1	1.40243790591508	Jumonji-like isoform X1														BGLB009463	4.46710799615433e-09	0.718437917591975	0.264	0.092	7.56102699429082e-05	3	1.50340577775024	histone H1-delta-like
BGLB023544	9.22939589318458e-34	0.485920032549755	0.566	0.253	1.56216754888042E-29	0	1.21095226672068	vinculin-like isoform X7			BGLB017032	8.37574067847966e-14	1.01469637890693	0.619	0.571	1.41767786723947e-09	1	3.48913270968437	probable ATP-dependent RNA helicase DDX56														BGLB021651	5.0934798083496e-09	0.924995254356624	0.253	0.088	8.62122392361253e-05	3	1.16006284258574	canopy 4-like
BGLB021836	9.65869572915042e-34	0.553887158640587	0.405	0.125	1.634830839116E-29	0	0.796477729802272	tRNA-dihydrouridine(47) synthase [NAD(P)(+)]			BGLB037201	9.85233239820634e-14	0.927197233975841	0.417	0.232	1.66760578172041e-09	1	1.74341539790143	#N/A														BGLB002299	7.42643278558693e-09	0.905477804437561	0.33	0.144	0.000125699801328844	3	1.35536385663655	alpha-N-acetylgalactosaminidase-like
BGLB005531	1.3519719685068e-33	0.470272444225117	0.294	0.047	2.28834775389461E-29	0	0.484464757826254	kazrin-like isoform X4 ; X3 ; X2			BGLB006384	1.02823085394123e-13	0.795482299458117	0.732	0.762	1.74038354338093e-09	1	4.93689556088403	FAM50 homolog														BGLB012921	8.1064409519955e-09	0.966312589751557	0.56	0.416	0.000137209619553476	3	3.16413645287559	Cytosolic non-specific dipeptidase
BGLB037367	3.06079670344439e-33	0.40691878195053	0.568	0.239	5.18070450024997E-29	0	1.53832646200793	plasma kallikrein-like isoform X1			BGLB039205	3.14354002658118e-13	0.906876891348706	0.631	0.596	5.32075584899131e-09	1	3.3967198874851	39S ribosomal mitochondrial-like														BGLB007378	8.45227017749003e-09	0.321336687989831	1	1	0.000143063125024196	3	578.040479105819	ferritin
BGLB029202	3.40992449806617e-33	0.453779247559209	0.469	0.162	5.7716382054268E-29	0	0.837824658266175	PREDICTED: uncharacterized protein LOC106057632			BGLB038760	3.28321456688073e-13	1.04549857393696	0.399	0.226	5.55716897590232e-09	1	1.81023195820564	latrophilin-2-like														BGLB035805	9.79725704945013e-09	0.935446972594112	0.769	0.754	0.000165828372818993	3	7.00671153831804	D-amino-acid oxidase
BGLB000223	6.41754518380154e-33	0.515650007775252	0.501	0.197	1.08623369781025E-28	0	1.42491729076173	antimicrobial peptide hydramacin			BGLB013372	3.50795211199147e-13	0.921138165354431	0.589	0.506	5.93755974475677e-09	1	3.01684634284852	ETS homologous factor-like isoform X1														BGLB032640	9.82641993289033e-09	1.19223857785023	0.604	0.525	0.000166321983784102	3	3.84488527337557	myeloid leukemia factor 2-like; Myeloid leukemia factor
BGLB011060	7.73867830534273e-33	0.253755825666928	1	0.991	1.30984868996231E-28	0	39.5957825400223	60S ribosomal L7a			BGLB017236	4.31106644393784e-13	1.07064680178376	0.435	0.273	7.29691106300919e-09	1	2.02543635762877	galactocerebrosidase-like isoform X1														BGLB035106	9.94258748697007e-09	1.02419614774021	0.275	0.104	0.000168288235804455	3	1.4297084135811	histone acetyltransferase KAT6B-like
BGLB003102	7.86341161225154e-33	0.482304013495293	0.819	0.467	1.3309610494897E-28	0	3.22847052509463	zinc finger Xfin-like			BGLB004108	5.24155077146549e-13	1.01077836078517	0.595	0.501	8.87184883578249e-09	1	3.34782669057828	transcriptional regulator ERG homolog														BGLB012965	1.02550564469144e-08	0.797624817798094	0.264	0.095	0.000173577085420474	3	1.10029037085666	heterogeneous nuclear ribonucleo U 1
BGLB034639	1.08772722493203e-32	0.461940446826963	0.355	0.091	1.84108710091995E-28	0	0.61983662289944	PREDICTED: uncharacterized protein LOC106067167			BGLB032767	6.55034168673323e-13	0.86068943774903	0.298	0.127	1.10871083389647e-08	1	1.20168260848349	#N/A														BGLB018111	1.68376249067579e-08	1.50919902020294	0.462	0.304	0.000284993639171784	3	3.41432817092534	unconventional myosin-X-like
BGLB030297	1.45822323112737e-32	0.571815919787645	0.719	0.366	2.46818864100619E-28	0	2.4553835539897	phosphofurin acidic cluster sorting 1			BGLB035070	6.84821407271091e-13	0.902521303256401	0.387	0.212	1.15912871394705e-08	1	1.49015996903886	copine-8 isoform X1														BGLB029297	1.85519045841265e-08	1.66074297403477	0.615	0.602	0.000314009536990925	3	6.84103584083114	short-chain dehydrogenase reductase family 16C member 6-like
BGLB034498	1.46722198051112e-32	0.469452104675569	0.348	0.091	2.48341992421311E-28	0	0.588348609727575	neuromedin-U receptor 2-like			BGLB032102	9.12837438380848e-13	0.584889510577778	0.821	0.914	1.54506864820342e-08	1	6.20205149080778	proteasome maturation														BGLB028389	1.86953162710182e-08	0.672223232174255	0.956	0.986	0.000316436923203255	3	27.0911483406818	#N/A
BGLB001627	1.6593216553974e-32	0.310192124605543	1	0.976	2.80856783392564E-28	0	21.4358238447979	40S ribosomal S8			BGLB014380	1.05610830913361e-12	0.58303831679934	0.869	0.908	1.78756892403955e-08	1	6.63601359720913	proteasome subunit alpha type-4														BGLB012981	1.90070107004037e-08	1.00537056636178	0.714	0.75	0.000321712663115032	3	6.34611217426511	PREDICTED: rhodopsin-like
BGLB001636	1.75929894252767e-32	0.461259014086064	0.978	0.746	2.97778939012234E-28	0	6.52993802588312	adenylyl cyclase-associated 1 isoform X2			BGLB019870	1.38048289157126e-12	0.667781415744641	0.75	0.769	2.33660534227351e-08	1	4.19090233003693	probable 28S ribosomal mitochondrial														BGLB010302	2.02663838946582e-08	1.25299331183009	0.714	0.79	0.000343028813800985	3	8.76514498868026	mucin-17-like isoform X4; mucin-17-like isoform X5; mucin-17-like isoform X7; mucin-17-like isoform X1; mucin-17-like isoform X2; mucin-17-like isoform X3; mucin-17-like isoform X6
BGLB036922	4.53085654183115e-32	0.538240201605454	0.367	0.105	7.66892778270341E-28	0	0.708856224095751	thyrotropin-releasing hormone receptor-like			BGLB005101	1.69060710606526e-12	0.485213552556981	0.905	0.931	2.86152158772605e-08	1	7.60876939017905	ATP synthase subunit mitochondrial-like														BGLB035681	2.25729715109842e-08	1.19235488235013	0.593	0.545	0.000382070115794918	3	3.89696890921109	#N/A
BGLB011062	4.94200775379001e-32	0.443881340025804	0.471	0.174	8.36484232406498E-28	0	0.87824422347137	neurogenic locus Notch -like			BGLB012009	1.81767574660584e-12	0.44710800692728	0.946	0.971	3.07659796870505e-08	1	10.6055773574459	gamma-aminobutyric acid receptor-associated														BGLB001587	2.33476401885585e-08	1.15269655590995	0.451	0.29	0.00039518215783154	3	2.26421281559674	#N/A
BGLB025031	7.02308261861189e-32	0.828375955406587	0.351	0.094	1.18872696402625E-27	0	1.27435071800927	methyltransferase DDB_G0268948			BGLB029892	2.46797272818662e-12	0.736749462107161	0.274	0.114	4.17729063972868e-08	1	0.95098935237709	cyclic AMP-dependent transcription factor ATF-6 alpha-like														BGLB028111	2.75221849578298e-08	1.17197318040557	0.549	0.436	0.000465840502596228	3	3.27295218398034	tyrosine phosphatse
BGLB014142	9.04038982909161e-32	0.494602717482336	0.439	0.16	1.53017638247205E-27	0	0.827929922472575	tetraspanin-18-like isoform X1			BGLB022986	3.01700280135739e-12	0.867941860526699	0.679	0.726	5.10657894157752e-08	1	4.30335363103659	alpha- and gamma-adaptin-binding p34														BGLB001042	2.77384872119406e-08	0.833165782938635	0.341	0.158	0.000469501634549306	3	1.33493159460816	alpha-galactosidase A-like isoform X1; alpha-N-acetylgalactosaminidase-like isoform X2
BGLB026746	9.5542542369343e-32	0.495489517233571	0.615	0.274	1.6171530721435E-27	0	1.4753314541129	#N/A			BGLB001229	3.3311489303962e-12	0.853126684409261	0.649	0.638	5.6383026795886e-08	1	3.43981060718877	39S ribosomal mitochondrial														BGLB025316	2.82350952742677e-08	0.645672808360995	0.912	0.962	0.000477907222612256	3	11.1637971392075	up-regulated during skeletal muscle growth 5
BGLB038438	1.0119582711355e-31	0.445431119576107	0.554	0.232	1.71284056972394E-27	0	1.1652750584127	PTB domain-containing engulfment adapter protein 1-like isoform X1			BGLB008608	3.71688208278794e-12	0.948854541759831	0.506	0.393	6.29119461332687e-08	1	2.28803659162343	glycogenin-1-like isoform X1														BGLB035557	3.04492528589873e-08	0.941052044480506	0.297	0.121	0.000515384053891219	3	1.62654246419428	#N/A
BGLB037646	1.32810643500937e-31	0.443327421166319	0.728	0.375	2.24795295189685E-27	0	2.20699870042877	#N/A			BGLB024142	4.05580224688473e-12	0.747613613994295	0.738	0.783	6.86485088307709e-08	1	4.72288367156274	39S ribosomal mitochondrial														BGLB034038	3.11003991937111e-08	0.780401697437568	0.659	0.541	0.000526405356752755	3	3.82488454259626	#N/A
BGLB017162	1.62351258306198e-31	0.402596416856929	0.628	0.286	2.7479573980907E-27	0	1.34673576208009	acid sphingomyelinase-like phosphodiesterase 3b			BGLB017620	8.35302566050206e-12	0.891862534801747	0.625	0.58	1.41383312329658e-07	1	3.53827304024778	proto-oncogene tyrosine- kinase Src isoform X2														BGLB000047	6.71349620856614e-08	0.354211721390961	0.802	0.687	0.0011363263682619	3	28.8309478772044	antimicrobial peptide hydramacin
BGLB039532	1.9065801733111e-31	0.702453505337962	0.676	0.368	3.22707760134637E-27	0	3.48919781980228	PREDICTED: uncharacterized protein LOC106075893			BGLB038011	2.43919094874969e-11	1.05855473143494	0.381	0.212	4.12857459985373e-07	1	2.12288617256643	#N/A														BGLB006333	7.84232728660792e-08	1.05327539113088	0.275	0.114	0.00132739231653126	3	1.49059574988094	homeodomain transcription factor
BGLB011409	2.29785041757109e-31	0.450668311741718	0.981	0.753	3.88934161678083E-27	0	6.4364819018649	rho GDP-dissociation inhibitor 1-like			BGLB026368	3.04142270397511e-11	0.904896472727715	0.637	0.586	5.14791206874827e-07	1	3.72768679365562	Rho guanine nucleotide exchange factor														BGLB000163	9.20667909300038e-08	0.757575735485226	0.747	0.827	0.00155832250328124	3	6.05133021744394	probable glutathione S-transferase 7
BGLB013113	2.36556231899973e-31	0.432320121699154	0.463	0.172	4.00395078113894E-27	0	0.851789311563222	poly(U)-specific endoribonuclease isoform X3			BGLB009311	3.14089778410256e-11	0.73989063908661	0.649	0.691	5.31628358937199e-07	1	3.29323662445512	mago nashi homolog														BGLB017387	1.04306243349104e-07	1.25551757026118	0.516	0.396	0.00176548747492693	3	3.37414722810088	peroxisome assembly 26
BGLB032470	3.36866066210114e-31	0.362769188930407	0.993	0.902	5.70179503667239E-27	0	11.0907827330926	GTP-binding nuclear Ran			BGLB028807	4.01575099508224e-11	0.60253363575241	0.756	0.865	6.7970601342762e-07	1	5.48719318734863	MICOS complex subunit Mic27-like														BGLB035013	1.10187040350235e-07	1.1839230327723	0.451	0.28	0.00186502584496807	3	3.01199326840232	PREDICTED: uncharacterized protein LOC106078208
BGLB017377	4.1778895362608e-31	0.500711732815058	0.77	0.399	7.07149582907503E-27	0	2.54166747723832	glycogen brain form-like			BGLB027373	4.1880751777016e-11	0.78926710424582	0.738	0.758	7.08873604577773e-07	1	4.87572290522428	SOSS complex subunit C-like														BGLB006724	1.17862404422439e-07	0.598159767792337	0.813	0.882	0.0019949390572542	3	6.30197154641154	dynein light chain Tctex-type 1
BGLB003228	7.57646491577824e-31	0.375463826198037	0.993	0.834	1.28239245164463E-26	0	9.27164170121714	malate cytoplasmic			BGLB034878	4.38437796797456e-11	0.855830308786836	0.321	0.161	7.42099814859375e-07	1	1.33455106771034	#N/A														BGLB033440	1.7043594328588e-07	0.7839183213242	0.692	0.701	0.00288479877605681	3	6.13490308394243	adhesion G protein-coupled receptor L2-like isoform X1
BGLB012533	8.05999126193149e-31	0.473240686838081	0.639	0.319	1.36423412099452E-26	0	1.69023365789576	glucose-6-phosphate 1-dehydrogenase-like			BGLB021313	4.53265092070395e-11	0.751802665891583	0.613	0.566	7.67196494838351e-07	1	2.96699350003128	rho GTPase-activating 17-like isoform X2														BGLB002111	2.17619833098895e-07	0.731987585447694	0.791	0.88	0.00368343329503189	3	6.93440295621266	small nuclear ribonucleo Sm D3
BGLB002743	9.7052797682607e-31	0.291934094964986	0.999	0.974	1.64271565357581E-26	0	21.7908920558094	guanine nucleotide-binding subunit beta-2-like 1			BGLB031784	4.56317521181956e-11	0.440449498618083	0.946	0.961	7.72363036352578e-07	1	9.41351682260184	ATP synthase subunit mitochondrial-like														BGLB032910	2.8884223251337e-07	0.695633328236502	0.758	0.846	0.0048889436275213	3	5.35288376140038	enhancer of rudimentary homolog
BGLB034523	1.0776723921932e-30	0.40196464842804	0.577	0.249	1.82406829102622E-26	0	1.20465122449469	CDC42 small effector protein 2-B			BGLB033398	5.4609120951567e-11	0.785816231461578	0.714	0.724	9.24313981226223e-07	1	4.44696923778848	PREDICTED: uncharacterized protein LOC106056343														BGLB028519	3.14658872866342e-07	0.574458806583176	0.846	0.939	0.00532591608213571	3	8.67631487236055	#N/A
BGLB030521	1.54136254728171e-30	0.42342401769298	0.413	0.146	2.60891024752902E-26	0	0.731345675240732	cartilage matrix -like			BGLB024272	5.58811307965740e-11	0.662415277445036	0.768	0.807	9.45844019862812e-07	1	4.85922685997885	cytochrome c oxidase subunit 7A-related mitochondrial														BGLB024646	3.30466741949981e-07	1.15940484326731	0.604	0.557	0.00559348007424537	3	4.44804146224257	carbonic anhydrase 2
BGLB025675	2.04011998626022e-30	0.433117696560728	0.884	0.554	3.45310708874405E-26	0	3.75752801579922	dihydrofolate reductase-like			BGLB010302	5.72089930426789e-11	0.72970717618997	0.762	0.789	9.68319416240383e-07	1	5.83954219915017	mucin-17-like isoform X4; mucin-17-like isoform X5; mucin-17-like isoform X7; mucin-17-like isoform X1; mucin-17-like isoform X2; mucin-17-like isoform X3; mucin-17-like isoform X6														BGLB032944	4.75662724984827e-07	0.631072917875511	0.802	0.873	0.00805106728309318	3	7.87895496301487	ependymin-related 1-like
BGLB022386	3.02874365439154e-30	0.432146234295802	0.574	0.265	5.12645150942312E-26	0	1.24755153089275	CD284			BGLB017233	6.33199856861589e-11	1.07845750092484	0.417	0.271	1.07175407772392e-06	1	2.10363553017703	Calcium calmodulin-dependent kinase type II alpha chain														BGLB005410	4.8157612393543e-07	0.969745163428768	0.549	0.427	0.00815115747373109	3	3.53087838975299	prediced GPI-anchored 23-like
BGLB039615	4.08149762264634e-30	0.458416246575974	0.358	0.103	6.90834287609119E-26	0	0.596783728550248	glyoxylate reductase hydroxypyruvate reductase-like			BGLB040410	6.69096435591547e-11	0.874376379058736	0.583	0.554	1.13251262688225e-06	1	2.94621192793252	ATPase ASNA1 homolog														BGLB026971	6.21723169679943e-07	0.909692633337311	0.297	0.144	0.0105232863700027	3	1.29392135467239	transforming acidic coiled-coil-containing 1-like
BGLB038968	5.27272251702059e-30	0.442709312491346	0.759	0.397	8.92461013230905E-26	0	2.32947878957138	probable prolyl 4-hydroxylase 10			BGLB010600	7.50615293226253e-11	0.690649667191985	0.75	0.803	1.27049144531476e-06	1	4.65468100225888	#N/A														BGLB037047	6.31389823585029e-07	1.04381429916829	0.363	0.206	0.0106869041540002	3	1.86381857905732	Fanconi anemia group M
BGLB000867	8.0847265851519e-30	0.263387361845033	1	0.99	1.36842082180281E-25	0	33.1032502710353	60S ribosomal L18a			BGLB018334	1.68799891537601e-10	0.858448069872776	0.298	0.143	2.85710696416543e-06	1	1.32181413238612	serine threonine- phosphatase 6 regulatory ankyrin repeat subunit B-like														BGLB021313	7.59350818695653e-07	0.92471848129276	0.604	0.569	0.0128527719572426	3	3.53729758445486	rho GTPase-activating 17-like isoform X2
BGLB039766	1.3414914411323e-29	0.757403273609442	0.321	0.08	2.27060841326053E-25	0	1.00588328543018	PREDICTED: uncharacterized protein LOC106050644			BGLB002821	2.07121686993195e-10	0.571767383243149	0.78	0.852	3.50574167404682e-06	1	5.32419711303156	NADH dehydrogenase [ubiquinone] 1 alpha subcomplex subunit 5-like														BGLB020541	8.49704282813972e-07	0.361744962061183	1	0.993	0.0143820946909093	3	21.6439190825307	#N/A
BGLB018979	1.47892279486665e-29	0.458876313777511	0.611	0.293	2.50322472259129E-25	0	1.53748268296605	unconventional myosin-Id-like			BGLB012106	4.43237522727179e-10	0.741773172494834	0.643	0.648	7.50223830968024e-06	1	3.49243660860655	RNA polymerase II-associated 3-like														BGLB004087	1.19990797322446e-06	1.08807516691811	0.44	0.3	0.0203096423547971	3	2.38607302262187	acid ceramidase-like
BGLB029616	1.87462781536862e-29	0.446359742464662	0.295	0.064	3.17299504029293E-25	0	0.508494122694133	PREDICTED: uncharacterized protein LOC106061284			BGLB026115	4.98283302210639e-10	0.79849565197059	0.619	0.616	8.43394317321728e-06	1	3.60434270521403	#N/A														BGLB035101	1.90831722654138e-06	1.09489673921793	0.538	0.457	0.0323001773764395	3	3.65574701109354	#N/A
BGLB002206	2.53634521591795e-29	0.293119148303723	0.993	0.85	4.29301791246272E-25	0	10.4339897524176	Y-box factor homolog			BGLB034014	5.25474789934618e-10	0.580954907529663	0.768	0.872	8.89418629443335e-06	1	5.28176376337644	NADH dehydrogenase (ubiquinone) B17 isoform A
BGLB010094	3.02224875820818e-29	0.347915786729448	0.546	0.23	5.11545824814317E-25	0	1.13878405016341	pyroglutamyl-peptidase 1-like			BGLB036445	7.32675237949923e-10	0.696125068872461	0.667	0.695	1.24012610775404e-05	1	3.63285428430145	Signal recognition particle 9 kDa
BGLB036714	3.98746340385756e-29	0.385303860963	0.673	0.331	6.7491805573693E-25	0	1.73351547284525	SH3 and PX domain-containing 2B isoform X3; SH3 and PX domain-containing 2B isoform X4			BGLB007744	7.69670829894456e-10	0.556138250226549	0.881	0.903	1.30274484667936e-05	1	7.09143234022267	heterogeneous nuclear ribonucleo R-like isoform X2
BGLB025342	4.8230345481508e-29	0.550665860672538	0.468	0.188	8.16346827620005E-25	0	1.30891710244017	#N/A			BGLB025096	1.31776960500392e-09	0.70744821869266	0.685	0.731	2.23045683342964e-05	1	4.08906882475941	muscarinic acetylcholine receptor gar-3-like
BGLB025152	9.74863539089731e-29	0.455388670114798	0.403	0.145	1.65005402626328E-24	0	0.723030242868851	Cytochrome P450 72A63			BGLB007789	1.56675279697592e-09	0.91587251325818	0.512	0.449	2.65188578416144e-05	1	2.48223933544678	#N/A
BGLB038427	1.69293544286959e-28	0.42482392408231	0.458	0.176	2.86546253060107E-24	0	0.833194515994757	ferric-chelate reductase 1			BGLB036141	1.85917083198611e-09	0.789331606350118	0.256	0.119	3.1468325502197e-05	1	1.06015211992178	#N/A
BGLB009025	1.73824416817514e-28	0.414520802696525	0.799	0.439	2.94215207905324E-24	0	2.07679531008998	transaldolase			BGLB000751	2.0375804309861e-09	0.724426939893901	0.625	0.608	3.44880863748708e-05	1	3.39766254716797	dual specificity phosphatase 7-like
BGLB039963	1.84515876397532e-28	0.47698462442001	0.842	0.512	3.12311572390462E-24	0	2.85086820069107	translocon-associated subunit delta-like			BGLB035988	2.405334795294e-09	0.797507660864746	0.56	0.527	4.07126967451463e-05	1	2.61928729600656	translation initiation factor eIF-2B subunit gamma
BGLB023364	3.20990483572626e-28	0.371370600652908	0.479	0.193	5.43308492495027E-24	0	1.10300977989588	PREDICTED: uncharacterized protein LOC106067978			BGLB019462	2.6711626826061e-09	0.725405787750351	0.679	0.727	4.52120995657908e-05	1	3.81375096254259	queuine tRNA-ribosyltransferase subunit QTRTD1 isoform X1
BGLB009473	4.26991771150621e-28	0.411473126114767	0.604	0.286	7.22726271849541E-24	0	1.33999079108606	PREDICTED: uncharacterized protein LOC106071652			BGLB000072	4.26467260953719e-09	0.504392545427765	0.762	0.812	7.21838485890265e-05	1	4.08229496999535	manganese superoxide dismutase
BGLB016621	7.18638494951793e-28	0.371032197497766	0.481	0.192	1.21636751655541E-23	0	0.900852967789777	PREDICTED: uncharacterized protein LOC106051884			BGLB004817	5.29019263700024e-09	0.572963331708131	0.798	0.86	8.9541800573866e-05	1	5.52673339952879	28S ribosomal mitochondrial-like
BGLB004497	1.11559183116151e-27	0.296547731307987	0.997	0.943	1.88825073342397E-23	0	16.0432135421869	elongation factor 1-gamma-like			BGLB028465	5.62195809430484e-09	0.707862337423771	0.661	0.717	9.51572627042036e-05	1	3.73972376044525	thioredoxin domain-containing plp1-like
BGLB022779	1.17834933107541e-27	0.390009648154068	0.792	0.434	1.99447407777824E-23	0	2.41405936425534	PREDICTED: uncharacterized protein LOC106068957 isoform X1			BGLB004087	5.82562032105321e-09	0.899020515574278	0.417	0.297	9.86044495541466e-05	1	1.9157930071563	acid ceramidase-like
BGLB029913	1.332237252846e-27	0.476109112712933	0.682	0.347	2.25494477416714E-23	0	2.04416886038096	putative uncharacterized transposon-derived protein F52C9.6			BGLB021896	6.03329124521757e-09	0.700621994138595	0.673	0.721	0.000102119487616553	1	3.79424665694416	eukaryotic translation initiation factor 3 subunit G
BGLB010603	1.40510449875531e-27	0.302256095487765	0.999	0.972	2.37827987459324E-23	0	21.1609869541301	60S acidic ribosomal P0-like			BGLB025560	6.08490012419108e-09	0.677197644984652	0.702	0.739	0.000102993019502058	1	4.48502455316853	#N/A
BGLB024902	1.95897856106637e-27	0.252684393202284	0.945	0.528	3.31576711246093E-23	0	5.76418844674023	death domain-containing protein CRADD-like			BGLB008175	6.85805052604491e-09	0.790514442499717	0.601	0.606	0.000116079363203836	1	3.22654914003452	#N/A
BGLB022462	2.33454569446348e-27	0.390200778704571	0.261	0.051	3.95145204244889E-23	0	0.389790455585944	PREDICTED: uncharacterized protein LOC106051070			BGLB007197	1.11483813537056e-08	0.651695025018976	0.696	0.758	0.000188697502792821	1	3.94486586699252	Proteasome subunit alpha type-2
BGLB036077	2.70887976783558e-27	0.526786940355255	0.267	0.054	4.58504989503851E-23	0	0.562771051099082	beta-1,3-glucan-binding -like			BGLB028094	1.2344193619232e-08	0.517864626964891	0.881	0.907	0.00020893782119912	1	8.41883955704875	#N/A
BGLB010812	4.25323401365389e-27	0.414339057344912	0.441	0.176	7.19902389151057E-23	0	0.778906149110244	cytosolic phospholipase A2-like isoform X5			BGLB009190	1.33655433352666e-08	0.347197108918305	0.964	0.976	0.000226225186492723	1	11.6402685575229	SET
BGLB024238	7.99697309571482e-27	0.381022320487756	0.779	0.429	1.35356766618069E-22	0	2.21808959347302	tropomodulin isoform X4			BGLB027368	1.48986702842895e-08	0.55845449803188	0.768	0.824	0.000252174893231885	1	4.99390217922544	PREDICTED: uncharacterized protein LOC106070102 isoform X1
BGLB026708	1.00895880488407e-26	0.391915831698696	0.357	0.118	1.70776367314677E-22	0	0.573554385615028	PREDICTED: uncharacterized protein LOC106056436 isoform X1			BGLB028519	1.65815460224219e-08	0.295206578079056	0.881	0.939	0.000280659247975513	1	6.99619938526417	#N/A
BGLB016763	1.31606520120296e-26	0.338570259907021	0.644	0.321	2.22757195955612E-22	0	1.44898747323465	plasma membrane calcium-transporting ATPase 2 isoform X1			BGLB002036	1.76998582434015e-08	0.446833977571553	0.875	0.947	0.000299587800627814	1	8.1476915912841	Sex muscle abnormal 5
BGLB009072	2.00149300083151e-26	0.97782389104713	0.479	0.214	3.38772705320742E-22	0	2.2238270798005	cytochrome P450 2U1-like			BGLB038603	1.95574832987257e-08	0.717966804622422	0.643	0.72	0.000331029962314231	1	3.85915633721023	#N/A
BGLB028384	2.70204153202945e-26	0.412436201694432	0.338	0.108	4.57347549711305E-22	0	0.562615942595657	Coiled-coil domain-containing protein 94 homolog {ECO:0000305}			BGLB000510	2.40900467338677e-08	0.451914915522931	0.827	0.901	0.000407748131017444	1	5.74783874824718	ubiquitin-conjugating enzyme E2 2-like
BGLB008154	3.05912426010441e-26	0.400037473523169	0.789	0.437	5.17787372265273E-22	0	2.04540251097689	#N/A			BGLB001868	2.79626384046376e-08	0.516101234697098	0.738	0.84	0.000473295617636896	1	4.4477034907603	26S proteasome non-ATPase regulatory subunit 12
BGLB028854	3.4855388838127e-26	0.484274605861419	0.442	0.179	5.89962311474138E-22	0	1.03291130872485	PREDICTED: uncharacterized protein LOC106066439			BGLB039323	2.99523893314796e-08	0.732811279640708	0.256	0.13	0.000506974141824623	1	0.990963556075655	voltage-gated hydrogen channel 1
BGLB016844	4.16020678844887e-26	0.336604520625154	0.422	0.157	7.04156601012855E-22	0	0.792404204595461	T-box transcription factor TBX3-like			BGLB017387	3.23071111681714e-08	0.728411216547199	0.482	0.395	0.000546830163632469	1	2.05639882631184	peroxisome assembly 26
BGLB012011	4.23883863370853e-26	0.507999426556287	0.347	0.108	7.17465827141505E-22	0	0.813937155198361	transcription factor HES-1			BGLB005746	3.70430538475964e-08	0.685010210986534	0.637	0.696	0.000626990729424417	1	3.24107439774358	casein kinase II subunit beta isoform X1
BGLB000032	6.99726650033183e-26	0.505223345205729	0.4	0.148	1.18435732784617E-21	0	1.02378406900956	glutathione S-transferase omega-1-like			BGLB008145	3.92925810596797e-08	0.523066431498332	0.774	0.871	0.000665066227016138	1	5.74811662916396	pre-rRNA processing FTSJ3-like
BGLB005140	8.37677264009724e-26	0.275514231715963	1	0.972	1.41785253706286E-21	0	27.4612874441901	ribosomal L26 isoform 1			BGLB037148	4.60125293293474e-08	0.645245355721693	0.708	0.788	0.000778808071428534	1	4.62035918610718	#N/A
BGLB040100	8.43639257794028e-26	1.02655820299846	0.374	0.131	1.42794380774217E-21	0	2.43058007900494	arginase-1; arginase- mitochondrial			BGLB010910	4.77357367459842e-08	0.65538802980654	0.613	0.648	0.000807975080162529	1	2.93264798352351	small integral membrane 8
BGLB025761	1.16761816738493e-25	0.371703376667639	0.674	0.338	1.97631051011572E-21	0	1.58565623882554	lifeguard 3-like isoform X2			BGLB004825	6.94402942292638e-08	0.43254553189344	0.696	0.777	0.00117534642012452	1	3.14757091770608	RNA-binding 8A
BGLB001641	4.51080957060316e-25	0.289465966204985	0.997	0.941	7.63499627920291E-21	0	19.693486943735	60S ribosomal L35a-like			BGLB024560	7.30217969190046e-08	0.785465445823994	0.494	0.441	0.00123596693465107	1	2.17661080259861	lectin BRA-3-like
BGLB016978	5.10255895137598e-25	0.387310173962305	0.724	0.399	8.63659128109899E-21	0	2.09523320318056	cyclin-I-like			BGLB032630	1.00284072498774e-07	0.854404637115892	0.381	0.276	0.00169740821111425	1	1.62612684098297	lens fiber membrane intrinsic -like
BGLB005942	1.00438570091446e-24	0.349279670787437	0.358	0.127	1.70002323736781E-20	0	0.607337041554513	3-oxo-5-alpha-steroid 4-dehydrogenase 1			BGLB030592	1.21564631311015e-07	0.605174472034148	0.702	0.768	0.00205760294957024	1	4.22838150212996	p21-activated kinase-interacting 1
BGLB028174	1.62384804406413e-24	0.39005008008621	0.469	0.199	2.74852519938294E-20	0	1.01833753253568	PREDICTED: uncharacterized protein LOC106065961			BGLB011194	1.46511640654057e-07	0.686173726876886	0.518	0.485	0.00247985602971057	1	2.11617010088668	NTF2-related export
BGLB012929	2.16982760764218e-24	0.40444726080977	0.937	0.636	3.67265020869515E-20	0	8.0506660677923	cytochrome c oxidase subunit III (mitochondrion)			BGLB011414	1.53942922462985e-07	0.653738487164269	0.679	0.74	0.00260563790560849	1	4.28036434191059	heterogeneous nuclear ribonucleo A1-like isoform X1
BGLB014021	2.18710571003527e-24	0.262809412161356	1	0.974	3.7018951248057E-20	0	23.8054123967007	60S ribosomal L15			BGLB010469	2.08331480176523e-07	0.359441201836493	0.94	0.97	0.00352621863346783	1	14.9305578275807	neutral and basic amino acid transport rBAT-like
BGLB005262	2.61540987970303e-24	0.360244631774269	0.952	0.721	4.42684276238534E-20	0	4.87025772442561	staphylococcal nuclease domain-containing 1-like			BGLB029322	2.25880107880885e-07	0.657322782868737	0.518	0.488	0.00382324670599185	1	2.0812065346988	RNA-binding NOB1
BGLB025218	3.22533458931629e-24	0.38072080643751	0.324	0.108	5.45920132587675E-20	0	0.520228420449486	ferric-chelate reductase 1 isoform X1			BGLB006838	3.39963254078588e-07	0.697321259126933	0.613	0.675	0.00575421803853419	1	3.35931499219413	omega-3 fatty acid endoplasmic reticulum-like
BGLB033569	3.33932186613546e-24	0.342112686898242	0.293	0.084	5.65213619062087E-20	0	0.428631845920801	ferric-chelate reductase 1			BGLB032802	3.41091050988133e-07	0.809580441246376	0.5	0.471	0.00577330712902513	1	2.30405139233474	vesicle transport SFT2A
BGLB006864	3.51546095130516e-24	0.374736221816096	0.291	0.082	5.95026920617911E-20	0	0.452284110319053	PLANT CADMIUM RESISTANCE 3-like			BGLB021409	3.50618821991668e-07	0.77836777560383	0.518	0.494	0.00593457418103098	1	2.51648097230528	#N/A
BGLB008293	3.71431237854145e-24	0.412393184873269	0.865	0.551	6.28684513191926E-20	0	4.12478327660821	serine threonine- kinase PLK1-like			BGLB023031	3.72414202563322e-07	0.769706928623565	0.452	0.398	0.0063034827925868	1	1.91831051405979	Cyclin-H
BGLB023482	5.4393834458247e-24	0.408290553025189	0.439	0.183	9.20670042040288E-20	0	0.871310985787579	cAMP-specific 3&apos			BGLB032100	5.3541292199203e-07	0.807812884102219	0.268	0.156	0.0090623991176371	1	1.17467171732394	mitogen-activated kinase kinase kinase 2
BGLB001910	7.08466942954321e-24	0.320397666980018	0.462	0.202	1.19915114764448E-19	0	0.880712172242498	MICAL 2			BGLB028111	5.69448587267999e-07	0.772394624560754	0.482	0.438	0.00963848678809814	1	2.23234453357175	tyrosine phosphatse
BGLB010799	1.53951456024884e-23	0.291970263945879	0.589	0.293	2.60578234467719E-19	0	1.26142164061892	PREDICTED: uncharacterized protein LOC106074623 isoform X1; PREDICTED: uncharacterized protein LOC106074623 isoform X2; PREDICTED: uncharacterized protein LOC106074623 isoform X3			BGLB016662	5.78849928155629e-07	0.605666547010256	0.631	0.711	0.00979761388396217	1	3.31413071187729	#N/A
BGLB027949	1.90248461992686e-23	0.4476760263105	0.313	0.096	3.2201454676882E-19	0	0.703367685468764	Pappalysin-1			BGLB016920	5.92252409914601e-07	0.590316548832816	0.411	0.285	0.0100244642902145	1	2.64573542272628	macrophage-expressed gene 1 -like
BGLB000757	1.99758603374642e-23	0.342562420094499	0.821	0.472	3.3811141207192E-19	0	2.50042412842226	Protein FAM107B {ECO:0000305}			BGLB023632	6.14485585411561e-07	0.619120473334113	0.631	0.69	0.0104007830186761	1	3.34149191844287	#N/A
BGLB021062	2.06402015324591e-23	0.312603768276914	0.369	0.132	3.49356051138403E-19	0	0.621431866119567	venom factor-like isoform X1			BGLB037649	6.60447826825759e-07	0.739013981062377	0.31	0.2	0.0111787399168528	1	1.2017300566979	1-phosphatidylinositol 4,5-bisphosphate phosphodiesterase gamma-1 isoform X1
BGLB021924	2.91041195858284e-23	0.266710646024657	0.999	0.972	4.92616328109732E-19	0	20.6095103075771	60S ribosomal L36			BGLB003053	7.0509413089934e-07	0.483234667892571	0.762	0.829	0.0119344232596022	1	4.54948613810031	cytochrome b-c1 complex subunit mitochondrial-like
BGLB033288	2.92773489404971e-23	0.475744977950462	0.318	0.105	4.95548408166854E-19	0	0.686642697161593	thyrotropin-releasing hormone receptor-like			BGLB022230	7.05683099020385e-07	0.813869840154725	0.345	0.239	0.011944392134019	1	1.57252018873407	D(2) dopamine receptor-like isoform X1
BGLB016873	4.37800630288136e-23	0.370799865391966	0.655	0.357	7.41021346825699E-19	0	1.67747421128398	unconventional myosin-IXa-like isoform X1; unconventional myosin-IXb-like isoform X4			BGLB038912	8.01950726863674e-07	0.843177325883505	0.381	0.292	0.0135738180028946	1	1.70051665930707	poly [ADP-ribose] polymerase 15-like
BGLB029432	4.52377874696756e-23	0.341920113323757	0.636	0.329	7.65694790711729E-19	0	1.32339640536604	PREDICTED: beta-parvin-like			BGLB006505	8.82467261915625e-07	0.480876244754778	0.756	0.846	0.0149366408751839	1	4.8961051571527	ras-related Rap-1b
BGLB020604	5.60563290538315e-23	0.3448801421322	0.371	0.141	9.48809425565153E-19	0	0.655999023394847	cGMP-dependent kinase 1-like			BGLB000632	9.03457027759286e-07	0.527147369216152	0.637	0.716	0.0152919136518537	1	2.96118563840241	NADH dehydrogenase [ubiquinone] iron-sulfur mitochondrial
BGLB032124	5.65029510260573e-23	0.277112314857124	0.707	0.383	9.56368949067046E-19	0	1.67001940900816	transmembrane 179			BGLB018680	1.04840165344112e-06	0.665946398981228	0.375	0.275	0.0177452463861444	1	1.40937145664255	#N/A
BGLB032592	6.09352745821854e-23	0.435624679074242	0.909	0.641	1.03139045757807E-18	0	9.6900376933039	ATP synthase F0 subunit 6 (mitochondrion)			BGLB020876	1.08572368546743e-06	0.713546217875046	0.506	0.485	0.0183769591002218	1	2.21272405766711	arf-GAP with SH3 ANK repeat and PH domain-containing 2-like
BGLB000804	7.9805096041681e-23	0.344848408417411	0.529	0.254	1.35078105560149E-18	0	1.08735699708711	transketolase 2 isoform X1			BGLB028546	1.11647557173112e-06	0.876804752780896	0.827	0.889	0.0188974655271209	1	18.1846682622641	atrial natriuretic peptide-converting enzyme-like
BGLB028001	8.61430194321601e-23	0.366556306040386	0.361	0.136	1.45805674690874E-18	0	0.585311018679369	muscle-specific 20-like			BGLB010208	1.38044987350869e-06	0.519560178917323	0.679	0.743	0.0233654945590081	1	3.87349738842787	serine arginine-rich splicing factor 7-like
BGLB000096	8.86743622080902e-23	0.410454268597498	0.272	0.073	1.50090225473413E-18	0	0.495795780387189	fibrinogen C domain-containing protein 1-B-like			BGLB026769	1.39641769940215e-06	0.319964719565152	0.976	0.914	0.0236357659800808	1	25.0641883171492	rho-related GTP-binding -like
BGLB019022	9.89487249211204e-23	0.367143321473813	0.275	0.075	1.67480611801488E-18	0	0.451367303404589	sucrase- intestinal			BGLB020637	1.52331034845784e-06	0.721738901458703	0.518	0.518	0.0257835509579975	1	2.42858112864208	probable 28S ribosomal mitochondrial
BGLB027305	1.17848298693902e-22	0.335468267299921	0.297	0.092	1.99470030369298E-18	0	0.4849236122963	Rotamase SurA {ECO:0000255			BGLB023804	1.55763743472138e-06	0.684404494285129	0.571	0.592	0.0263645712200941	1	2.71535158671634	39S ribosomal mitochondrial-like
BGLB024160	1.46670989834222e-22	0.341159030180518	0.552	0.272	2.48255317393405E-18	0	1.13053266178609	integrin beta-PS-like			BGLB039741	1.71975592032323e-06	0.954238659809416	0.387	0.305	0.029108588707391	1	1.99350913499355	allene oxide synthase-lipoxygenase -like
BGLB035051	1.53530836193782e-22	0.324635196487189	0.432	0.176	2.59866293341595E-18	0	0.891410852816616	prominin-1-A-like isoform X1			BGLB035430	1.79406486452977e-06	0.663221130857211	0.31	0.204	0.0303663418970309	1	1.10919967434531	receptor-type tyrosine-protein phosphatase T-like isoform X2
BGLB032574	1.83233836594297e-22	0.421169821644908	0.264	0.071	3.10141591819507E-18	0	0.508330297464859	AT-rich interactive domain-containing protein 1B-like			BGLB027611	1.82769610070553e-06	0.624598385926227	0.637	0.724	0.0309355842005418	1	3.74052632346602	#N/A
BGLB004928	1.93630154681987e-22	0.322168530256441	0.981	0.782	3.27738399814731E-18	0	10.4118144638845	quinone oxidoreductase isoform X2			BGLB002875	2.05364503463337e-06	0.553265371754103	0.673	0.788	0.0347599958562044	1	3.74639805006249	proteasome subunit beta type-1
BGLB022570	2.26294676436312e-22	0.332295761824571	0.288	0.085	3.83026369336102E-18	0	0.470998988042395	Ankyrin repeat domain-containing protein 50			BGLB016360	2.22019013365923e-06	0.876746795919155	0.405	0.337	0.0375789382023161	1	1.94188661601465	peroxisomal sarcosine oxidase
BGLB010408	2.68721308425799e-22	0.527191332380799	0.553	0.287	4.54837686641507E-18	0	1.93371257559658	cAMP-responsive element modulator-like isoform X1			BGLB027092	2.2688967654374e-06	0.505761098795351	0.827	0.901	0.0384033466517934	1	7.58452743084748	PREDICTED: porimin-like
BGLB035230	2.75659458787985e-22	0.339024378475757	0.499	0.235	4.66581199944544E-18	0	0.968881163232995	tubulin polymerization-promoting family member 2
BGLB020393	3.34967440793092e-22	0.375520321725864	0.348	0.129	5.66965890286388E-18	0	0.636873500436205	diacyglycerol O-acyltransferase MT1809
BGLB029277	3.99636306607977e-22	0.267289964888746	0.472	0.213	6.76424412564662E-18	0	0.956694836334961	stabilin-2 isoform X2
BGLB002185	4.93961116206125e-22	0.334874707195866	0.527	0.256	8.36078585290487E-18	0	1.09823052087621	cyclin-dependent kinase 17-like isoform X2
BGLB035987	5.14170927947017e-22	0.307563104021657	0.406	0.166	8.70285712643122E-18	0	0.688202342674804	Proto-oncogene tyrosine-protein kinase ROS
BGLB032019	5.3642647721315e-22	0.306539244586936	0.34	0.117	9.07955455330978E-18	0	0.515909835829452	UPF0669 C6orf120 homolog
BGLB001425	1.02426948133796e-21	0.366451094120039	0.869	0.57	1.73367852411264E-17	0	2.99547223601091	Nuclear factor erythroid 2-related factor
BGLB024842	1.04233390214931e-21	0.434731095515758	0.917	0.664	1.76425436277793E-17	0	7.71999937027725	NADH dehydrogenase subunit 3 (mitochondrion)
BGLB036370	1.48485550101278e-21	0.370669551327822	0.969	0.73	2.51326642101423E-17	0	11.0614314518206	NADH dehydrogenase subunit 1 (mitochondrion)
BGLB012534	2.97240328016325e-21	0.283241239546975	0.998	0.951	5.03108979200431E-17	0	15.7436717297505	60S ribosomal L37a
BGLB016815	3.03753733965249e-21	0.264927577935729	0.63	0.326	5.1413357010958E-17	0	1.47474287187	polypyrimidine tract-binding 2-like isoform X1
BGLB037861	4.38669125011898e-21	0.314872889179513	0.565	0.287	7.42491360995138E-17	0	1.23689885139841	PREDICTED: uncharacterized protein LOC106053794 isoform X1
BGLB033225	5.45699179936194e-21	0.299909624285476	0.664	0.368	9.23650431960002E-17	0	1.71588070123824	cytidine deaminase
BGLB011552	6.30056114979323e-21	0.325100192006912	0.74	0.413	1.066432980214E-16	0	2.18286945407293	H ACA ribonucleo complex subunit 4
BGLB007772	6.55982516560917e-21	0.308430163298266	0.746	0.425	1.11031600753101E-16	0	1.83462803338692	Oligosaccharyltransferase complex subunit ostc-B
BGLB039822	9.45103794007759e-21	0.341820796223212	0.335	0.125	1.59968268173753E-16	0	0.628347042728027	solute carrier family 22 member 6-A-like
BGLB017703	1.00438738771865e-20	0.409950332289882	0.624	0.34	1.70002609245258E-16	0	1.59153026957152	still isoform SIF type 1-like isoform X1
BGLB038170	2.05276097345463e-20	0.35276585990506	0.298	0.098	3.4745032236693E-16	0	0.576666797675362	Regulator of nonsense transcripts 1
BGLB025521	2.2646766233951e-20	0.385595635217079	0.317	0.117	3.83319165275854E-16	0	0.614506291789538	#N/A
BGLB014446	2.46518223127699e-20	0.346199340107885	0.516	0.265	4.17256744465944E-16	0	1.14022498864107	nuclear hormone receptor HR96-like isoform X14
BGLB037012	2.65835451362162e-20	0.355875772740321	0.468	0.22	4.49953084975596E-16	0	0.964005666113972	Nuclear Factor of Kappa light polypeptide gene enhancer in b(B)-cells n
BGLB031374	2.68891349896334e-20	0.271590436877391	0.4	0.171	4.55125498834536E-16	0	0.662426122464383	cytosolic phospholipase A2-like isoform X5
BGLB007667	2.81365003376407e-20	0.273793350890968	0.987	0.833	4.76238404714907E-16	0	6.77006664903724	ATP synthase subunit mitochondrial
BGLB040021	3.69314064670451e-20	0.321526052497776	0.971	0.798	6.25100985861205E-16	0	6.2924363764974	NADH dehydrogenase [ubiquinone] 1 alpha subcomplex subunit 11
BGLB038328	6.0249223009454e-20	0.323023183283443	0.991	0.838	1.01977834865802E-15	0	8.90633459585549	Caprin-1
BGLB032817	7.40189640131421e-20	0.261035284640251	0.695	0.387	1.25284498488644E-15	0	1.56297274677132	Protein DA1-related 6
BGLB039414	7.92964918238652e-20	0.278212938008518	0.275	0.085	1.34217242061074E-15	0	0.403447119694364	snake venom metalloproteinase atrolysin-C-like
BGLB021257	8.14381063304186e-20	0.345248359796263	0.87	0.578	1.37842138774867E-15	0	5.37832359334016	NADH dehydrogenase subunit 4 (mitochondrion)
BGLB016341	8.57495157914804e-20	0.300449806984437	0.571	0.298	1.4513963042866E-15	0	1.11150543417969	ras-like GTP-binding Rho1
BGLB020946	8.96677344529647e-20	0.254607403529108	0.978	0.777	1.51771607335088E-15	0	6.76006801677	Cyclin-I
BGLB006596	1.16482692832759e-19	0.327211782958246	0.804	0.484	1.97158605888728E-15	0	2.44796518977324	myosin regulatory light chain 12B
BGLB018535	8.73205457639043e-19	0.256400124658597	0.997	0.93	1.47798755759984E-14	0	14.7125085668894	ras-like GTP-binding Rho1 isoform X2
BGLB036295	1.11084383435048e-18	0.278626426662016	0.284	0.099	1.88021427402162E-14	0	0.440594978855875	rolling stone-like
BGLB014246	1.39587271490975e-18	0.251888943926311	0.557	0.293	2.36265415725625E-14	0	1.1051788853296	ecdysone-induced 74EF isoform A-like
BGLB027033	1.81747200514334e-18	0.315359406359947	0.278	0.098	3.07625311590562E-14	0	0.439398958983691	indoleamine 2,3-dioxygenase 1
BGLB000581	1.93426197045117e-18	0.271392718481608	0.369	0.162	3.27393181118566E-14	0	0.61014382089758	tubulin alpha-3 chain
BGLB037153	2.37997572882788e-18	1.18032309432976	0.268	0.092	4.02834691861407E-14	0	2.38052876996354	BPTI/Kunitz domain-containing protein 4-like isoform X1
BGLB025597	2.50107384763684e-18	0.320832813101778	0.933	0.695	4.23331759451012E-14	0	4.25950455209635	glia maturation factor beta; glia maturation factor beta-like
BGLB026016	2.7510786738681e-18	0.30218189763512	0.324	0.129	4.65647576338914E-14	0	0.539799504368728	diacylglycerol kinase delta-like
BGLB000767	3.85274973628425e-18	0.29633220689876	0.941	0.667	6.52116420363473E-14	0	4.15367669698028	actin-related 2 3 complex subunit 4
BGLB016936	4.33424086180111e-18	0.290841821009108	0.741	0.432	7.33613608268455E-14	0	2.05542977035865	ras GTPase-activating IQGAP1 isoform X1
BGLB018760	4.77964602542959e-18	0.326230770110543	0.303	0.113	8.09002886264213E-14	0	0.567865683499991	rolling stone-like
BGLB008255	6.62753823305553e-18	0.289730358572236	0.905	0.575	1.12177712132698E-13	0	3.38824786812421	actin-related 3
BGLB032924	6.76388196373162e-18	0.31130026535817	0.315	0.127	1.14485466118121E-13	0	0.567403647397223	A-kinase anchor protein 13-like isoform X1
BGLB028162	1.06326378055934e-17	0.254509720086716	0.324	0.127	1.79968027497474E-13	0	0.53751715615887	Switch-associated protein 70
BGLB020742	1.29719259737123e-17	0.328394819393864	0.441	0.225	2.19562819031054E-13	0	0.856790386768049	leucine-rich PPR motif-containing mitochondrial
BGLB020052	1.6116968193669e-17	0.325172773760765	0.918	0.688	2.72795803646042E-13	0	4.31027551581507	elongation factor 1-delta-like isoform X2; elongation factor 1-delta-like isoform X1
BGLB013108	1.75822691670746e-17	0.339986935311919	0.914	0.627	2.97597487921904E-13	0	4.22920145774197	RNA polymerase II elongation factor ELL
BGLB038828	1.99802396155059e-17	0.525288320324228	0.447	0.23	3.38185535732053E-13	0	3.08290608627834	ABC transporter C family member 13
BGLB027931	2.03690934115057e-17	0.276666178086371	0.693	0.427	3.44767275083145E-13	0	1.98864153811089	NADH dehydrogenase subunit 2 (mitochondrion)
BGLB012522	2.63619708623047e-17	0.281443788781398	0.866	0.57	4.4620271881537E-13	0	2.68308574580614	transmembrane emp24 domain-containing eca-like isoform X1
BGLB021606	2.73550871225602e-17	0.282543050034364	0.271	0.099	4.63012204636454E-13	0	0.412651668542747	#N/A
BGLB027158	3.39494327698912e-17	0.28112019176589	0.487	0.249	5.74628099063179E-13	0	1.00254724852826	snRNA-activating complex subunit 3 isoform X1
BGLB031885	3.83049395601369e-17	0.251181112352474	0.266	0.096	6.48349406994878E-13	0	0.394388499182106	PREDICTED: uncharacterized protein LOC106079948
BGLB020764	4.78932988595245e-17	0.298276241545772	0.401	0.188	8.10641976496311E-13	0	0.751033583366901	PREDICTED: uncharacterized protein LOC106074381
BGLB024562	1.20220853668088e-16	0.293360556265756	0.857	0.552	2.03485816918606E-12	0	3.91235872938003	PREDICTED: uncharacterized protein LOC106077253
BGLB021805	1.39816987019127e-16	0.306874046444778	0.863	0.577	2.36654232228575E-12	0	3.08624140428947	sorting nexin-24; sorting nexin-24-like
BGLB021814	1.4858016398788e-16	0.278517627908033	0.268	0.096	2.51486785565885E-12	0	0.480399125830265	nuclear protein localization protein 4 homolog
BGLB003191	2.72574008758398e-16	0.35633766892574	0.627	0.38	4.61358767224465E-12	0	1.93591313783344	B-box type zinc finger ncl-1-like
BGLB035450	2.91464032159035e-16	0.456300039913058	0.269	0.099	4.93332020832383E-12	0	0.7932489666657	neuroblast differentiation-associated AHNAK isoform X1
BGLB035125	4.35323112043857e-16	0.269573596895253	0.326	0.136	7.36827899445432E-12	0	0.62878703662612	multiple epidermal growth factor-like domains protein 11
BGLB002777	4.59294457450801e-16	0.256785710860084	0.907	0.613	7.77401798681226E-12	0	3.68303088704793	translocon-associated subunit gamma-like
BGLB016910	4.82735427289412e-16	0.274377935086508	0.603	0.35	8.17077984230059E-12	0	1.40116469538459	talin-2-like isoform X2; talin-2-like isoform X1
BGLB040402	6.13978904750269e-16	0.251118254493408	0.326	0.143	1.0392206941803E-11	0	0.626589828174941	plexin-A2-like isoform X1
BGLB027020	1.06374282291279e-15	0.259726742329318	0.383	0.181	1.80049110206219E-11	0	0.651482836512641	PREDICTED: uncharacterized protein LOC106068494 isoform X4
BGLB026296	2.58542595286908e-15	0.281396187729585	0.639	0.369	4.3760919678262E-11	0	1.73568260903679	PREDICTED: uncharacterized protein LOC106069525
BGLB022629	3.79816337771367e-15	0.305116434461737	0.932	0.69	6.42877133311817E-11	0	8.60757285085625	cytochrome c oxidase subunit III (mitochondrion)
BGLB037336	9.66976399848098e-15	0.254200054462991	0.291	0.131	1.63670425438289E-10	0	0.437375646994669	1,4-beta-N-acetylmuramidase
BGLB030594	9.67019570198183e-15	0.259485993751788	0.26	0.101	1.63677732451744E-10	0	0.42854570449926	PREDICTED: uncharacterized protein LOC106070898
BGLB010093	1.16431570530991e-13	0.269217675030001	0.255	0.106	1.97072076280755E-09	0	0.423574413691188	phospholipid-transporting ATPase ID-like
BGLB033881	1.21969520266802e-13	0.273507972330637	0.942	0.69	2.06445610003589E-09	0	4.44639118861186	60S ribosomal L37a
BGLB019393	1.64493158092083e-12	0.261983205094714	0.963	0.786	2.78421119386659E-08	0	19.2700585678517	cytochrome b (mitochondrion)
BGLB030996	3.44507790107843e-12	0.641552846269178	0.277	0.131	5.83113885536535E-08	0	2.51561142884835	#N/A
[truncated: 21 more columns]

## Sheet: Top 5 marker genes
	Gene	Avg log2FC	Pct.1	Pct.2	TPM/cluster	Annotation
Cluster 0	BGLB031971	2.44	0.855	0.195	14.54	Membrane receptor ?
	BGLB017695	1.77	0.931	0.221	6.87	MAM and LDL-receptor class A domain-containing 1-like
	BGLB027794	1.69	0.951	0.246	6.93	fibrinogen C domain-containing protein 1-B-like
	BGLB014448	1.58	0.939	0.279	6.78	von Willebrand factor type EGF and pentraxin domain-containing 1
	BGLB000204	1.43	0.91	0.225	9.14	fibrinogen-related protein 3.2
Cluster 1	BGLB020262	5.67	0.976	0.013	52.54	transmembrane 97-like
	BGLB022517	5.43	0.964	0.01	44.1	PREDICTED: ATPase inhibitor B, mitochondrial-like
	BGLB027140	3.86	0.893	0.004	13.65	histone chaperone RTT106-like
	BGLB021706	3.85	0.869	0.004	13.69	PREDICTED: uncharacterized protein LOC106059532, partial
	BGLB016746	3.47	0.81	0.039	10.94	fibrinogen-related protein J1 precursor
Cluster 2	BGLB029994	4.46	0.633	0.17	34.92	PREDICTED: uncharacterized protein LOC106074468
	BGLB034757	4.38	0.753	0.065	27.95	apolipophorins-like isoform X1
	BGLB025987	2.82	0.68	0.112	7.33	platelet endothelial aggregation receptor 1-like
	BGLB030828	2.59	0.767	0.18	12.78	PREDICTED: uncharacterized protein LOC106077476
	BGLB020152	2.23	0.653	0.163	5.30	PREDICTED: uncharacterized protein LOC106059715
Cluster 3	BGLB004464	5.81	0.846	0.073	77.41	cathepsin Z
	BGLB033286	5.25	0.934	0.018	39.67	PREDICTED: uncharacterized LOC106059074 (LOC106059074)
	BGLB033224	5.15	0.978	0.02	37.73	PREDICTED: uncharacterized protein LOC106065593 isoform X1
	BGLB022969	4.96	0.934	0.06	51.55	PREDICTED: uncharacterized LOC106059946 (LOC106059946)
	BGLB012422	2022-05-04	0.912	0.064	20.98	cathepsin L1-like
Cluster 4	BGLB018713	1.52	0.866	0.238	2022-10-03	proliferating cell nuclear antigen
	BGLB016332	1.28	0.854	0.181	2.24	DNA replication licensing factor mcm7-like
	BGLB039641	1.24	0.854	0.168	2022-03-02	thymidylate kinase
	BGLB033708	2022-11-01	0.805	0.235	2022-02-02	replication A 32 kDa subunit
	BGLB010074	2022-05-01	0.805	0.245	1.96	Replication factor C subunit 2
Cluster 5	BGLB020372	5.94	0.976	0.158	88.63	turripeptide Ici9.2
	BGLB037767	2022-10-05	0.952	0.109	44.01	holotricin-3-like
	BGLB019227	2022-08-05	0.976	0.083	41.34	PREDICTED: uncharacterized LOC106051227 (LOC106051227)
	BGLB012494	4.88	0.952	0.112	37.16	PREDICTED: uncharacterized LOC106079846 (LOC106079846)
	BGLB021818	3.67	0.905	0.056	13.36	ganglioside GM2 activator
Cluster 6	BGLB009257	6.55	1	0.01	94.22	PREDICTED: uncharacterized protein LOC106071093
	BGLB031439	4.71	0.976	0.002	25.35	Disintegrin and metalloprotease domain-containing protein 30
	BGLB021024	4.28	0.976	0.005	18.66	PREDICTED: uncharacterized LOC106079318 (LOC106079318)
	BGLB021865	4.27	0.951	0.01	18.47	Collagen alpha-1(I) chain
	BGLB033389	3.76	0.951	0.002	12.65	PREDICTED: uncharacterized LOC106069889 (LOC106069889)

## Sheet: Mitochondrial genes
Mitochondrial genes
BGLB025045	NADH dehydrogenase subunit 6 (mitochondrion)
BGLB031083	NADH dehydrogenase subunit 5 (mitochondrion)
BGLB036370	NADH dehydrogenase subunit 1 (mitochondrion)
BGLB034537	NADH dehydrogenase subunit (mitochondrion)
BGLB032276	NADH dehydrogenase subunit 4L (mitochondrion)
BGLB032435	cytochrome b (mitochondrion)
BGLB019393	cytochrome b (mitochondrion)
BGLB019394	cytochrome c oxidase subunit II (mitochondrion)
BGLB039788	cytochrome c oxidase subunit II (mitochondrion)
BGLB032592	ATP synthase F0 subunit 6 (mitochondrion)
BGLB024842	NADH dehydrogenase subunit 3 (mitochondrion)
BGLB021257	NADH dehydrogenase subunit 4 (mitochondrion)
BGLB012929	cytochrome c oxidase subunit III (mitochondrion)
BGLB022629	cytochrome c oxidase subunit III (mitochondrion)
BGLB027931	NADH dehydrogenase subunit 2 (mitochondrion)
BGLB034179	cytochrome c oxidase subunit I (mitochondrion)
