# Supplementary material for: Single cell RNA sequencing reveals hemocyte heterogeneity in Biomphalaria glabrata: Plasticity over diversity
Source: Front Immunol. 2022 Sep 5;13:956871. doi: 10.3389/fimmu.2022.956871 (PMC9484523; doi:10.3389/fimmu.2022.956871)
Supplement: Supplementary file 6 [file Table_3.xlsx]

## Sheet: Cluster 0
Supplementary Table 3. Each sheet of the table represents the blast2GO enrichment list of the total marker genes defined for each of the transcriptomic clusters.
GO ID	GO Name	GO Category	FDR	P-value
GO:0006091	generation of precursor metabolites and energy	BIOLOGICAL_PROCESS	1.162025444565842E-6	1.0295255112659183E-10
GO:0030029	actin filament-based process	BIOLOGICAL_PROCESS	1.8482262794755434E-6	4.912446919842855E-10
GO:0030036	actin cytoskeleton organization	BIOLOGICAL_PROCESS	1.8482262794755434E-6	4.3360693617586134E-10
GO:0046034	ATP metabolic process	BIOLOGICAL_PROCESS	6.447711210593257E-6	2.2850044159097214E-9
GO:0007015	actin filament organization	BIOLOGICAL_PROCESS	7.340675268159722E-4	3.902192930713062E-7
GO:0006757	ATP generation from ADP	BIOLOGICAL_PROCESS	0.003808143305576422	3.7113118066218346E-6
GO:0006096	glycolytic process	BIOLOGICAL_PROCESS	0.003808143305576422	3.7113118066218346E-6
GO:0046031	ADP metabolic process	BIOLOGICAL_PROCESS	0.004653941388120525	5.742971587145732E-6
GO:0009135	purine nucleoside diphosphate metabolic process	BIOLOGICAL_PROCESS	0.004653941388120525	6.597241269595854E-6
GO:0009179	purine ribonucleoside diphosphate metabolic process	BIOLOGICAL_PROCESS	0.004653941388120525	6.597241269595854E-6
GO:0009185	ribonucleoside diphosphate metabolic process	BIOLOGICAL_PROCESS	0.004653941388120525	6.597241269595854E-6
GO:0007010	cytoskeleton organization	BIOLOGICAL_PROCESS	0.004653941388120525	6.0958364580796084E-6
GO:0006165	nucleoside diphosphate phosphorylation	BIOLOGICAL_PROCESS	0.005658225330923933	9.816721921424888E-6
GO:0006090	pyruvate metabolic process	BIOLOGICAL_PROCESS	0.005658225330923933	9.816721921424888E-6
GO:0016052	carbohydrate catabolic process	BIOLOGICAL_PROCESS	0.007071178902483886	1.3156264459303766E-5
GO:0046939	nucleotide phosphorylation	BIOLOGICAL_PROCESS	0.007823319464966042	1.8021290519103134E-5
GO:0009132	nucleoside diphosphate metabolic process	BIOLOGICAL_PROCESS	0.008444647060888306	2.020071503889291E-5
GO:0005975	carbohydrate metabolic process	BIOLOGICAL_PROCESS	0.010255750219786215	2.544174768796084E-5
GO:0097435	supramolecular fiber organization	BIOLOGICAL_PROCESS	0.012633803684195508	3.515727827674343E-5
GO:0006412	translation	BIOLOGICAL_PROCESS	0.021480065878442464	6.570796634326809E-5
GO:0030168	platelet activation	BIOLOGICAL_PROCESS	0.02868599005156472	9.657726782665538E-5
GO:0043043	peptide biosynthetic process	BIOLOGICAL_PROCESS	0.02868599005156472	9.586695149529662E-5
GO:0006518	peptide metabolic process	BIOLOGICAL_PROCESS	0.031812486114238814	1.0992176472537553E-4
GO:0030041	actin filament polymerization	BIOLOGICAL_PROCESS	0.036614575845165635	1.3300235754866582E-4
GO:0043604	amide biosynthetic process	BIOLOGICAL_PROCESS	0.043066795978308876	1.640712525088404E-4
GO:0043603	cellular amide metabolic process	BIOLOGICAL_PROCESS	0.04422245204760006	1.723919456094979E-4
GO:0009051	pentose-phosphate shunt, oxidative branch	BIOLOGICAL_PROCESS	0.04586756866168023	2.0318759928094368E-4
GO:0009611	response to wounding	BIOLOGICAL_PROCESS	0.04586756866168023	1.9503197021376235E-4
GO:0019322	pentose biosynthetic process	BIOLOGICAL_PROCESS	0.04586756866168023	2.0318759928094368E-4
GO:0150115	cell-substrate junction organization	BIOLOGICAL_PROCESS	0.04925449121287429	2.269188928031774E-4
GO:0007044	cell-substrate junction assembly	BIOLOGICAL_PROCESS	0.04925449121287429	2.269188928031774E-4
GO:0015980	energy derivation by oxidation of organic compounds	BIOLOGICAL_PROCESS	0.06802891930968316	3.2546838333683806E-4
GO:0008154	actin polymerization or depolymerization	BIOLOGICAL_PROCESS	0.06947996833287848	3.4472208971747986E-4
GO:0019637	organophosphate metabolic process	BIOLOGICAL_PROCESS	0.07547932052824377	3.8117491539912246E-4
GO:0010605	negative regulation of macromolecule metabolic process	BIOLOGICAL_PROCESS	0.08492046059313793	4.439006977048939E-4
GO:0042060	wound healing	BIOLOGICAL_PROCESS	0.08921395852889007	4.742480297451408E-4
GO:0019693	ribose phosphate metabolic process	BIOLOGICAL_PROCESS	0.09047226096939262	4.889525931720519E-4
GO:0045995	regulation of embryonic development	BIOLOGICAL_PROCESS	0.09698803011376565	5.757241089414635E-4
GO:0009395	phospholipid catabolic process	BIOLOGICAL_PROCESS	0.09698803011376565	5.757241089414635E-4
GO:0051156	glucose 6-phosphate metabolic process	BIOLOGICAL_PROCESS	0.09698803011376565	5.757241089414635E-4
GO:0006098	pentose-phosphate shunt	BIOLOGICAL_PROCESS	0.09698803011376565	5.757241089414635E-4
GO:0022904	respiratory electron transport chain	BIOLOGICAL_PROCESS	0.10389429235904125	6.351294562570964E-4
GO:0009892	negative regulation of metabolic process	BIOLOGICAL_PROCESS	0.11581926333985064	7.246563888484707E-4
GO:0006740	NADPH regeneration	BIOLOGICAL_PROCESS	0.11609412731426814	7.405667729801813E-4
GO:0051248	negative regulation of protein metabolic process	BIOLOGICAL_PROCESS	0.12129751452312129	7.952525980961261E-4
GO:0030162	regulation of proteolysis	BIOLOGICAL_PROCESS	0.12166554572105985	8.084447531744031E-4
GO:0009150	purine ribonucleotide metabolic process	BIOLOGICAL_PROCESS	0.1404709658740804	9.831847527290113E-4
GO:0042221	response to chemical	BIOLOGICAL_PROCESS	0.14534227841569958	0.0010301570189825433
GO:0032956	regulation of actin cytoskeleton organization	BIOLOGICAL_PROCESS	0.14781250123524647	0.0012003240839963468
GO:0061572	actin filament bundle organization	BIOLOGICAL_PROCESS	0.14781250123524647	0.001153538367261348
GO:0060263	regulation of respiratory burst	BIOLOGICAL_PROCESS	0.14781250123524647	0.0011962137225629227
GO:0046364	monosaccharide biosynthetic process	BIOLOGICAL_PROCESS	0.14781250123524647	0.001153538367261348
GO:0051017	actin filament bundle assembly	BIOLOGICAL_PROCESS	0.14781250123524647	0.001153538367261348
GO:0070527	platelet aggregation	BIOLOGICAL_PROCESS	0.14781250123524647	0.0011962137225629227
GO:0051493	regulation of cytoskeleton organization	BIOLOGICAL_PROCESS	0.15510687120097963	0.0013054977198629454
GO:0032970	regulation of actin filament-based process	BIOLOGICAL_PROCESS	0.15653617384317015	0.0013452652487629577
GO:0022900	electron transport chain	BIOLOGICAL_PROCESS	0.15653617384317015	0.0013452652487629577
GO:0006739	NADP metabolic process	BIOLOGICAL_PROCESS	0.15683856472195135	0.0014048329831341728
GO:0050900	leukocyte migration	BIOLOGICAL_PROCESS	0.15683856472195135	0.0014048329831341728
GO:0051668	localization within membrane	BIOLOGICAL_PROCESS	0.15683856472195135	0.001364065473002431
GO:0045861	negative regulation of proteolysis	BIOLOGICAL_PROCESS	0.15843935095128275	0.001488977758686861
GO:0006006	glucose metabolic process	BIOLOGICAL_PROCESS	0.15843935095128275	0.001501994378646873
GO:0006119	oxidative phosphorylation	BIOLOGICAL_PROCESS	0.15843935095128275	0.001501994378646873
GO:0005996	monosaccharide metabolic process	BIOLOGICAL_PROCESS	0.15940968600130312	0.001525316389487086
GO:0052547	regulation of peptidase activity	BIOLOGICAL_PROCESS	0.169984715927753	0.0016867447668918523
GO:1901135	carbohydrate derivative metabolic process	BIOLOGICAL_PROCESS	0.1711950617528299	0.001713922386645679
GO:0009060	aerobic respiration	BIOLOGICAL_PROCESS	0.1753655767086496	0.0017712125227949016
GO:0009259	ribonucleotide metabolic process	BIOLOGICAL_PROCESS	0.17664507437584745	0.00179978590885288
GO:0006614	SRP-dependent cotranslational protein targeting to membrane	BIOLOGICAL_PROCESS	0.1809826769368667	0.002004326625064972
GO:0097529	myeloid leukocyte migration	BIOLOGICAL_PROCESS	0.1809826769368667	0.00197489880868989
GO:0061333	renal tubule morphogenesis	BIOLOGICAL_PROCESS	0.1809826769368667	0.00197489880868989
GO:0030595	leukocyte chemotaxis	BIOLOGICAL_PROCESS	0.1809826769368667	0.00197489880868989
GO:0034109	homotypic cell-cell adhesion	BIOLOGICAL_PROCESS	0.1809826769368667	0.00197489880868989
GO:0071674	mononuclear cell migration	BIOLOGICAL_PROCESS	0.1809826769368667	0.00197489880868989
GO:0045730	respiratory burst	BIOLOGICAL_PROCESS	0.1809826769368667	0.00197489880868989
GO:0007596	blood coagulation	BIOLOGICAL_PROCESS	0.1809826769368667	0.002004326625064972
GO:0006163	purine nucleotide metabolic process	BIOLOGICAL_PROCESS	0.19566970810270082	0.0022189884501768145
GO:0032269	negative regulation of cellular protein metabolic process	BIOLOGICAL_PROCESS	0.20055476069092443	0.0022921559430432578
GO:0006613	cotranslational protein targeting to membrane	BIOLOGICAL_PROCESS	0.20448570427097362	0.0023551999251551848
GO:0045333	cellular respiration	BIOLOGICAL_PROCESS	0.21477825438948459	0.0025118038078685186
GO:0030218	erythrocyte differentiation	BIOLOGICAL_PROCESS	0.2275502760564029	0.0027418124872570916
GO:0045047	protein targeting to ER	BIOLOGICAL_PROCESS	0.2275502760564029	0.0027418124872570916
GO:0051258	protein polymerization	BIOLOGICAL_PROCESS	0.2275502760564029	0.002717203590887933
GO:0007599	hemostasis	BIOLOGICAL_PROCESS	0.2275502760564029	0.0027418124872570916
GO:0008038	neuron recognition	BIOLOGICAL_PROCESS	0.23828238137730487	0.0029344600878395835
GO:0002532	production of molecular mediator involved in inflammatory response	BIOLOGICAL_PROCESS	0.23828238137730487	0.0029344600878395835
GO:0019646	aerobic electron transport chain	BIOLOGICAL_PROCESS	0.25338219228694464	0.003165313113534083
GO:0090150	establishment of protein localization to membrane	BIOLOGICAL_PROCESS	0.2574096180114428	0.003238430562383705
GO:0044087	regulation of cellular component biogenesis	BIOLOGICAL_PROCESS	0.25837808801840967	0.0032735063866955417
GO:0032787	monocarboxylic acid metabolic process	BIOLOGICAL_PROCESS	0.2607667434565041	0.0033492003937868908
GO:0051270	regulation of cellular component movement	BIOLOGICAL_PROCESS	0.26708943992592027	0.0034548647319202937
GO:0006935	chemotaxis	BIOLOGICAL_PROCESS	0.27049760359338937	0.0035229155425027226
GO:0050817	coagulation	BIOLOGICAL_PROCESS	0.2729030624557214	0.003626779424856756
GO:0072599	establishment of protein localization to endoplasmic reticulum	BIOLOGICAL_PROCESS	0.2729030624557214	0.003626779424856756
GO:0034101	erythrocyte homeostasis	BIOLOGICAL_PROCESS	0.2729030624557214	0.003626779424856756
GO:0051172	negative regulation of nitrogen compound metabolic process	BIOLOGICAL_PROCESS	0.2776590450283066	0.0037145845485314338
GO:0006796	phosphate-containing compound metabolic process	BIOLOGICAL_PROCESS	0.2820949409543178	0.003802577389348997
GO:0150116	regulation of cell-substrate junction organization	BIOLOGICAL_PROCESS	0.28505659999968774	0.004069613215934254
GO:0051893	regulation of focal adhesion assembly	BIOLOGICAL_PROCESS	0.28505659999968774	0.004069613215934254
GO:0031532	actin cytoskeleton reorganization	BIOLOGICAL_PROCESS	0.28505659999968774	0.004069613215934254
GO:0034330	cell junction organization	BIOLOGICAL_PROCESS	0.28505659999968774	0.004141869619912181
GO:0090109	regulation of cell-substrate junction assembly	BIOLOGICAL_PROCESS	0.28505659999968774	0.004069613215934254
GO:0002262	myeloid cell homeostasis	BIOLOGICAL_PROCESS	0.28505659999968774	0.004127220079106713
GO:0048041	focal adhesion assembly	BIOLOGICAL_PROCESS	0.28505659999968774	0.004069613215934254
GO:0006793	phosphorus metabolic process	BIOLOGICAL_PROCESS	0.29320706325016027	0.004286273184750283
GO:0042330	taxis	BIOLOGICAL_PROCESS	0.2972606888315046	0.004477214237738618
GO:0090066	regulation of anatomical structure size	BIOLOGICAL_PROCESS	0.2972606888315046	0.004477214237738618
GO:0002181	cytoplasmic translation	BIOLOGICAL_PROCESS	0.2972606888315046	0.004477214237738618
GO:0019318	hexose metabolic process	BIOLOGICAL_PROCESS	0.2972606888315046	0.004477214237738618
GO:0044271	cellular nitrogen compound biosynthetic process	BIOLOGICAL_PROCESS	0.2972606888315046	0.00444247735101139
GO:0042773	ATP synthesis coupled electron transport	BIOLOGICAL_PROCESS	0.304525669739527	0.004667576934963957
GO:0007169	transmembrane receptor protein tyrosine kinase signaling pathway	BIOLOGICAL_PROCESS	0.304525669739527	0.004628861932429352
GO:0016310	phosphorylation	BIOLOGICAL_PROCESS	0.30858688911312326	0.004875043999449101
GO:1902600	proton transmembrane transport	BIOLOGICAL_PROCESS	0.30858688911312326	0.004893864902210425
GO:0010466	negative regulation of peptidase activity	BIOLOGICAL_PROCESS	0.30858688911312326	0.00485709857189907
GO:0030866	cortical actin cytoskeleton organization	BIOLOGICAL_PROCESS	0.3210038839689117	0.0053751868583436085
GO:0030835	negative regulation of actin filament depolymerization	BIOLOGICAL_PROCESS	0.3210038839689117	0.0053751868583436085
GO:0110053	regulation of actin filament organization	BIOLOGICAL_PROCESS	0.3210038839689117	0.005248727164308839
GO:0022604	regulation of cell morphogenesis	BIOLOGICAL_PROCESS	0.3210038839689117	0.005248727164308839
GO:0051693	actin filament capping	BIOLOGICAL_PROCESS	0.3210038839689117	0.0053751868583436085
GO:0002685	regulation of leukocyte migration	BIOLOGICAL_PROCESS	0.3210038839689117	0.0053751868583436085
GO:0043086	negative regulation of catalytic activity	BIOLOGICAL_PROCESS	0.33536885156356544	0.005704865730504524
GO:0031324	negative regulation of cellular metabolic process	BIOLOGICAL_PROCESS	0.3370716195340136	0.005763694743515959
GO:0030203	glycosaminoglycan metabolic process	BIOLOGICAL_PROCESS	0.339853613916836	0.005871485311755385
GO:0031032	actomyosin structure organization	BIOLOGICAL_PROCESS	0.339853613916836	0.005871485311755385
GO:0006612	protein targeting to membrane	BIOLOGICAL_PROCESS	0.3715007826796494	0.006536605304185452
GO:0070972	protein localization to endoplasmic reticulum	BIOLOGICAL_PROCESS	0.3715007826796494	0.006536605304185452
GO:0061326	renal tubule development	BIOLOGICAL_PROCESS	0.3715007826796494	0.00684612056324684
GO:0001678	cellular glucose homeostasis	BIOLOGICAL_PROCESS	0.3715007826796494	0.00684612056324684
GO:0042743	hydrogen peroxide metabolic process	BIOLOGICAL_PROCESS	0.3715007826796494	0.00684612056324684
GO:0030834	regulation of actin filament depolymerization	BIOLOGICAL_PROCESS	0.3715007826796494	0.00684612056324684
GO:0030837	negative regulation of actin filament polymerization	BIOLOGICAL_PROCESS	0.3715007826796494	0.00684612056324684
GO:0060326	cell chemotaxis	BIOLOGICAL_PROCESS	0.3715007826796494	0.00684612056324684
GO:0001952	regulation of cell-matrix adhesion	BIOLOGICAL_PROCESS	0.3715007826796494	0.00684612056324684
GO:0022603	regulation of anatomical structure morphogenesis	BIOLOGICAL_PROCESS	0.3715007826796494	0.006714001562042584
GO:0019321	pentose metabolic process	BIOLOGICAL_PROCESS	0.3715007826796494	0.00684612056324684
GO:0072521	purine-containing compound metabolic process	BIOLOGICAL_PROCESS	0.37721655189940057	0.0069848728047288665
GO:0016042	lipid catabolic process	BIOLOGICAL_PROCESS	0.37933704014643566	0.007057745940529059
GO:0034329	cell junction assembly	BIOLOGICAL_PROCESS	0.3875443555087566	0.007244782405630162
GO:0010467	gene expression	BIOLOGICAL_PROCESS	0.4011095852562813	0.007533909105549007
GO:0050878	regulation of body fluid levels	BIOLOGICAL_PROCESS	0.40821826233126096	0.007996655132032352
GO:0006753	nucleoside phosphate metabolic process	BIOLOGICAL_PROCESS	0.40821826233126096	0.00924998941000236
GO:0048519	negative regulation of biological process	BIOLOGICAL_PROCESS	0.40821826233126096	0.008601746703033876
GO:0030865	cortical cytoskeleton organization	BIOLOGICAL_PROCESS	0.40821826233126096	0.008477462665760478
GO:0009117	nucleotide metabolic process	BIOLOGICAL_PROCESS	0.40821826233126096	0.00863702104973735
GO:0051246	regulation of protein metabolic process	BIOLOGICAL_PROCESS	0.40821826233126096	0.008135021720800249
GO:0044042	glucan metabolic process	BIOLOGICAL_PROCESS	0.40821826233126096	0.009633768890413254
GO:0051346	negative regulation of hydrolase activity	BIOLOGICAL_PROCESS	0.40821826233126096	0.008478385469819275
GO:1901888	regulation of cell junction assembly	BIOLOGICAL_PROCESS	0.40821826233126096	0.008477462665760478
GO:0051051	negative regulation of transport	BIOLOGICAL_PROCESS	0.40821826233126096	0.008792807109559498
GO:0044237	cellular metabolic process	BIOLOGICAL_PROCESS	0.40821826233126096	0.008048121923130659
GO:0044242	cellular lipid catabolic process	BIOLOGICAL_PROCESS	0.40821826233126096	0.009429778538558121
GO:0006073	cellular glucan metabolic process	BIOLOGICAL_PROCESS	0.40821826233126096	0.009633768890413254
GO:0005840	ribosome	CELLULAR_COMPONENT	0.0011246854913221334	6.975102719283189E-7
GO:0044391	ribosomal subunit	CELLULAR_COMPONENT	0.005658225330923933	1.0026092550587281E-5
GO:0070062	extracellular exosome	CELLULAR_COMPONENT	0.007525677582183418	1.466863708762605E-5
GO:0065010	extracellular membrane-bounded organelle	CELLULAR_COMPONENT	0.00764957327095689	1.69433269933483E-5
GO:1903561	extracellular vesicle	CELLULAR_COMPONENT	0.00764957327095689	1.6346966355115617E-5
GO:0043230	extracellular organelle	CELLULAR_COMPONENT	0.00764957327095689	1.69433269933483E-5
GO:0022626	cytosolic ribosome	CELLULAR_COMPONENT	0.014964561041668711	4.375214976300766E-5
GO:0005615	extracellular space	CELLULAR_COMPONENT	0.021480065878442464	6.660780594892233E-5
GO:0030017	sarcomere	CELLULAR_COMPONENT	0.04586756866168023	2.0080872871500708E-4
GO:0015629	actin cytoskeleton	CELLULAR_COMPONENT	0.05636687372314824	2.64680101650293E-4
GO:0030016	myofibril	CELLULAR_COMPONENT	0.07897175008136696	4.0580858551601703E-4
GO:0070161	anchoring junction	CELLULAR_COMPONENT	0.093080795980752	5.112970099057875E-4
GO:0043292	contractile fiber	CELLULAR_COMPONENT	0.11581926333985064	7.285521127960836E-4
GO:0015934	large ribosomal subunit	CELLULAR_COMPONENT	0.11726194057119382	7.584053921943075E-4
GO:0031672	A band	CELLULAR_COMPONENT	0.14781250123524647	0.0011962137225629227
GO:0005853	eukaryotic translation elongation factor 1 complex	CELLULAR_COMPONENT	0.14781250123524647	0.0011962137225629227
GO:0022625	cytosolic large ribosomal subunit	CELLULAR_COMPONENT	0.14781250123524647	0.0012048152842777243
GO:0030055	cell-substrate junction	CELLULAR_COMPONENT	0.15510687120097963	0.0013054977198629454
GO:0005925	focal adhesion	CELLULAR_COMPONENT	0.15510687120097963	0.0013054977198629454
GO:0005737	cytoplasm	CELLULAR_COMPONENT	0.15683856472195135	0.0014299842775681402
GO:0043228	non-membrane-bounded organelle	CELLULAR_COMPONENT	0.16665069444713385	0.0016241318675631012
GO:0043232	intracellular non-membrane-bounded organelle	CELLULAR_COMPONENT	0.16665069444713385	0.0016241318675631012
GO:0005829	cytosol	CELLULAR_COMPONENT	0.16923821606020975	0.0016643432251867885
GO:0031982	vesicle	CELLULAR_COMPONENT	0.1809826769368667	0.0018912559445849548
GO:1990904	ribonucleoprotein complex	CELLULAR_COMPONENT	0.18724678028939032	0.002090289210282908
GO:0030018	Z disc	CELLULAR_COMPONENT	0.23828238137730487	0.0029344600878395835
GO:0005576	extracellular region	CELLULAR_COMPONENT	0.2607667434565041	0.0033499758838657825
GO:0031674	I band	CELLULAR_COMPONENT	0.28505659999968774	0.004069613215934254
GO:0015935	small ribosomal subunit	CELLULAR_COMPONENT	0.28505659999968774	0.004141869619912181
GO:0016459	myosin complex	CELLULAR_COMPONENT	0.304525669739527	0.004667576934963957
GO:0005885	Arp2/3 protein complex	CELLULAR_COMPONENT	0.3210038839689117	0.0053751868583436085
GO:0005892	acetylcholine-gated channel complex	CELLULAR_COMPONENT	0.3715007826796494	0.00684612056324684
GO:0031252	cell leading edge	CELLULAR_COMPONENT	0.40821826233126096	0.009633768890413254
GO:0003779	actin binding	MOLECULAR_FUNCTION	5.096207167569436E-4	2.2575561121508974E-7
GO:0005198	structural molecule activity	MOLECULAR_FUNCTION	0.003808143305576422	3.5622712766190686E-6
GO:0008092	cytoskeletal protein binding	MOLECULAR_FUNCTION	0.003808143305576422	2.9085561467502102E-6
GO:0003735	structural constituent of ribosome	MOLECULAR_FUNCTION	0.0048859976477572346	7.359082130935853E-6
GO:0004690	cyclic nucleotide-dependent protein kinase activity	MOLECULAR_FUNCTION	0.010604547890882813	2.8186093446131334E-5
GO:0004692	cGMP-dependent protein kinase activity	MOLECULAR_FUNCTION	0.010604547890882813	2.8186093446131334E-5
GO:0015453	oxidoreduction-driven active transmembrane transporter activity	MOLECULAR_FUNCTION	0.012633803684195508	3.58183501279575E-5
GO:0004623	phospholipase A2 activity	MOLECULAR_FUNCTION	0.02618752610722794	8.35253778559587E-5
GO:0008137	NADH dehydrogenase (ubiquinone) activity	MOLECULAR_FUNCTION	0.036614575845165635	1.3300235754866582E-4
GO:0030553	cGMP binding	MOLECULAR_FUNCTION	0.04108798212552903	1.5289228752301046E-4
GO:0003955	NAD(P)H dehydrogenase (quinone) activity	MOLECULAR_FUNCTION	0.04586756866168023	2.0080872871500708E-4
GO:0050136	NADH dehydrogenase (quinone) activity	MOLECULAR_FUNCTION	0.04586756866168023	2.0080872871500708E-4
GO:0016655	oxidoreductase activity, acting on NAD(P)H, quinone or similar compound as acceptor	MOLECULAR_FUNCTION	0.06947996833287848	3.4472208971747986E-4
GO:0003954	NADH dehydrogenase activity	MOLECULAR_FUNCTION	0.09698803011376565	5.505253745443544E-4
GO:0016616	oxidoreductase activity, acting on the CH-OH group of donors, NAD or NADP as acceptor	MOLECULAR_FUNCTION	0.10156589018532403	6.118969196954047E-4
GO:0061134	peptidase regulator activity	MOLECULAR_FUNCTION	0.1237702532035471	8.333958752077239E-4
GO:0030551	cyclic nucleotide binding	MOLECULAR_FUNCTION	0.1367089688131338	9.326296268814834E-4
GO:0016614	oxidoreductase activity, acting on CH-OH group of donors	MOLECULAR_FUNCTION	0.13960465397397534	9.64752636658995E-4
GO:0005536	glucose binding	MOLECULAR_FUNCTION	0.14781250123524647	0.0011962137225629227
GO:0004620	phospholipase activity	MOLECULAR_FUNCTION	0.14781250123524647	0.001109992888861318
GO:0003785	actin monomer binding	MOLECULAR_FUNCTION	0.14781250123524647	0.0011962137225629227
GO:0004857	enzyme inhibitor activity	MOLECULAR_FUNCTION	0.15683856472195135	0.001427313834113121
GO:0032561	guanyl ribonucleotide binding	MOLECULAR_FUNCTION	0.15683856472195135	0.0014312370130558155
GO:0019001	guanyl nucleotide binding	MOLECULAR_FUNCTION	0.15843935095128275	0.0014715949043466983
GO:0009055	electron transfer activity	MOLECULAR_FUNCTION	0.17812153468801173	0.0018306102617001293
GO:0015399	primary active transmembrane transporter activity	MOLECULAR_FUNCTION	0.19058065208504885	0.0021443911415611945
GO:0003746	translation elongation factor activity	MOLECULAR_FUNCTION	0.2136384179524035	0.0024795457386165374
GO:0030414	peptidase inhibitor activity	MOLECULAR_FUNCTION	0.25338219228694464	0.003149471078255767
GO:0051015	actin filament binding	MOLECULAR_FUNCTION	0.2820949409543178	0.003823914766192135
GO:0017134	fibroblast growth factor binding	MOLECULAR_FUNCTION	0.28505659999968774	0.004069613215934254
GO:0032440	2-alkenal reductase [NAD(P)+] activity	MOLECULAR_FUNCTION	0.28505659999968774	0.004069613215934254
GO:0005488	binding	MOLECULAR_FUNCTION	0.3056171162120931	0.004711382849375759
GO:0005515	protein binding	MOLECULAR_FUNCTION	0.30858688911312326	0.004829549472053938
GO:0015078	proton transmembrane transporter activity	MOLECULAR_FUNCTION	0.30858688911312326	0.004893864902210425
GO:0008289	lipid binding	MOLECULAR_FUNCTION	0.3161135714645027	0.0050412370748303785
GO:0050661	NADP binding	MOLECULAR_FUNCTION	0.3210038839689117	0.005248727164308839
GO:0016651	oxidoreductase activity, acting on NAD(P)H	MOLECULAR_FUNCTION	0.3210038839689117	0.005201771161520197
GO:0016298	lipase activity	MOLECULAR_FUNCTION	0.32410708782355313	0.005455864861032612
GO:0051287	NAD binding	MOLECULAR_FUNCTION	0.3304439277159334	0.005591812722046893
GO:0016491	oxidoreductase activity	MOLECULAR_FUNCTION	0.3713953161160935	0.006449320630703847
GO:0098772	molecular function regulator	MOLECULAR_FUNCTION	0.40821826233126096	0.007717262813689974
GO:0097159	organic cyclic compound binding	MOLECULAR_FUNCTION	0.40821826233126096	0.009086643390067085

## Sheet: Cluster 1
Supplementary Table 3. Each sheet of the table represents the blast2GO enrichment list of the total marker genes defined for each of the transcriptomic clusters.
GO ID	GO Name	GO Category	FDR	P-value
GO:0005737	cytoplasm	CELLULAR_COMPONENT	2.590483789016923E-4	2.295103915138587E-8
GO:0005622	intracellular anatomical structure	CELLULAR_COMPONENT	2.9509827775572655E-4	5.228994024199992E-8
GO:0038093	Fc receptor signaling pathway	BIOLOGICAL_PROCESS	4.202211136943158E-4	1.2389756777972806E-7
GO:0043231	intracellular membrane-bounded organelle	CELLULAR_COMPONENT	4.202211136943158E-4	1.4892216308826644E-7
GO:0002757	immune response-activating signal transduction	BIOLOGICAL_PROCESS	5.174914952762777E-4	2.750907213305277E-7
GO:0002429	immune response-activating cell surface receptor signaling pathway	BIOLOGICAL_PROCESS	5.174914952762777E-4	2.750907213305277E-7
GO:0002253	activation of immune response	BIOLOGICAL_PROCESS	6.238453006349344E-4	4.421690799219877E-7
GO:0043227	membrane-bounded organelle	CELLULAR_COMPONENT	6.238453006349344E-4	3.9793256407645304E-7
GO:0043226	organelle	CELLULAR_COMPONENT	8.531165800629598E-4	7.558399752484804E-7
GO:0002768	immune response-regulating cell surface receptor signaling pathway	BIOLOGICAL_PROCESS	8.531165800629598E-4	6.845472518920871E-7
GO:0065003	protein-containing complex assembly	BIOLOGICAL_PROCESS	8.549068240124684E-4	8.331686953253436E-7
GO:0050778	positive regulation of immune response	BIOLOGICAL_PROCESS	0.0012061462010507945	1.4960615588474461E-6
GO:0002684	positive regulation of immune system process	BIOLOGICAL_PROCESS	0.0012061462010507945	1.3233043531592728E-6
GO:0043229	intracellular organelle	CELLULAR_COMPONENT	0.0012061462010507945	1.4760555010218759E-6
GO:0044085	cellular component biogenesis	BIOLOGICAL_PROCESS	0.0013768938556441143	1.8298403326536469E-6
GO:0030163	protein catabolic process	BIOLOGICAL_PROCESS	0.0017301037389183265	2.714553377845874E-6
GO:0005740	mitochondrial envelope	CELLULAR_COMPONENT	0.0017301037389183265	2.7590916364427993E-6
GO:0002764	immune response-regulating signaling pathway	BIOLOGICAL_PROCESS	0.0017301037389183265	2.517702127167716E-6
GO:0043933	protein-containing complex organization	BIOLOGICAL_PROCESS	0.002037027289603408	3.4290350405302335E-6
GO:0044257	cellular protein catabolic process	BIOLOGICAL_PROCESS	0.0022589405310709026	4.002729744078856E-6
GO:0050776	regulation of immune response	BIOLOGICAL_PROCESS	0.003647157085201269	6.785709115728417E-6
GO:0031967	organelle envelope	CELLULAR_COMPONENT	0.00430160468299848	8.384451406570973E-6
GO:0065004	protein-DNA complex assembly	BIOLOGICAL_PROCESS	0.004593956416759224	9.36130039740074E-6
GO:0031975	envelope	CELLULAR_COMPONENT	0.004789957770883577	1.0185078984779466E-5
GO:0022607	cellular component assembly	BIOLOGICAL_PROCESS	0.004950014522556194	1.0963972983423836E-5
GO:0071824	protein-DNA complex subunit organization	BIOLOGICAL_PROCESS	0.005906901309797781	1.360675414678323E-5
GO:1990840	response to lectin	BIOLOGICAL_PROCESS	0.006582155464615745	2.1315798893547743E-5
GO:1990858	cellular response to lectin	BIOLOGICAL_PROCESS	0.006582155464615745	2.1315798893547743E-5
GO:0072593	reactive oxygen species metabolic process	BIOLOGICAL_PROCESS	0.006582155464615745	2.1703922620307893E-5
GO:0005739	mitochondrion	CELLULAR_COMPONENT	0.006582155464615745	2.3374218190958723E-5
GO:1902745	positive regulation of lamellipodium organization	BIOLOGICAL_PROCESS	0.006582155464615745	2.3909663688247146E-5
GO:0002220	innate immune response activating cell surface receptor signaling pathway	BIOLOGICAL_PROCESS	0.006582155464615745	2.1315798893547743E-5
GO:0002223	stimulatory C-type lectin receptor signaling pathway	BIOLOGICAL_PROCESS	0.006582155464615745	2.1315798893547743E-5
GO:0002218	activation of innate immune response	BIOLOGICAL_PROCESS	0.006582155464615745	2.1315798893547743E-5
GO:0032103	positive regulation of response to external stimulus	BIOLOGICAL_PROCESS	0.006582155464615745	1.847303101309905E-5
GO:0038094	Fc-gamma receptor signaling pathway	BIOLOGICAL_PROCESS	0.006582155464615745	2.3909663688247146E-5
GO:0038096	Fc-gamma receptor signaling pathway involved in phagocytosis	BIOLOGICAL_PROCESS	0.006582155464615745	2.3909663688247146E-5
GO:0051603	proteolysis involved in cellular protein catabolic process	BIOLOGICAL_PROCESS	0.006582155464615745	1.7353319610623423E-5
GO:0002682	regulation of immune system process	BIOLOGICAL_PROCESS	0.006582155464615745	1.8938847748078077E-5
GO:0002758	innate immune response-activating signal transduction	BIOLOGICAL_PROCESS	0.006582155464615745	2.1315798893547743E-5
GO:0002433	immune response-regulating cell surface receptor signaling pathway involved in phagocytosis	BIOLOGICAL_PROCESS	0.006582155464615745	2.3909663688247146E-5
GO:0070062	extracellular exosome	CELLULAR_COMPONENT	0.008209132437256161	3.1274270825021256E-5
GO:0022603	regulation of anatomical structure morphogenesis	BIOLOGICAL_PROCESS	0.008209132437256161	3.1021238423154876E-5
GO:0065010	extracellular membrane-bounded organelle	CELLULAR_COMPONENT	0.008311566639889271	3.5346433836686895E-5
GO:1903561	extracellular vesicle	CELLULAR_COMPONENT	0.008311566639889271	3.428704498386947E-5
GO:0022407	regulation of cell-cell adhesion	BIOLOGICAL_PROCESS	0.008311566639889271	3.523974977343147E-5
GO:0038095	Fc-epsilon receptor signaling pathway	BIOLOGICAL_PROCESS	0.008311566639889271	3.523974977343147E-5
GO:0043230	extracellular organelle	CELLULAR_COMPONENT	0.008311566639889271	3.5346433836686895E-5
GO:0005743	mitochondrial inner membrane	CELLULAR_COMPONENT	0.008388045715817711	3.641483477231043E-5
GO:0097581	lamellipodium organization	BIOLOGICAL_PROCESS	0.00851864918526786	4.151020689197592E-5
GO:0019866	organelle inner membrane	CELLULAR_COMPONENT	0.00851864918526786	4.117189083140576E-5
GO:1902743	regulation of lamellipodium organization	BIOLOGICAL_PROCESS	0.00851864918526786	4.151020689197592E-5
GO:0005615	extracellular space	CELLULAR_COMPONENT	0.00851864918526786	4.122057666683897E-5
GO:0031966	mitochondrial membrane	CELLULAR_COMPONENT	0.00851864918526786	3.979496468734456E-5
GO:0002431	Fc receptor mediated stimulatory signaling pathway	BIOLOGICAL_PROCESS	0.00851864918526786	4.151020689197592E-5
GO:0050793	regulation of developmental process	BIOLOGICAL_PROCESS	0.008764782770029322	4.3745190353813985E-5
GO:0045089	positive regulation of innate immune response	BIOLOGICAL_PROCESS	0.008764782770029322	4.426265773825387E-5
GO:0044265	cellular macromolecule catabolic process	BIOLOGICAL_PROCESS	0.00926844490432934	4.762734158333496E-5
GO:0050870	positive regulation of T cell activation	BIOLOGICAL_PROCESS	0.012395020363746019	6.58900701536955E-5
GO:1903039	positive regulation of leukocyte cell-cell adhesion	BIOLOGICAL_PROCESS	0.012395020363746019	6.58900701536955E-5
GO:0031349	positive regulation of defense response	BIOLOGICAL_PROCESS	0.014828215826740394	8.14520582314082E-5
GO:0002833	positive regulation of response to biotic stimulus	BIOLOGICAL_PROCESS	0.014828215826740394	8.14520582314082E-5
GO:0003723	RNA binding	MOLECULAR_FUNCTION	0.01632451375792645	9.111760137763502E-5
GO:1903037	regulation of leukocyte cell-cell adhesion	BIOLOGICAL_PROCESS	0.016768438370148617	9.805235513686619E-5
GO:0007159	leukocyte cell-cell adhesion	BIOLOGICAL_PROCESS	0.016768438370148617	9.805235513686619E-5
GO:0032268	regulation of cellular protein metabolic process	BIOLOGICAL_PROCESS	0.016768438370148617	9.714381125848075E-5
GO:0044087	regulation of cellular component biogenesis	BIOLOGICAL_PROCESS	0.018402866616090384	1.0924001623797782E-4
GO:0051270	regulation of cellular component movement	BIOLOGICAL_PROCESS	0.019019044368892884	1.1458270728136051E-4
GO:0031344	regulation of cell projection organization	BIOLOGICAL_PROCESS	0.019235417515087068	1.1759048538504543E-4
GO:0040012	regulation of locomotion	BIOLOGICAL_PROCESS	0.01997704230626672	1.2389412256920976E-4
GO:0050865	regulation of cell activation	BIOLOGICAL_PROCESS	0.02063827702808623	1.3734816632915336E-4
GO:0050863	regulation of T cell activation	BIOLOGICAL_PROCESS	0.02063827702808623	1.389659833555908E-4
GO:0022409	positive regulation of cell-cell adhesion	BIOLOGICAL_PROCESS	0.02063827702808623	1.389659833555908E-4
GO:1901888	regulation of cell junction assembly	BIOLOGICAL_PROCESS	0.02063827702808623	1.389659833555908E-4
GO:0022604	regulation of cell morphogenesis	BIOLOGICAL_PROCESS	0.02063827702808623	1.3734816632915336E-4
GO:0002694	regulation of leukocyte activation	BIOLOGICAL_PROCESS	0.02063827702808623	1.3734816632915336E-4
GO:1902494	catalytic complex	CELLULAR_COMPONENT	0.020841434350820653	1.4218042394021355E-4
GO:0050790	regulation of catalytic activity	BIOLOGICAL_PROCESS	0.022779497105220824	1.5742010934767647E-4
GO:0006909	phagocytosis	BIOLOGICAL_PROCESS	0.02299723039367713	1.6096227528134075E-4
GO:0051246	regulation of protein metabolic process	BIOLOGICAL_PROCESS	0.02611771177852994	1.851171207834141E-4
GO:0048010	vascular endothelial growth factor receptor signaling pathway	BIOLOGICAL_PROCESS	0.026415263255077898	1.8956643250299547E-4
GO:0007417	central nervous system development	BIOLOGICAL_PROCESS	0.02649857948363394	1.9251205082466402E-4
GO:0065009	regulation of molecular function	BIOLOGICAL_PROCESS	0.028106111691658425	2.0668089575685738E-4
GO:1901565	organonitrogen compound catabolic process	BIOLOGICAL_PROCESS	0.02834497483638771	2.121301805272446E-4
GO:0071840	cellular component organization or biogenesis	BIOLOGICAL_PROCESS	0.02834497483638771	2.1345998592123288E-4
GO:0044267	cellular protein metabolic process	BIOLOGICAL_PROCESS	0.028440140825940763	2.1669638619924741E-4
GO:0009057	macromolecule catabolic process	BIOLOGICAL_PROCESS	0.030096139359701214	2.3198051956179724E-4
GO:0044089	positive regulation of cellular component biogenesis	BIOLOGICAL_PROCESS	0.030191132712076078	2.3538758559960086E-4
GO:0060071	Wnt signaling pathway, planar cell polarity pathway	BIOLOGICAL_PROCESS	0.030433206047147447	2.507564598551176E-4
GO:0090175	regulation of establishment of planar polarity	BIOLOGICAL_PROCESS	0.030433206047147447	2.507564598551176E-4
GO:0002252	immune effector process	BIOLOGICAL_PROCESS	0.030433206047147447	2.4935820176012123E-4
GO:0045259	proton-transporting ATP synthase complex	CELLULAR_COMPONENT	0.030433206047147447	2.507564598551176E-4
GO:0019221	cytokine-mediated signaling pathway	BIOLOGICAL_PROCESS	0.030433206047147447	2.4935820176012123E-4
GO:0098798	mitochondrial protein-containing complex	CELLULAR_COMPONENT	0.03344528785872373	2.8150104957727954E-4
GO:0034097	response to cytokine	BIOLOGICAL_PROCESS	0.03344528785872373	2.8150104957727954E-4
GO:0005773	vacuole	CELLULAR_COMPONENT	0.033781593971151144	2.87324623126651E-4
GO:0032991	protein-containing complex	CELLULAR_COMPONENT	0.03379559883356112	2.9043794514533786E-4
GO:0050867	positive regulation of cell activation	BIOLOGICAL_PROCESS	0.03525547376889709	3.2340681279751954E-4
GO:0030027	lamellipodium	CELLULAR_COMPONENT	0.03525547376889709	3.2340681279751954E-4
GO:0000902	cell morphogenesis	BIOLOGICAL_PROCESS	0.03525547376889709	3.184141032068171E-4
GO:0045088	regulation of innate immune response	BIOLOGICAL_PROCESS	0.03525547376889709	3.248488767578007E-4
GO:0051251	positive regulation of lymphocyte activation	BIOLOGICAL_PROCESS	0.03525547376889709	3.2340681279751954E-4
GO:0051668	localization within membrane	BIOLOGICAL_PROCESS	0.03525547376889709	3.090384211192959E-4
GO:0002696	positive regulation of leukocyte activation	BIOLOGICAL_PROCESS	0.03525547376889709	3.2340681279751954E-4
GO:0032101	regulation of response to external stimulus	BIOLOGICAL_PROCESS	0.03539665975103749	3.2928583980321933E-4
GO:0031295	T cell costimulation	BIOLOGICAL_PROCESS	0.0361515554749896	3.427143116704073E-4
GO:0031294	lymphocyte costimulation	BIOLOGICAL_PROCESS	0.0361515554749896	3.427143116704073E-4
GO:0031347	regulation of defense response	BIOLOGICAL_PROCESS	0.03795068374193837	3.631322622600642E-4
GO:0042221	response to chemical	BIOLOGICAL_PROCESS	0.04070755959212177	3.963735411843244E-4
GO:0003676	nucleic acid binding	MOLECULAR_FUNCTION	0.04070755959212177	3.96724688148613E-4
GO:0098800	inner mitochondrial membrane protein complex	CELLULAR_COMPONENT	0.0422436550405679	4.1543773451785566E-4
GO:0000502	proteasome complex	CELLULAR_COMPONENT	0.043003975964080045	4.2672502064117706E-4
GO:0005764	lysosome	CELLULAR_COMPONENT	0.044219911458296936	4.466261988345752E-4
GO:0015980	energy derivation by oxidation of organic compounds	BIOLOGICAL_PROCESS	0.044219911458296936	4.466261988345752E-4
GO:0031399	regulation of protein modification process	BIOLOGICAL_PROCESS	0.044365297836922765	4.5595592709161346E-4
GO:0007399	nervous system development	BIOLOGICAL_PROCESS	0.044365297836922765	4.5249037318081107E-4
GO:1905369	endopeptidase complex	CELLULAR_COMPONENT	0.044521224690164826	4.615029050012656E-4
GO:0006952	defense response	BIOLOGICAL_PROCESS	0.044660043215704305	4.7085542151757E-4
GO:0022900	electron transport chain	BIOLOGICAL_PROCESS	0.044660043215704305	4.668998718159523E-4
GO:0048584	positive regulation of response to stimulus	BIOLOGICAL_PROCESS	0.04565665161629037	4.934979620082773E-4
GO:0006955	immune response	BIOLOGICAL_PROCESS	0.04565665161629037	4.934193289252861E-4
GO:0010467	gene expression	BIOLOGICAL_PROCESS	0.04565665161629037	4.8799206466393114E-4
GO:0061572	actin filament bundle organization	BIOLOGICAL_PROCESS	0.04572730400691769	5.064156109563844E-4
GO:0000323	lytic vacuole	CELLULAR_COMPONENT	0.04572730400691769	5.017762644521952E-4
GO:0051017	actin filament bundle assembly	BIOLOGICAL_PROCESS	0.04572730400691769	5.064156109563844E-4
GO:0031090	organelle membrane	CELLULAR_COMPONENT	0.04632186848248597	5.171042286518324E-4
GO:1990904	ribonucleoprotein complex	CELLULAR_COMPONENT	0.04787431520390032	5.38676178869083E-4
GO:0030334	regulation of cell migration	BIOLOGICAL_PROCESS	0.05103085141444135	5.787143599759451E-4
GO:0050852	T cell receptor signaling pathway	BIOLOGICAL_PROCESS	0.053688067308778654	6.183617214619673E-4
GO:0050900	leukocyte migration	BIOLOGICAL_PROCESS	0.053688067308778654	6.183617214619673E-4
GO:0070469	respirasome	CELLULAR_COMPONENT	0.05586828838449085	6.484225904463809E-4
GO:0060263	regulation of respiratory burst	BIOLOGICAL_PROCESS	0.057325317218441606	6.805699040729312E-4
GO:0005786	signal recognition particle, endoplasmic reticulum targeting	CELLULAR_COMPONENT	0.057325317218441606	6.805699040729312E-4
GO:0010592	positive regulation of lamellipodium assembly	BIOLOGICAL_PROCESS	0.057325317218441606	6.805699040729312E-4
GO:0072657	protein localization to membrane	BIOLOGICAL_PROCESS	0.059502426733469796	7.169602228893321E-4
GO:0045333	cellular respiration	BIOLOGICAL_PROCESS	0.059502426733469796	7.169602228893321E-4
GO:0050851	antigen receptor-mediated signaling pathway	BIOLOGICAL_PROCESS	0.06049059146731875	7.449448227126169E-4
GO:0120032	regulation of plasma membrane bounded cell projection assembly	BIOLOGICAL_PROCESS	0.06049059146731875	7.449448227126169E-4
GO:0060491	regulation of cell projection assembly	BIOLOGICAL_PROCESS	0.06049059146731875	7.449448227126169E-4
GO:2000145	regulation of cell motility	BIOLOGICAL_PROCESS	0.0619259482516057	7.681078014729157E-4
GO:0001736	establishment of planar polarity	BIOLOGICAL_PROCESS	0.06618723606659542	8.86885837334939E-4
GO:2000027	regulation of animal organ morphogenesis	BIOLOGICAL_PROCESS	0.06618723606659542	8.86885837334939E-4
GO:0070013	intracellular organelle lumen	CELLULAR_COMPONENT	0.06618723606659542	8.913316100046516E-4
GO:0005839	proteasome core complex	CELLULAR_COMPONENT	0.06618723606659542	8.86885837334939E-4
GO:0004298	threonine-type endopeptidase activity	MOLECULAR_FUNCTION	0.06618723606659542	8.86885837334939E-4
GO:0031974	membrane-enclosed lumen	CELLULAR_COMPONENT	0.06618723606659542	8.913316100046516E-4
GO:0007164	establishment of tissue polarity	BIOLOGICAL_PROCESS	0.06618723606659542	8.86885837334939E-4
GO:1905368	peptidase complex	CELLULAR_COMPONENT	0.06618723606659542	8.78517378139144E-4
GO:0015986	ATP synthesis coupled proton transport	BIOLOGICAL_PROCESS	0.06618723606659542	8.86885837334939E-4
GO:0015985	energy coupled proton transport, down electrochemical gradient	BIOLOGICAL_PROCESS	0.06618723606659542	8.86885837334939E-4
GO:0043233	organelle lumen	CELLULAR_COMPONENT	0.06618723606659542	8.913316100046516E-4
GO:0007596	blood coagulation	BIOLOGICAL_PROCESS	0.06618723606659542	8.86885837334939E-4
GO:0001932	regulation of protein phosphorylation	BIOLOGICAL_PROCESS	0.06685995090282676	9.063145643778234E-4
GO:0016032	viral process	BIOLOGICAL_PROCESS	0.06874475172917394	9.379544401783278E-4
GO:0042110	T cell activation	BIOLOGICAL_PROCESS	0.075599579573658	0.001044877683484597
GO:0070003	threonine-type peptidase activity	MOLECULAR_FUNCTION	0.075599579573658	0.001044877683484597
GO:0004197	cysteine-type endopeptidase activity	MOLECULAR_FUNCTION	0.07696066084047569	0.001152330263315353
GO:1903649	regulation of cytoplasmic transport	BIOLOGICAL_PROCESS	0.07696066084047569	0.0011262495673675854
GO:0030032	lamellipodium assembly	BIOLOGICAL_PROCESS	0.07696066084047569	0.0011262495673675854
GO:0120035	regulation of plasma membrane bounded cell projection organization	BIOLOGICAL_PROCESS	0.07696066084047569	0.001152330263315353
GO:0031529	ruffle organization	BIOLOGICAL_PROCESS	0.07696066084047569	0.0011262495673675854
GO:0090150	establishment of protein localization to membrane	BIOLOGICAL_PROCESS	0.07696066084047569	0.001152330263315353
GO:0031981	nuclear lumen	CELLULAR_COMPONENT	0.07696066084047569	0.0011460761657607575
GO:1901890	positive regulation of cell junction assembly	BIOLOGICAL_PROCESS	0.07696066084047569	0.0011262495673675854
GO:0010591	regulation of lamellipodium assembly	BIOLOGICAL_PROCESS	0.07696066084047569	0.0011262495673675854
GO:0071526	semaphorin-plexin signaling pathway	BIOLOGICAL_PROCESS	0.07696066084047569	0.0011262495673675854
GO:0043114	regulation of vascular permeability	BIOLOGICAL_PROCESS	0.07696066084047569	0.0011262495673675854
GO:0045730	respiratory burst	BIOLOGICAL_PROCESS	0.07696066084047569	0.0011262495673675854
GO:2000641	regulation of early endosome to late endosome transport	BIOLOGICAL_PROCESS	0.07696066084047569	0.0011262495673675854
GO:0016043	cellular component organization	BIOLOGICAL_PROCESS	0.07821287542345276	0.0011801754433410933
GO:0001738	morphogenesis of a polarized epithelium	BIOLOGICAL_PROCESS	0.07821287542345276	0.00121958590188072
GO:0065002	intracellular protein transmembrane transport	BIOLOGICAL_PROCESS	0.07821287542345276	0.00121958590188072
GO:0031346	positive regulation of cell projection organization	BIOLOGICAL_PROCESS	0.07821287542345276	0.00121958590188072
GO:0005746	mitochondrial respirasome	CELLULAR_COMPONENT	0.07821287542345276	0.00121958590188072
GO:0046661	male sex differentiation	BIOLOGICAL_PROCESS	0.07821287542345276	0.00121958590188072
GO:0007599	hemostasis	BIOLOGICAL_PROCESS	0.07821287542345276	0.00121958590188072
GO:0002831	regulation of response to biotic stimulus	BIOLOGICAL_PROCESS	0.08724681091045632	0.0013681833552893388
GO:0051249	regulation of lymphocyte activation	BIOLOGICAL_PROCESS	0.08901276713194631	0.00141164927054296
GO:0045785	positive regulation of cell adhesion	BIOLOGICAL_PROCESS	0.08901276713194631	0.00141164927054296
GO:0015078	proton transmembrane transporter activity	MOLECULAR_FUNCTION	0.08938952766631046	0.00144138336451391
GO:1902600	proton transmembrane transport	BIOLOGICAL_PROCESS	0.08938952766631046	0.00144138336451391
GO:0044237	cellular metabolic process	BIOLOGICAL_PROCESS	0.08938952766631046	0.001432124535031774
GO:0030155	regulation of cell adhesion	BIOLOGICAL_PROCESS	0.0911566595711633	0.0014860304209350621
GO:0034330	cell junction organization	BIOLOGICAL_PROCESS	0.0911566595711633	0.0014860304209350621
GO:0042325	regulation of phosphorylation	BIOLOGICAL_PROCESS	0.09633635147336045	0.0015942502314840873
GO:0006754	ATP biosynthetic process	BIOLOGICAL_PROCESS	0.09633635147336045	0.0016216804093150071
GO:0050817	coagulation	BIOLOGICAL_PROCESS	0.09633635147336045	0.0016216804093150071
GO:0071345	cellular response to cytokine stimulus	BIOLOGICAL_PROCESS	0.09633635147336045	0.0016107687748754492
GO:0071806	protein transmembrane transport	BIOLOGICAL_PROCESS	0.09633635147336045	0.0016216804093150071
GO:0044260	cellular macromolecule metabolic process	BIOLOGICAL_PROCESS	0.09633635147336045	0.001597251414615097
GO:0120034	positive regulation of plasma membrane bounded cell projection assembly	BIOLOGICAL_PROCESS	0.09759295934662506	0.0016774195192030886
GO:0031982	vesicle	CELLULAR_COMPONENT	0.09759295934662506	0.0016551294661210046
GO:0034103	regulation of tissue remodeling	BIOLOGICAL_PROCESS	0.09759295934662506	0.0016774195192030886
GO:0008312	7S RNA binding	MOLECULAR_FUNCTION	0.09759295934662506	0.0016774195192030886
GO:0051241	negative regulation of multicellular organismal process	BIOLOGICAL_PROCESS	0.09891998318463925	0.0017089923558965762
GO:0045321	leukocyte activation	BIOLOGICAL_PROCESS	0.10035096722304694	0.0017426056149302028
GO:0043254	regulation of protein-containing complex assembly	BIOLOGICAL_PROCESS	0.10781360539078957	0.0018817471659418397
GO:0007420	brain development	BIOLOGICAL_PROCESS	0.10800379519088774	0.001894635549552208
GO:0060322	head development	BIOLOGICAL_PROCESS	0.11684052233190999	0.002060003893333046
GO:0044877	protein-containing complex binding	MOLECULAR_FUNCTION	0.11717510936907792	0.002076284386800353
GO:0032990	cell part morphogenesis	BIOLOGICAL_PROCESS	0.11963107943390304	0.00223353355677794
GO:0048500	signal recognition particle	CELLULAR_COMPONENT	0.11963107943390304	0.002331783244038156
GO:0150116	regulation of cell-substrate junction organization	BIOLOGICAL_PROCESS	0.11963107943390304	0.002331783244038156
GO:0051893	regulation of focal adhesion assembly	BIOLOGICAL_PROCESS	0.11963107943390304	0.002331783244038156
GO:0019773	proteasome core complex, alpha-subunit complex	CELLULAR_COMPONENT	0.11963107943390304	0.002331783244038156
GO:0070911	global genome nucleotide-excision repair	BIOLOGICAL_PROCESS	0.11963107943390304	0.002331783244038156
GO:0120039	plasma membrane bounded cell projection morphogenesis	BIOLOGICAL_PROCESS	0.11963107943390304	0.00223353355677794
GO:0030168	platelet activation	BIOLOGICAL_PROCESS	0.11963107943390304	0.002331783244038156
GO:0035556	intracellular signal transduction	BIOLOGICAL_PROCESS	0.11963107943390304	0.0021956163805046266
GO:0048858	cell projection morphogenesis	BIOLOGICAL_PROCESS	0.11963107943390304	0.00223353355677794
GO:0045022	early endosome to late endosome transport	BIOLOGICAL_PROCESS	0.11963107943390304	0.002331783244038156
GO:0005829	cytosol	CELLULAR_COMPONENT	0.11963107943390304	0.0022801104176914506
GO:0071013	catalytic step 2 spliceosome	CELLULAR_COMPONENT	0.11963107943390304	0.0021827636406153124
GO:0098927	vesicle-mediated transport between endosomal compartments	BIOLOGICAL_PROCESS	0.11963107943390304	0.002331783244038156
GO:0090109	regulation of cell-substrate junction assembly	BIOLOGICAL_PROCESS	0.11963107943390304	0.002331783244038156
GO:0048771	tissue remodeling	BIOLOGICAL_PROCESS	0.11963107943390304	0.002331783244038156
GO:0045261	proton-transporting ATP synthase complex, catalytic core F(1)	CELLULAR_COMPONENT	0.11963107943390304	0.002331783244038156
GO:0048041	focal adhesion assembly	BIOLOGICAL_PROCESS	0.11963107943390304	0.002331783244038156
GO:0032231	regulation of actin filament bundle assembly	BIOLOGICAL_PROCESS	0.11963107943390304	0.002331783244038156
GO:0051591	response to cAMP	BIOLOGICAL_PROCESS	0.11963107943390304	0.002331783244038156
GO:0035567	non-canonical Wnt signaling pathway	BIOLOGICAL_PROCESS	0.12025874735731479	0.002365326651308929
GO:0110053	regulation of actin filament organization	BIOLOGICAL_PROCESS	0.12025874735731479	0.002365326651308929
GO:0030030	cell projection organization	BIOLOGICAL_PROCESS	0.12764657872003768	0.002521944454201152
GO:0042060	wound healing	BIOLOGICAL_PROCESS	0.13367297089753025	0.0026528524391819597
GO:0045087	innate immune response	BIOLOGICAL_PROCESS	0.13515099051667004	0.002694159020665435
GO:0044419	biological process involved in interspecies interaction between organisms	BIOLOGICAL_PROCESS	0.13613213706586014	0.00272577859279564
GO:0001775	cell activation	BIOLOGICAL_PROCESS	0.14326976782900666	0.0028813889693616117
GO:0040011	locomotion	BIOLOGICAL_PROCESS	0.14349625564239213	0.0028986574188416235
GO:0006612	protein targeting to membrane	BIOLOGICAL_PROCESS	0.14405700810662475	0.0029610371117867406
GO:0009206	purine ribonucleoside triphosphate biosynthetic process	BIOLOGICAL_PROCESS	0.14405700810662475	0.0029610371117867406
GO:0009145	purine nucleoside triphosphate biosynthetic process	BIOLOGICAL_PROCESS	0.14405700810662475	0.0029610371117867406
GO:0051171	regulation of nitrogen compound metabolic process	BIOLOGICAL_PROCESS	0.14405700810662475	0.0029301062722880797
GO:0050885	neuromuscular process controlling balance	BIOLOGICAL_PROCESS	0.1451828453887506	0.0030870809686630763
GO:0065008	regulation of biological quality	BIOLOGICAL_PROCESS	0.1451828453887506	0.0030025989540829663
GO:0061650	ubiquitin-like protein conjugating enzyme activity	MOLECULAR_FUNCTION	0.1451828453887506	0.0030870809686630763
GO:0046794	transport of virus	BIOLOGICAL_PROCESS	0.1451828453887506	0.0030870809686630763
GO:0038128	ERBB2 signaling pathway	BIOLOGICAL_PROCESS	0.1451828453887506	0.0030870809686630763
GO:0002685	regulation of leukocyte migration	BIOLOGICAL_PROCESS	0.1451828453887506	0.0030870809686630763
GO:0075733	intracellular transport of virus	BIOLOGICAL_PROCESS	0.1451828453887506	0.0030870809686630763
GO:0044248	cellular catabolic process	BIOLOGICAL_PROCESS	0.1451828453887506	0.0030315456943474325
GO:0048870	cell motility	BIOLOGICAL_PROCESS	0.14802409107012632	0.0031737246424178764
GO:0051674	localization of cell	BIOLOGICAL_PROCESS	0.14802409107012632	0.0031737246424178764
GO:0034329	cell junction assembly	BIOLOGICAL_PROCESS	0.15103710084682684	0.0032903484254424064
GO:0009967	positive regulation of signal transduction	BIOLOGICAL_PROCESS	0.15103710084682684	0.003291851405007478
GO:0051493	regulation of cytoskeleton organization	BIOLOGICAL_PROCESS	0.15103710084682684	0.0032821745085503625
GO:0022904	respiratory electron transport chain	BIOLOGICAL_PROCESS	0.15103710084682684	0.0032903484254424064
GO:0010033	response to organic substance	BIOLOGICAL_PROCESS	0.15135593862148355	0.003312210227651851
GO:0016477	cell migration	BIOLOGICAL_PROCESS	0.15417328255601515	0.003414841910073871
GO:0051239	regulation of multicellular organismal process	BIOLOGICAL_PROCESS	0.15417328255601515	0.0034071552503033603
GO:0022613	ribonucleoprotein complex biogenesis	BIOLOGICAL_PROCESS	0.15417328255601515	0.0034071552503033603
GO:0051338	regulation of transferase activity	BIOLOGICAL_PROCESS	0.15555773095725303	0.003459288603727342
GO:0060627	regulation of vesicle-mediated transport	BIOLOGICAL_PROCESS	0.15597100518399018	0.0034961162675245425
GO:0005634	nucleus	CELLULAR_COMPONENT	0.15597100518399018	0.003487498660090886
GO:0048518	positive regulation of biological process	BIOLOGICAL_PROCESS	0.1572890580967509	0.0035395960624235606
GO:0050878	regulation of body fluid levels	BIOLOGICAL_PROCESS	0.1599166715940839	0.003641231912791669
GO:0016469	proton-transporting two-sector ATPase complex	CELLULAR_COMPONENT	0.1599166715940839	0.003641231912791669
GO:0009205	purine ribonucleoside triphosphate metabolic process	BIOLOGICAL_PROCESS	0.1599166715940839	0.003641231912791669
GO:0006468	protein phosphorylation	BIOLOGICAL_PROCESS	0.1638978433607659	0.0037464023732681493
GO:0032989	cellular component morphogenesis	BIOLOGICAL_PROCESS	0.16501271049097196	0.00378650589325434
GO:0031595	nuclear proteasome complex	CELLULAR_COMPONENT	0.16536458427044037	0.003941089144037252
GO:0150115	cell-substrate junction organization	BIOLOGICAL_PROCESS	0.16536458427044037	0.003941089144037252
GO:0030038	contractile actin filament bundle assembly	BIOLOGICAL_PROCESS	0.16536458427044037	0.003941089144037252
GO:0042743	hydrogen peroxide metabolic process	BIOLOGICAL_PROCESS	0.16536458427044037	0.003941089144037252
GO:0001952	regulation of cell-matrix adhesion	BIOLOGICAL_PROCESS	0.16536458427044037	0.003941089144037252
GO:0007044	cell-substrate junction assembly	BIOLOGICAL_PROCESS	0.16536458427044037	0.003941089144037252
GO:0014074	response to purine-containing compound	BIOLOGICAL_PROCESS	0.16536458427044037	0.003941089144037252
GO:0051128	regulation of cellular component organization	BIOLOGICAL_PROCESS	0.16536458427044037	0.0038713056619245857
GO:0043149	stress fiber assembly	BIOLOGICAL_PROCESS	0.16536458427044037	0.003941089144037252
GO:0070851	growth factor receptor binding	MOLECULAR_FUNCTION	0.16536458427044037	0.003941089144037252
GO:0051130	positive regulation of cellular component organization	BIOLOGICAL_PROCESS	0.16546616366491174	0.003958169946799519
GO:0030335	positive regulation of cell migration	BIOLOGICAL_PROCESS	0.16718551806349238	0.004014111402073752
GO:1901575	organic substance catabolic process	BIOLOGICAL_PROCESS	0.17215387222368714	0.004169767240164894
GO:0005515	protein binding	MOLECULAR_FUNCTION	0.17215387222368714	0.004159447377604342
GO:0005576	extracellular region	CELLULAR_COMPONENT	0.17215387222368714	0.004183191416715451
GO:0007265	Ras protein signal transduction	BIOLOGICAL_PROCESS	0.17215387222368714	0.004194410814345172
GO:2000147	positive regulation of cell motility	BIOLOGICAL_PROCESS	0.17967068456116603	0.004409389529852307
GO:0031252	cell leading edge	CELLULAR_COMPONENT	0.17967068456116603	0.004409389529852307
GO:0060255	regulation of macromolecule metabolic process	BIOLOGICAL_PROCESS	0.1801132898751169	0.00443620931915323
GO:0019222	regulation of metabolic process	BIOLOGICAL_PROCESS	0.18174662479457213	0.004492540827295616
GO:0048583	regulation of response to stimulus	BIOLOGICAL_PROCESS	0.1847109951480869	0.0045821811501253066
GO:0044238	primary metabolic process	BIOLOGICAL_PROCESS	0.18854718498739503	0.0046940514735056265
GO:2000377	regulation of reactive oxygen species metabolic process	BIOLOGICAL_PROCESS	0.19074552880012896	0.00489161993439451
GO:0003158	endothelium development	BIOLOGICAL_PROCESS	0.19074552880012896	0.00489161993439451
GO:1902903	regulation of supramolecular fiber organization	BIOLOGICAL_PROCESS	0.19074552880012896	0.004827448243428447
GO:0046034	ATP metabolic process	BIOLOGICAL_PROCESS	0.19074552880012896	0.0049008774122474875
GO:0040017	positive regulation of locomotion	BIOLOGICAL_PROCESS	0.19074552880012896	0.004827448243428447
GO:0007162	negative regulation of cell adhesion	BIOLOGICAL_PROCESS	0.19074552880012896	0.00489161993439451
GO:0048013	ephrin receptor signaling pathway	BIOLOGICAL_PROCESS	0.19074552880012896	0.00489161993439451
GO:0031167	rRNA methylation	BIOLOGICAL_PROCESS	0.19074552880012896	0.00489161993439451
GO:0046933	proton-transporting ATP synthase activity, rotational mechanism	MOLECULAR_FUNCTION	0.19074552880012896	0.00489161993439451
GO:0051174	regulation of phosphorus metabolic process	BIOLOGICAL_PROCESS	0.19276508150439658	0.005004001849985665
GO:0070887	cellular response to chemical stimulus	BIOLOGICAL_PROCESS	0.19276508150439658	0.0049809286726988046
GO:0019220	regulation of phosphate metabolic process	BIOLOGICAL_PROCESS	0.19276508150439658	0.005004001849985665
GO:0019538	protein metabolic process	BIOLOGICAL_PROCESS	0.19529121765714685	0.005086880303995851
GO:0030234	enzyme regulator activity	MOLECULAR_FUNCTION	0.19680839697152142	0.005178709479980673
GO:0010647	positive regulation of cell communication	BIOLOGICAL_PROCESS	0.19680839697152142	0.005171434254048879
GO:0043087	regulation of GTPase activity	BIOLOGICAL_PROCESS	0.19680839697152142	0.005171434254048879
GO:0032956	regulation of actin cytoskeleton organization	BIOLOGICAL_PROCESS	0.19691140590488054	0.005268649294167975
GO:0031497	chromatin assembly	BIOLOGICAL_PROCESS	0.19691140590488054	0.005268649294167975
GO:0044093	positive regulation of molecular function	BIOLOGICAL_PROCESS	0.19691140590488054	0.005228971282257884
GO:0051272	positive regulation of cellular component movement	BIOLOGICAL_PROCESS	0.19691140590488054	0.005268649294167975
GO:0045859	regulation of protein kinase activity	BIOLOGICAL_PROCESS	0.19691140590488054	0.005264093059908344
GO:0023056	positive regulation of signaling	BIOLOGICAL_PROCESS	0.19902900002386556	0.005342942057874658
GO:0007015	actin filament organization	BIOLOGICAL_PROCESS	0.20633885250413497	0.005557456468614958
GO:0009056	catabolic process	BIOLOGICAL_PROCESS	0.21064753249686063	0.0056921677515320715
GO:0032970	regulation of actin filament-based process	BIOLOGICAL_PROCESS	0.210788758993166	0.005733334722326743
GO:0042391	regulation of membrane potential	BIOLOGICAL_PROCESS	0.210788758993166	0.005733334722326743
GO:0061418	regulation of transcription from RNA polymerase II promoter in response to hypoxia	BIOLOGICAL_PROCESS	0.21137384631585124	0.005936520712512168
GO:0120036	plasma membrane bounded cell projection organization	BIOLOGICAL_PROCESS	0.21137384631585124	0.005819834389080973
GO:0015252	proton channel activity	MOLECULAR_FUNCTION	0.21137384631585124	0.005936520712512168
GO:0035666	TRIF-dependent toll-like receptor signaling pathway	BIOLOGICAL_PROCESS	0.21137384631585124	0.005936520712512168
GO:0046683	response to organophosphorus	BIOLOGICAL_PROCESS	0.21137384631585124	0.005936520712512168
GO:0004683	calmodulin-dependent protein kinase activity	MOLECULAR_FUNCTION	0.21137384631585124	0.005936520712512168
GO:0051129	negative regulation of cellular component organization	BIOLOGICAL_PROCESS	0.21137384631585124	0.005861542098511211
GO:0031234	extrinsic component of cytoplasmic side of plasma membrane	CELLULAR_COMPONENT	0.21137384631585124	0.005936520712512168
GO:0140102	catalytic activity, acting on a rRNA	MOLECULAR_FUNCTION	0.21137384631585124	0.005936520712512168
GO:0008649	rRNA methyltransferase activity	MOLECULAR_FUNCTION	0.21137384631585124	0.005936520712512168
GO:0098772	molecular function regulator	MOLECULAR_FUNCTION	0.21179452468748516	0.005977888263263677
GO:0031323	regulation of cellular metabolic process	BIOLOGICAL_PROCESS	0.21179452468748516	0.00598586456767146
GO:0097525	spliceosomal snRNP complex	CELLULAR_COMPONENT	0.21906928546666607	0.006221827330351584
GO:0030036	actin cytoskeleton organization	BIOLOGICAL_PROCESS	0.21906928546666607	0.0062302862261716845
GO:0032270	positive regulation of cellular protein metabolic process	BIOLOGICAL_PROCESS	0.21955726115774463	0.006263616381039582
GO:0016070	RNA metabolic process	BIOLOGICAL_PROCESS	0.2207602242174539	0.006337052595592723
GO:0048522	positive regulation of cellular process	BIOLOGICAL_PROCESS	0.2207602242174539	0.00633062420060768
GO:0030029	actin filament-based process	BIOLOGICAL_PROCESS	0.22346809733244655	0.006474179837663687
GO:0009605	response to external stimulus	BIOLOGICAL_PROCESS	0.22346809733244655	0.006454716011979764
GO:0080134	regulation of response to stress	BIOLOGICAL_PROCESS	0.22346809733244655	0.006474179837663687
GO:0048468	cell development	BIOLOGICAL_PROCESS	0.2272301428866588	0.006603303523241258
GO:0009201	ribonucleoside triphosphate biosynthetic process	BIOLOGICAL_PROCESS	0.23033795276681046	0.006734431152037517
GO:0006333	chromatin assembly or disassembly	BIOLOGICAL_PROCESS	0.23033795276681046	0.006734431152037517
GO:0019897	extrinsic component of plasma membrane	CELLULAR_COMPONENT	0.23295790921622556	0.0070736735631728494
GO:0005747	mitochondrial respiratory chain complex I	CELLULAR_COMPONENT	0.23295790921622556	0.0070736735631728494
GO:0098984	neuron to neuron synapse	CELLULAR_COMPONENT	0.23295790921622556	0.0070736735631728494
GO:0009678	pyrophosphate hydrolysis-driven proton transmembrane transporter activity	MOLECULAR_FUNCTION	0.23295790921622556	0.0070736735631728494
GO:0007140	male meiotic nuclear division	BIOLOGICAL_PROCESS	0.23295790921622556	0.0070736735631728494
GO:0030964	NADH dehydrogenase complex	CELLULAR_COMPONENT	0.23295790921622556	0.0070736735631728494
GO:0014069	postsynaptic density	CELLULAR_COMPONENT	0.23295790921622556	0.0070736735631728494
GO:0045271	respiratory chain complex I	CELLULAR_COMPONENT	0.23295790921622556	0.0070736735631728494
GO:0099572	postsynaptic specialization	CELLULAR_COMPONENT	0.23295790921622556	0.0070736735631728494
GO:0002756	MyD88-independent toll-like receptor signaling pathway	BIOLOGICAL_PROCESS	0.23295790921622556	0.0070736735631728494
GO:0032279	asymmetric synapse	CELLULAR_COMPONENT	0.23295790921622556	0.0070736735631728494
GO:0006091	generation of precursor metabolites and energy	BIOLOGICAL_PROCESS	0.23295790921622556	0.007079344631980631
GO:0046961	proton-transporting ATPase activity, rotational mechanism	MOLECULAR_FUNCTION	0.23295790921622556	0.0070736735631728494
GO:0030532	small nuclear ribonucleoprotein complex	CELLULAR_COMPONENT	0.238583290525338	0.007271431907567668
GO:1902533	positive regulation of intracellular signal transduction	BIOLOGICAL_PROCESS	0.2502810501587651	0.008304105463368862
GO:0019941	modification-dependent protein catabolic process	BIOLOGICAL_PROCESS	0.2502810501587651	0.00939631593620884
GO:0043620	regulation of DNA-templated transcription in response to stress	BIOLOGICAL_PROCESS	0.2502810501587651	0.0083009947905654
GO:0043618	regulation of transcription from RNA polymerase II promoter in response to stress	BIOLOGICAL_PROCESS	0.2502810501587651	0.0083009947905654
GO:0043549	regulation of kinase activity	BIOLOGICAL_PROCESS	0.2502810501587651	0.009107566213409645
GO:0097526	spliceosomal tri-snRNP complex	CELLULAR_COMPONENT	0.2502810501587651	0.0083009947905654
GO:0051881	regulation of mitochondrial membrane potential	BIOLOGICAL_PROCESS	0.2502810501587651	0.009616434434090633
GO:0120114	Sm-like protein family complex	CELLULAR_COMPONENT	0.2502810501587651	0.008419678225083427
GO:0097159	organic cyclic compound binding	MOLECULAR_FUNCTION	0.2502810501587651	0.008132582581149761
GO:0006511	ubiquitin-dependent protein catabolic process	BIOLOGICAL_PROCESS	0.2502810501587651	0.008958671430685926
GO:0044769	ATPase activity, coupled to transmembrane movement of ions, rotational mechanism	MOLECULAR_FUNCTION	0.2502810501587651	0.009616434434090633
GO:0140535	intracellular protein-containing complex	CELLULAR_COMPONENT	0.2502810501587651	0.009055395411710491
GO:1902905	positive regulation of supramolecular fiber organization	BIOLOGICAL_PROCESS	0.2502810501587651	0.009616434434090633
GO:0033043	regulation of organelle organization	BIOLOGICAL_PROCESS	0.2502810501587651	0.009451695406501362
GO:0071010	prespliceosome	CELLULAR_COMPONENT	0.2502810501587651	0.0083009947905654
GO:0016282	eukaryotic 43S preinitiation complex	CELLULAR_COMPONENT	0.2502810501587651	0.009616434434090633
GO:1901363	heterocyclic compound binding	MOLECULAR_FUNCTION	0.2502810501587651	0.0077108309325854725
GO:0006950	response to stress	BIOLOGICAL_PROCESS	0.2502810501587651	0.009431628864232518
GO:0005686	U2 snRNP	CELLULAR_COMPONENT	0.2502810501587651	0.009616434434090633
GO:0009144	purine nucleoside triphosphate metabolic process	BIOLOGICAL_PROCESS	0.2502810501587651	0.00966850265241196
GO:0009142	nucleoside triphosphate biosynthetic process	BIOLOGICAL_PROCESS	0.2502810501587651	0.008419678225083427
GO:0009199	ribonucleoside triphosphate metabolic process	BIOLOGICAL_PROCESS	0.2502810501587651	0.007833097454031452
GO:0048731	system development	BIOLOGICAL_PROCESS	0.2502810501587651	0.009087022570511435
GO:0002224	toll-like receptor signaling pathway	BIOLOGICAL_PROCESS	0.2502810501587651	0.0083009947905654
GO:0051247	positive regulation of protein metabolic process	BIOLOGICAL_PROCESS	0.2502810501587651	0.008687881528411242
GO:0009653	anatomical structure morphogenesis	BIOLOGICAL_PROCESS	0.2502810501587651	0.008952223406779227
GO:0008360	regulation of cell shape	BIOLOGICAL_PROCESS	0.2502810501587651	0.0083009947905654
GO:0002376	immune system process	BIOLOGICAL_PROCESS	0.2502810501587651	0.0080600701313138
GO:0051336	regulation of hydrolase activity	BIOLOGICAL_PROCESS	0.2502810501587651	0.008886262902270702
GO:0007169	transmembrane receptor protein tyrosine kinase signaling pathway	BIOLOGICAL_PROCESS	0.2502810501587651	0.009107566213409645
GO:0071456	cellular response to hypoxia	BIOLOGICAL_PROCESS	0.2502810501587651	0.009616434434090633
GO:0010468	regulation of gene expression	BIOLOGICAL_PROCESS	0.2502810501587651	0.009258045804798857
GO:0033178	proton-transporting two-sector ATPase complex, catalytic domain	CELLULAR_COMPONENT	0.2502810501587651	0.009616434434090633
GO:0010629	negative regulation of gene expression	BIOLOGICAL_PROCESS	0.2502810501587651	0.00971663032163348
GO:0009611	response to wounding	BIOLOGICAL_PROCESS	0.2502810501587651	0.007833097454031452
GO:0051117	ATPase binding	MOLECULAR_FUNCTION	0.2502810501587651	0.0083009947905654
GO:0033209	tumor necrosis factor-mediated signaling pathway	BIOLOGICAL_PROCESS	0.2502810501587651	0.0083009947905654
GO:0046546	development of primary male sexual characteristics	BIOLOGICAL_PROCESS	0.2502810501587651	0.0083009947905654
GO:0043207	response to external biotic stimulus	BIOLOGICAL_PROCESS	0.2502810501587651	0.007794808479413057
GO:0051707	response to other organism	BIOLOGICAL_PROCESS	0.2502810501587651	0.007794808479413057
GO:0000154	rRNA modification	BIOLOGICAL_PROCESS	0.2502810501587651	0.0083009947905654
GO:0008584	male gonad development	BIOLOGICAL_PROCESS	0.2502810501587651	0.0083009947905654
GO:0080090	regulation of primary metabolic process	BIOLOGICAL_PROCESS	0.2502810501587651	0.008948046503679809
GO:0043021	ribonucleoprotein complex binding	MOLECULAR_FUNCTION	0.2502810501587651	0.008419678225083427
GO:0043085	positive regulation of catalytic activity	BIOLOGICAL_PROCESS	0.2502810501587651	0.008745554290970237

## Sheet: Cluster 2
Supplementary Table 3. Each sheet of the table represents the blast2GO enrichment list of the total marker genes defined for each of the transcriptomic clusters.
GO ID	GO Name	GO Category	FDR	P-value
GO:0006508	proteolysis	BIOLOGICAL_PROCESS	0.015286510262197963	5.6423643499496134E-6
GO:0000323	lytic vacuole	CELLULAR_COMPONENT	0.015286510262197963	8.126079699936898E-6
GO:0005764	lysosome	CELLULAR_COMPONENT	0.015286510262197963	7.164452670122547E-6
GO:0005773	vacuole	CELLULAR_COMPONENT	0.015286510262197963	2.4251333777120207E-6
GO:0046794	transport of virus	BIOLOGICAL_PROCESS	0.015286510262197963	7.139864935519673E-6
GO:0075733	intracellular transport of virus	BIOLOGICAL_PROCESS	0.015286510262197963	7.139864935519673E-6
GO:0010939	regulation of necrotic cell death	BIOLOGICAL_PROCESS	0.017204720870830973	1.0670066988200304E-5
GO:0070265	necrotic cell death	BIOLOGICAL_PROCESS	0.029351690270277935	2.0803891393835695E-5
GO:0006952	defense response	BIOLOGICAL_PROCESS	0.053704332444839485	5.010873680512852E-5
GO:0009607	response to biotic stimulus	BIOLOGICAL_PROCESS	0.053704332444839485	5.010873680512852E-5
GO:0044419	biological process involved in interspecies interaction between organisms	BIOLOGICAL_PROCESS	0.053704332444839485	5.233876644752675E-5
GO:0048666	neuron development	BIOLOGICAL_PROCESS	0.06101093855605475	7.027041740309309E-5
GO:0038061	NIK/NF-kappaB signaling	BIOLOGICAL_PROCESS	0.06101093855605475	6.930848481141876E-5
GO:0065009	regulation of molecular function	BIOLOGICAL_PROCESS	0.0630932798448015	8.313130084341221E-5
GO:0007254	JNK cascade	BIOLOGICAL_PROCESS	0.0630932798448015	8.384860438309758E-5
GO:0030163	protein catabolic process	BIOLOGICAL_PROCESS	0.07690449245047563	1.0901673422588909E-4
GO:1902527	positive regulation of protein monoubiquitination	BIOLOGICAL_PROCESS	0.0793083409607314	1.5458345894711536E-4
GO:1902525	regulation of protein monoubiquitination	BIOLOGICAL_PROCESS	0.0793083409607314	1.5458345894711536E-4
GO:0031398	positive regulation of protein ubiquitination	BIOLOGICAL_PROCESS	0.0793083409607314	1.3901428401140022E-4
GO:1901575	organic substance catabolic process	BIOLOGICAL_PROCESS	0.0793083409607314	1.4971220143769016E-4
GO:0009056	catabolic process	BIOLOGICAL_PROCESS	0.0793083409607314	1.2186687529347963E-4
GO:0005615	extracellular space	CELLULAR_COMPONENT	0.0793083409607314	1.4592419016750096E-4
GO:1901565	organonitrogen compound catabolic process	BIOLOGICAL_PROCESS	0.08088624421172991	1.6482534038006447E-4
GO:1903322	positive regulation of protein modification by small protein conjugation or removal	BIOLOGICAL_PROCESS	0.08766428388493097	1.8640407665795544E-4
GO:0051403	stress-activated MAPK cascade	BIOLOGICAL_PROCESS	0.09271478216958214	2.13571749482514E-4
GO:0031098	stress-activated protein kinase signaling cascade	BIOLOGICAL_PROCESS	0.09271478216958214	2.13571749482514E-4
GO:0001818	negative regulation of cytokine production	BIOLOGICAL_PROCESS	0.0999960327387355	2.7531838140583203E-4
GO:0031396	regulation of protein ubiquitination	BIOLOGICAL_PROCESS	0.0999960327387355	3.1007895329633584E-4
GO:1902255	positive regulation of intrinsic apoptotic signaling pathway by p53 class mediator	BIOLOGICAL_PROCESS	0.0999960327387355	2.567795801413636E-4
GO:1902253	regulation of intrinsic apoptotic signaling pathway by p53 class mediator	BIOLOGICAL_PROCESS	0.0999960327387355	2.567795801413636E-4
GO:0030182	neuron differentiation	BIOLOGICAL_PROCESS	0.0999960327387355	3.0563904909068515E-4
GO:0051603	proteolysis involved in cellular protein catabolic process	BIOLOGICAL_PROCESS	0.0999960327387355	2.968172995245603E-4
GO:0031175	neuron projection development	BIOLOGICAL_PROCESS	0.0999960327387355	2.9802997834081743E-4
GO:0043207	response to external biotic stimulus	BIOLOGICAL_PROCESS	0.0999960327387355	2.9802997834081743E-4
GO:0051707	response to other organism	BIOLOGICAL_PROCESS	0.0999960327387355	2.9802997834081743E-4
GO:0009605	response to external stimulus	BIOLOGICAL_PROCESS	0.10205882373984887	3.3455980139757315E-4
GO:0044257	cellular protein catabolic process	BIOLOGICAL_PROCESS	0.10205882373984887	3.3455980139757315E-4
GO:0050776	regulation of immune response	BIOLOGICAL_PROCESS	0.10568069824199659	3.637559194529016E-4
GO:1901798	positive regulation of signal transduction by p53 class mediator	BIOLOGICAL_PROCESS	0.10568069824199659	3.8388487888029235E-4
GO:0006294	nucleotide-excision repair, preincision complex assembly	BIOLOGICAL_PROCESS	0.10568069824199659	3.8388487888029235E-4
GO:0002755	MyD88-dependent toll-like receptor signaling pathway	BIOLOGICAL_PROCESS	0.10568069824199659	3.8388487888029235E-4
GO:1901186	positive regulation of ERBB signaling pathway	BIOLOGICAL_PROCESS	0.11196018764066662	5.356472164965002E-4
GO:0070911	global genome nucleotide-excision repair	BIOLOGICAL_PROCESS	0.11196018764066662	5.356472164965002E-4
GO:0048699	generation of neurons	BIOLOGICAL_PROCESS	0.11196018764066662	4.4506709767827405E-4
GO:0006955	immune response	BIOLOGICAL_PROCESS	0.11196018764066662	5.261817689294655E-4
GO:0047497	mitochondrion transport along microtubule	BIOLOGICAL_PROCESS	0.11196018764066662	5.356472164965002E-4
GO:0000717	nucleotide-excision repair, DNA duplex unwinding	BIOLOGICAL_PROCESS	0.11196018764066662	5.356472164965002E-4
GO:0000715	nucleotide-excision repair, DNA damage recognition	BIOLOGICAL_PROCESS	0.11196018764066662	5.356472164965002E-4
GO:0034643	establishment of mitochondrion localization, microtubule-mediated	BIOLOGICAL_PROCESS	0.11196018764066662	5.356472164965002E-4
GO:0051090	regulation of DNA-binding transcription factor activity	BIOLOGICAL_PROCESS	0.11196018764066662	5.262493376728956E-4
GO:0051654	establishment of mitochondrion localization	BIOLOGICAL_PROCESS	0.11196018764066662	5.356472164965002E-4
GO:0045742	positive regulation of epidermal growth factor receptor signaling pathway	BIOLOGICAL_PROCESS	0.11196018764066662	5.356472164965002E-4
GO:1903320	regulation of protein modification by small protein conjugation or removal	BIOLOGICAL_PROCESS	0.11196018764066662	4.770837635261435E-4
GO:0032268	regulation of cellular protein metabolic process	BIOLOGICAL_PROCESS	0.11196018764066662	4.5461865028979294E-4
GO:0008234	cysteine-type peptidase activity	MOLECULAR_FUNCTION	0.11990618573799681	5.842863662257309E-4
GO:0050790	regulation of catalytic activity	BIOLOGICAL_PROCESS	0.1255531010292008	6.235508832131458E-4
GO:0001666	response to hypoxia	BIOLOGICAL_PROCESS	0.1255531010292008	6.340503905966551E-4
GO:0036293	response to decreased oxygen levels	BIOLOGICAL_PROCESS	0.12752811044874823	6.928437153001372E-4
GO:0030162	regulation of proteolysis	BIOLOGICAL_PROCESS	0.12752811044874823	6.798939013710348E-4
GO:0051246	regulation of protein metabolic process	BIOLOGICAL_PROCESS	0.12752811044874823	6.936332584038445E-4
GO:0070423	nucleotide-binding oligomerization domain containing signaling pathway	BIOLOGICAL_PROCESS	0.12752811044874823	7.118163336822131E-4
GO:0038128	ERBB2 signaling pathway	BIOLOGICAL_PROCESS	0.12752811044874823	7.118163336822131E-4
GO:0035872	nucleotide-binding domain, leucine rich repeat containing receptor signaling pathway	BIOLOGICAL_PROCESS	0.12752811044874823	7.118163336822131E-4
GO:0032990	cell part morphogenesis	BIOLOGICAL_PROCESS	0.1293183219315968	9.491395734058051E-4
GO:0042276	error-prone translesion synthesis	BIOLOGICAL_PROCESS	0.1293183219315968	9.121438384684501E-4
GO:1901185	negative regulation of ERBB signaling pathway	BIOLOGICAL_PROCESS	0.1293183219315968	9.121438384684501E-4
GO:0098542	defense response to other organism	BIOLOGICAL_PROCESS	0.1293183219315968	9.491395734058051E-4
GO:0070987	error-free translesion synthesis	BIOLOGICAL_PROCESS	0.1293183219315968	9.121438384684501E-4
GO:0042059	negative regulation of epidermal growth factor receptor signaling pathway	BIOLOGICAL_PROCESS	0.1293183219315968	9.121438384684501E-4
GO:0120039	plasma membrane bounded cell projection morphogenesis	BIOLOGICAL_PROCESS	0.1293183219315968	9.491395734058051E-4
GO:0048812	neuron projection morphogenesis	BIOLOGICAL_PROCESS	0.1293183219315968	8.681229936075255E-4
GO:0048858	cell projection morphogenesis	BIOLOGICAL_PROCESS	0.1293183219315968	9.491395734058051E-4
GO:2001244	positive regulation of intrinsic apoptotic signaling pathway	BIOLOGICAL_PROCESS	0.1293183219315968	9.121438384684501E-4
GO:0022008	neurogenesis	BIOLOGICAL_PROCESS	0.1293183219315968	9.555774759631879E-4
GO:0009057	macromolecule catabolic process	BIOLOGICAL_PROCESS	0.1293183219315968	8.048287235742765E-4
GO:0006950	response to stress	BIOLOGICAL_PROCESS	0.1293183219315968	9.433939008744953E-4
GO:0051241	negative regulation of multicellular organismal process	BIOLOGICAL_PROCESS	0.1293183219315968	7.559271761567263E-4
GO:0019058	viral life cycle	BIOLOGICAL_PROCESS	0.1293183219315968	9.624115391383124E-4
GO:0070482	response to oxygen levels	BIOLOGICAL_PROCESS	0.1293183219315968	7.550017762598613E-4
GO:0051646	mitochondrion localization	BIOLOGICAL_PROCESS	0.1293183219315968	9.121438384684501E-4
GO:0032480	negative regulation of type I interferon production	BIOLOGICAL_PROCESS	0.1293183219315968	9.121438384684501E-4
GO:0006296	nucleotide-excision repair, DNA incision, 5'-to lesion	BIOLOGICAL_PROCESS	0.1293183219315968	9.121438384684501E-4
GO:0006297	nucleotide-excision repair, DNA gap filling	BIOLOGICAL_PROCESS	0.1293183219315968	9.121438384684501E-4
GO:0002764	immune response-regulating signaling pathway	BIOLOGICAL_PROCESS	0.1293183219315968	8.897123470549145E-4
GO:0030512	negative regulation of transforming growth factor beta receptor signaling pathway	BIOLOGICAL_PROCESS	0.14742939203882754	0.0011363831937076278
GO:0010803	regulation of tumor necrosis factor-mediated signaling pathway	BIOLOGICAL_PROCESS	0.14742939203882754	0.0011363831937076278
GO:0002753	cytoplasmic pattern recognition receptor signaling pathway	BIOLOGICAL_PROCESS	0.14742939203882754	0.0011363831937076278
GO:0061418	regulation of transcription from RNA polymerase II promoter in response to hypoxia	BIOLOGICAL_PROCESS	0.16983128157289515	0.001384289705387291
GO:0036297	interstrand cross-link repair	BIOLOGICAL_PROCESS	0.16983128157289515	0.001384289705387291
GO:0035666	TRIF-dependent toll-like receptor signaling pathway	BIOLOGICAL_PROCESS	0.16983128157289515	0.001384289705387291
GO:0005576	extracellular region	CELLULAR_COMPONENT	0.16983128157289515	0.001334419364565677
GO:0030666	endocytic vesicle membrane	CELLULAR_COMPONENT	0.16983128157289515	0.001384289705387291
GO:0031401	positive regulation of protein modification process	BIOLOGICAL_PROCESS	0.17422049910821036	0.0014355015874070668
GO:1903844	regulation of cellular response to transforming growth factor beta stimulus	BIOLOGICAL_PROCESS	0.1790384357386783	0.001655620509846252
GO:0032989	cellular component morphogenesis	BIOLOGICAL_PROCESS	0.1790384357386783	0.0014921156098167529
GO:0031399	regulation of protein modification process	BIOLOGICAL_PROCESS	0.1790384357386783	0.001673561985865619
GO:0060071	Wnt signaling pathway, planar cell polarity pathway	BIOLOGICAL_PROCESS	0.1790384357386783	0.001655620509846252
GO:1901564	organonitrogen compound metabolic process	BIOLOGICAL_PROCESS	0.1790384357386783	0.0015146032330477198
GO:2001235	positive regulation of apoptotic signaling pathway	BIOLOGICAL_PROCESS	0.1790384357386783	0.001655620509846252
GO:0090175	regulation of establishment of planar polarity	BIOLOGICAL_PROCESS	0.1790384357386783	0.001655620509846252
GO:0044093	positive regulation of molecular function	BIOLOGICAL_PROCESS	0.1790384357386783	0.001653656489656736
GO:0051092	positive regulation of NF-kappaB transcription factor activity	BIOLOGICAL_PROCESS	0.1790384357386783	0.001655620509846252
GO:0061136	regulation of proteasomal protein catabolic process	BIOLOGICAL_PROCESS	0.1790384357386783	0.0016814099573225748
GO:0017015	regulation of transforming growth factor beta receptor signaling pathway	BIOLOGICAL_PROCESS	0.1790384357386783	0.001655620509846252
GO:0002756	MyD88-independent toll-like receptor signaling pathway	BIOLOGICAL_PROCESS	0.1790384357386783	0.001655620509846252
GO:0033683	nucleotide-excision repair, DNA incision	BIOLOGICAL_PROCESS	0.1790384357386783	0.001655620509846252
GO:0043620	regulation of DNA-templated transcription in response to stress	BIOLOGICAL_PROCESS	0.18812964793621978	0.001950134562641775
GO:0043618	regulation of transcription from RNA polymerase II promoter in response to stress	BIOLOGICAL_PROCESS	0.18812964793621978	0.001950134562641775
GO:1901184	regulation of ERBB signaling pathway	BIOLOGICAL_PROCESS	0.18812964793621978	0.001950134562641775
GO:0001817	regulation of cytokine production	BIOLOGICAL_PROCESS	0.18812964793621978	0.0017894416823022404
GO:0042058	regulation of epidermal growth factor receptor signaling pathway	BIOLOGICAL_PROCESS	0.18812964793621978	0.001950134562641775
GO:0072332	intrinsic apoptotic signaling pathway by p53 class mediator	BIOLOGICAL_PROCESS	0.18812964793621978	0.001950134562641775
GO:0001959	regulation of cytokine-mediated signaling pathway	BIOLOGICAL_PROCESS	0.18812964793621978	0.001950134562641775
GO:0002224	toll-like receptor signaling pathway	BIOLOGICAL_PROCESS	0.18812964793621978	0.001950134562641775
GO:0019068	virion assembly	BIOLOGICAL_PROCESS	0.18812964793621978	0.001950134562641775
GO:0002020	protease binding	MOLECULAR_FUNCTION	0.18812964793621978	0.001950134562641775
GO:0033209	tumor necrosis factor-mediated signaling pathway	BIOLOGICAL_PROCESS	0.18812964793621978	0.001950134562641775
GO:0048468	cell development	BIOLOGICAL_PROCESS	0.1917455915076265	0.0020215934605659213
GO:1903050	regulation of proteolysis involved in cellular protein catabolic process	BIOLOGICAL_PROCESS	0.1917455915076265	0.0020182876730617735
GO:0002682	regulation of immune system process	BIOLOGICAL_PROCESS	0.20189532630191176	0.0021464905782076203
GO:0051881	regulation of mitochondrial membrane potential	BIOLOGICAL_PROCESS	0.20640579006518964	0.00226759262586015
GO:0009250	glucan biosynthetic process	BIOLOGICAL_PROCESS	0.20640579006518964	0.00226759262586015
GO:0005978	glycogen biosynthetic process	BIOLOGICAL_PROCESS	0.20640579006518964	0.00226759262586015
GO:0071456	cellular response to hypoxia	BIOLOGICAL_PROCESS	0.20640579006518964	0.00226759262586015
GO:0008233	peptidase activity	MOLECULAR_FUNCTION	0.2103575324396537	0.0023296439758090466
GO:0019985	translesion synthesis	BIOLOGICAL_PROCESS	0.21175364139483882	0.0026077572564793656
GO:0001816	cytokine production	BIOLOGICAL_PROCESS	0.21175364139483882	0.0025287072193194127
GO:0036294	cellular response to decreased oxygen levels	BIOLOGICAL_PROCESS	0.21175364139483882	0.0026077572564793656
GO:0071356	cellular response to tumor necrosis factor	BIOLOGICAL_PROCESS	0.21175364139483882	0.0026077572564793656
GO:0090101	negative regulation of transmembrane receptor protein serine/threonine kinase signaling pathway	BIOLOGICAL_PROCESS	0.21175364139483882	0.0026077572564793656
GO:0002221	pattern recognition receptor signaling pathway	BIOLOGICAL_PROCESS	0.21175364139483882	0.0026077572564793656
GO:0034612	response to tumor necrosis factor	BIOLOGICAL_PROCESS	0.21175364139483882	0.0026077572564793656
GO:0060759	regulation of response to cytokine stimulus	BIOLOGICAL_PROCESS	0.21175364139483882	0.0026077572564793656
GO:0032479	regulation of type I interferon production	BIOLOGICAL_PROCESS	0.21175364139483882	0.0026077572564793656
GO:0080134	regulation of response to stress	BIOLOGICAL_PROCESS	0.21175364139483882	0.0023760607909869705
GO:0043161	proteasome-mediated ubiquitin-dependent protein catabolic process	BIOLOGICAL_PROCESS	0.21175364139483882	0.0024561956607126465
GO:1903362	regulation of cellular protein catabolic process	BIOLOGICAL_PROCESS	0.21175364139483882	0.0025287072193194127
GO:0032606	type I interferon production	BIOLOGICAL_PROCESS	0.21175364139483882	0.0026077572564793656
GO:0033692	cellular polysaccharide biosynthetic process	BIOLOGICAL_PROCESS	0.21175364139483882	0.0026077572564793656
GO:0048583	regulation of response to stimulus	BIOLOGICAL_PROCESS	0.21243028400597644	0.002634910938321671
GO:0045087	innate immune response	BIOLOGICAL_PROCESS	0.21354171842420036	0.0026676160448137016
GO:0050852	T cell receptor signaling pathway	BIOLOGICAL_PROCESS	0.2177066459933371	0.0029703927955146555
GO:0000209	protein polyubiquitination	BIOLOGICAL_PROCESS	0.2177066459933371	0.0029593630779617924
GO:1990840	response to lectin	BIOLOGICAL_PROCESS	0.2177066459933371	0.0029703927955146555
GO:1990858	cellular response to lectin	BIOLOGICAL_PROCESS	0.2177066459933371	0.0029703927955146555
GO:0016236	macroautophagy	BIOLOGICAL_PROCESS	0.2177066459933371	0.0029593630779617924
GO:0002220	innate immune response activating cell surface receptor signaling pathway	BIOLOGICAL_PROCESS	0.2177066459933371	0.0029703927955146555
GO:0002223	stimulatory C-type lectin receptor signaling pathway	BIOLOGICAL_PROCESS	0.2177066459933371	0.0029703927955146555
GO:0002218	activation of innate immune response	BIOLOGICAL_PROCESS	0.2177066459933371	0.0029703927955146555
GO:0034637	cellular carbohydrate biosynthetic process	BIOLOGICAL_PROCESS	0.2177066459933371	0.0029703927955146555
GO:0071453	cellular response to oxygen levels	BIOLOGICAL_PROCESS	0.2177066459933371	0.0029703927955146555
GO:0006283	transcription-coupled nucleotide-excision repair	BIOLOGICAL_PROCESS	0.2177066459933371	0.0029703927955146555
GO:0002758	innate immune response-activating signal transduction	BIOLOGICAL_PROCESS	0.2177066459933371	0.0029703927955146555
GO:0044265	cellular macromolecule catabolic process	BIOLOGICAL_PROCESS	0.2177066459933371	0.0028548376444219297
GO:0010498	proteasomal protein catabolic process	BIOLOGICAL_PROCESS	0.22354566081793234	0.003069865989791753
GO:0031347	regulation of defense response	BIOLOGICAL_PROCESS	0.22518295434901872	0.0031123009549434678
GO:0050851	antigen receptor-mediated signaling pathway	BIOLOGICAL_PROCESS	0.2357130617807847	0.0033552653544165856
GO:0000271	polysaccharide biosynthetic process	BIOLOGICAL_PROCESS	0.2357130617807847	0.0033552653544165856
GO:0000902	cell morphogenesis	BIOLOGICAL_PROCESS	0.2357130617807847	0.0033622577254103247
GO:0006977	DNA damage response, signal transduction by p53 class mediator resulting in cell cycle arrest	BIOLOGICAL_PROCESS	0.2357130617807847	0.0033552653544165856
GO:0031145	anaphase-promoting complex-dependent catabolic process	BIOLOGICAL_PROCESS	0.2357130617807847	0.0033552653544165856
GO:0031571	mitotic G1 DNA damage checkpoint signaling	BIOLOGICAL_PROCESS	0.24404198759433732	0.003762142805122237
GO:0001736	establishment of planar polarity	BIOLOGICAL_PROCESS	0.24404198759433732	0.003762142805122237
GO:2000027	regulation of animal organ morphogenesis	BIOLOGICAL_PROCESS	0.24404198759433732	0.003762142805122237
GO:0120036	plasma membrane bounded cell projection organization	BIOLOGICAL_PROCESS	0.24404198759433732	0.0035744713024587135
GO:0044819	mitotic G1/S transition checkpoint signaling	BIOLOGICAL_PROCESS	0.24404198759433732	0.003762142805122237
GO:0072384	organelle transport along microtubule	BIOLOGICAL_PROCESS	0.24404198759433732	0.003762142805122237
GO:0009653	anatomical structure morphogenesis	BIOLOGICAL_PROCESS	0.24404198759433732	0.0036072079861601694
GO:0007173	epidermal growth factor receptor signaling pathway	BIOLOGICAL_PROCESS	0.24404198759433732	0.003762142805122237
GO:0007164	establishment of tissue polarity	BIOLOGICAL_PROCESS	0.24404198759433732	0.003762142805122237
GO:1901796	regulation of signal transduction by p53 class mediator	BIOLOGICAL_PROCESS	0.24404198759433732	0.003762142805122237
GO:0038095	Fc-epsilon receptor signaling pathway	BIOLOGICAL_PROCESS	0.24404198759433732	0.003762142805122237
GO:0043123	positive regulation of I-kappaB kinase/NF-kappaB signaling	BIOLOGICAL_PROCESS	0.24404198759433732	0.003762142805122237
GO:0043069	negative regulation of programmed cell death	BIOLOGICAL_PROCESS	0.24404198759433732	0.003673082128654128
GO:2000134	negative regulation of G1/S transition of mitotic cell cycle	BIOLOGICAL_PROCESS	0.26573876708934796	0.004190794767600242
GO:0006513	protein monoubiquitination	BIOLOGICAL_PROCESS	0.26573876708934796	0.004190794767600242
GO:0045089	positive regulation of innate immune response	BIOLOGICAL_PROCESS	0.26573876708934796	0.004190794767600242
GO:0051091	positive regulation of DNA-binding transcription factor activity	BIOLOGICAL_PROCESS	0.26573876708934796	0.004190794767600242
GO:0019538	protein metabolic process	BIOLOGICAL_PROCESS	0.2697164481867634	0.004277420415117449
GO:0051656	establishment of organelle localization	BIOLOGICAL_PROCESS	0.27083187102054146	0.004319104880277971
GO:0001738	morphogenesis of a polarized epithelium	BIOLOGICAL_PROCESS	0.27656939922800655	0.004640992598993621
GO:0032693	negative regulation of interleukin-10 production	BIOLOGICAL_PROCESS	0.27656939922800655	0.005121201775374623
GO:0006511	ubiquitin-dependent protein catabolic process	BIOLOGICAL_PROCESS	0.27656939922800655	0.005053730413941803
GO:0072520	seminiferous tubule development	BIOLOGICAL_PROCESS	0.27656939922800655	0.005121201775374623
GO:0042834	peptidoglycan binding	MOLECULAR_FUNCTION	0.27656939922800655	0.005121201775374623
GO:0030882	lipid antigen binding	MOLECULAR_FUNCTION	0.27656939922800655	0.005121201775374623
GO:0008039	synaptic target recognition	BIOLOGICAL_PROCESS	0.27656939922800655	0.005121201775374623
GO:1902807	negative regulation of cell cycle G1/S phase transition	BIOLOGICAL_PROCESS	0.27656939922800655	0.004640992598993621
GO:0060613	fat pad development	BIOLOGICAL_PROCESS	0.27656939922800655	0.005121201775374623
GO:0060612	adipose tissue development	BIOLOGICAL_PROCESS	0.27656939922800655	0.005121201775374623
GO:0030581	symbiont intracellular protein transport in host	BIOLOGICAL_PROCESS	0.27656939922800655	0.005121201775374623
GO:1900095	regulation of dosage compensation by inactivation of X chromosome	BIOLOGICAL_PROCESS	0.27656939922800655	0.005121201775374623
GO:0000731	DNA synthesis involved in DNA repair	BIOLOGICAL_PROCESS	0.27656939922800655	0.005112509381776867
GO:0034701	tripeptidase activity	MOLECULAR_FUNCTION	0.27656939922800655	0.005121201775374623
GO:0019060	intracellular transport of viral protein in host cell	BIOLOGICAL_PROCESS	0.27656939922800655	0.005121201775374623
GO:0008543	fibroblast growth factor receptor signaling pathway	BIOLOGICAL_PROCESS	0.27656939922800655	0.004640992598993621
GO:0071774	response to fibroblast growth factor	BIOLOGICAL_PROCESS	0.27656939922800655	0.005112509381776867
GO:0038127	ERBB signaling pathway	BIOLOGICAL_PROCESS	0.27656939922800655	0.005112509381776867
GO:0060816	random inactivation of X chromosome	BIOLOGICAL_PROCESS	0.27656939922800655	0.005121201775374623
GO:0075606	transport of viral material towards nucleus	BIOLOGICAL_PROCESS	0.27656939922800655	0.005121201775374623
GO:0021979	hypothalamus cell differentiation	BIOLOGICAL_PROCESS	0.27656939922800655	0.005121201775374623
GO:0021886	hypothalamus gonadotrophin-releasing hormone neuron differentiation	BIOLOGICAL_PROCESS	0.27656939922800655	0.005121201775374623
GO:0021888	hypothalamus gonadotrophin-releasing hormone neuron development	BIOLOGICAL_PROCESS	0.27656939922800655	0.005121201775374623
GO:0045859	regulation of protein kinase activity	BIOLOGICAL_PROCESS	0.27656939922800655	0.00451149495154332
GO:0070891	lipoteichoic acid binding	MOLECULAR_FUNCTION	0.27656939922800655	0.005121201775374623
GO:0045599	negative regulation of fat cell differentiation	BIOLOGICAL_PROCESS	0.27656939922800655	0.005121201775374623
GO:0075519	microtubule-dependent intracellular transport of viral material	BIOLOGICAL_PROCESS	0.27656939922800655	0.005121201775374623
GO:0075521	microtubule-dependent intracellular transport of viral material towards nucleus	BIOLOGICAL_PROCESS	0.27656939922800655	0.005121201775374623
GO:0044344	cellular response to fibroblast growth factor stimulus	BIOLOGICAL_PROCESS	0.27656939922800655	0.005112509381776867
GO:0019941	modification-dependent protein catabolic process	BIOLOGICAL_PROCESS	0.2809697442425412	0.005252468861094727
GO:0030030	cell projection organization	BIOLOGICAL_PROCESS	0.2809697442425412	0.005252468861094727
GO:0060548	negative regulation of cell death	BIOLOGICAL_PROCESS	0.2865941457663028	0.005383003358062922
GO:0030330	DNA damage response, signal transduction by p53 class mediator	BIOLOGICAL_PROCESS	0.29289346505867486	0.005605119912525363
GO:0016032	viral process	BIOLOGICAL_PROCESS	0.29289346505867486	0.005551025917065066
GO:0031349	positive regulation of defense response	BIOLOGICAL_PROCESS	0.29289346505867486	0.005605119912525363
GO:0002833	positive regulation of response to biotic stimulus	BIOLOGICAL_PROCESS	0.29289346505867486	0.005605119912525363
GO:0042176	regulation of protein catabolic process	BIOLOGICAL_PROCESS	0.3003645490261252	0.005774706045775598
GO:0098772	molecular function regulator	MOLECULAR_FUNCTION	0.302734085943631	0.0058470834354311645
GO:0043632	modification-dependent macromolecule catabolic process	BIOLOGICAL_PROCESS	0.30314642306194717	0.005881905435506905
GO:0090090	negative regulation of canonical Wnt signaling pathway	BIOLOGICAL_PROCESS	0.31108399092561034	0.006118600689774564
GO:0038093	Fc receptor signaling pathway	BIOLOGICAL_PROCESS	0.31108399092561034	0.006118600689774564
GO:0006301	postreplication repair	BIOLOGICAL_PROCESS	0.31108399092561034	0.006118600689774564
GO:1902533	positive regulation of intracellular signal transduction	BIOLOGICAL_PROCESS	0.3264116878629648	0.006477914244821841
GO:0006869	lipid transport	BIOLOGICAL_PROCESS	0.3264116878629648	0.006477914244821841
GO:1901214	regulation of neuron death	BIOLOGICAL_PROCESS	0.32647548884473554	0.006652729904694708
GO:0030139	endocytic vesicle	CELLULAR_COMPONENT	0.32647548884473554	0.006652729904694708
GO:2001242	regulation of intrinsic apoptotic signaling pathway	BIOLOGICAL_PROCESS	0.32647548884473554	0.006652729904694708
GO:0090263	positive regulation of canonical Wnt signaling pathway	BIOLOGICAL_PROCESS	0.32647548884473554	0.006652729904694708
GO:0007179	transforming growth factor beta receptor signaling pathway	BIOLOGICAL_PROCESS	0.32647548884473554	0.006652729904694708
GO:0043122	regulation of I-kappaB kinase/NF-kappaB signaling	BIOLOGICAL_PROCESS	0.32647548884473554	0.006652729904694708
GO:0000165	MAPK cascade	BIOLOGICAL_PROCESS	0.32850283935417857	0.00672314661919157
GO:0043549	regulation of kinase activity	BIOLOGICAL_PROCESS	0.3392835740919807	0.006973845059744796
GO:0035567	non-canonical Wnt signaling pathway	BIOLOGICAL_PROCESS	0.34616448172180014	0.00720728742842412
GO:0005977	glycogen metabolic process	BIOLOGICAL_PROCESS	0.34616448172180014	0.00720728742842412
GO:0006112	energy reserve metabolic process	BIOLOGICAL_PROCESS	0.34616448172180014	0.00720728742842412
GO:0002757	immune response-activating signal transduction	BIOLOGICAL_PROCESS	0.37061625546294114	0.0077820548015165285
GO:0002429	immune response-activating cell surface receptor signaling pathway	BIOLOGICAL_PROCESS	0.37061625546294114	0.0077820548015165285
GO:0032270	positive regulation of cellular protein metabolic process	BIOLOGICAL_PROCESS	0.3751140261812263	0.007909731392853005
GO:2000045	regulation of G1/S transition of mitotic cell cycle	BIOLOGICAL_PROCESS	0.39069881575102594	0.008376815222091634
GO:0030177	positive regulation of Wnt signaling pathway	BIOLOGICAL_PROCESS	0.39069881575102594	0.008376815222091634
GO:0007249	I-kappaB kinase/NF-kappaB signaling	BIOLOGICAL_PROCESS	0.39069881575102594	0.008376815222091634
GO:0044248	cellular catabolic process	BIOLOGICAL_PROCESS	0.39069881575102594	0.008374920617878173
GO:0090092	regulation of transmembrane receptor protein serine/threonine kinase signaling pathway	BIOLOGICAL_PROCESS	0.41087209461754126	0.008991353536859457
GO:0070997	neuron death	BIOLOGICAL_PROCESS	0.41087209461754126	0.008991353536859457
GO:0002253	activation of immune response	BIOLOGICAL_PROCESS	0.41087209461754126	0.008991353536859457
GO:0071560	cellular response to transforming growth factor beta stimulus	BIOLOGICAL_PROCESS	0.41087209461754126	0.008991353536859457
GO:0071559	response to transforming growth factor beta	BIOLOGICAL_PROCESS	0.41087209461754126	0.008991353536859457
GO:0030234	enzyme regulator activity	MOLECULAR_FUNCTION	0.4249746264517472	0.00979200482878189
GO:0030178	negative regulation of Wnt signaling pathway	BIOLOGICAL_PROCESS	0.4249746264517472	0.00962545622872283
GO:0044773	mitotic DNA damage checkpoint signaling	BIOLOGICAL_PROCESS	0.4249746264517472	0.00962545622872283
GO:0090287	regulation of cellular response to growth factor stimulus	BIOLOGICAL_PROCESS	0.4249746264517472	0.00962545622872283
GO:0019221	cytokine-mediated signaling pathway	BIOLOGICAL_PROCESS	0.4249746264517472	0.00962545622872283
GO:0007399	nervous system development	BIOLOGICAL_PROCESS	0.4249746264517472	0.009539970661688105

## Sheet: Cluster 3
Supplementary Table 3. Each sheet of the table represents the blast2GO enrichment list of the total marker genes defined for each of the transcriptomic clusters.
GO ID	GO Name	GO Category	FDR	P-value
GO:0000323	lytic vacuole	CELLULAR_COMPONENT	1.4081450263269245E-4	2.49516262306534E-8
GO:0005764	lysosome	CELLULAR_COMPONENT	1.4081450263269245E-4	2.0582209097790433E-8
GO:0005773	vacuole	CELLULAR_COMPONENT	7.490596244428875E-4	1.9909443371388877E-7
GO:0004197	cysteine-type endopeptidase activity	MOLECULAR_FUNCTION	0.7061484241200392	2.659280100829657E-4
GO:0055092	sterol homeostasis	BIOLOGICAL_PROCESS	0.7061484241200392	3.1281493050413714E-4
GO:0046661	male sex differentiation	BIOLOGICAL_PROCESS	0.7392321870247499	3.9296474901643475E-4
GO:0065009	regulation of molecular function	BIOLOGICAL_PROCESS	0.8141883121993327	5.049453517671064E-4
GO:0050790	regulation of catalytic activity	BIOLOGICAL_PROCESS	0.8420998001872256	5.968635068218131E-4
GO:0061458	reproductive system development	BIOLOGICAL_PROCESS	1.0	0.006091859262903105
GO:0098770	FBXO family protein binding	MOLECULAR_FUNCTION	1.0	0.0072834869690927406
GO:0001740	Barr body	CELLULAR_COMPONENT	1.0	0.0072834869690927406
GO:0065004	protein-DNA complex assembly	BIOLOGICAL_PROCESS	1.0	0.004559152083203431
GO:1902340	negative regulation of chromosome condensation	BIOLOGICAL_PROCESS	1.0	0.0072834869690927406
GO:0070990	snRNP binding	MOLECULAR_FUNCTION	1.0	0.0072834869690927406
GO:0044815	DNA packaging complex	CELLULAR_COMPONENT	1.0	0.007461604630365778
GO:0052126	movement in host environment	BIOLOGICAL_PROCESS	1.0	0.0018325540702054078
GO:0003199	endocardial cushion to mesenchymal transition involved in heart valve formation	BIOLOGICAL_PROCESS	1.0	0.0072834869690927406
GO:0048878	chemical homeostasis	BIOLOGICAL_PROCESS	1.0	0.005257212284280754
GO:0072520	seminiferous tubule development	BIOLOGICAL_PROCESS	1.0	0.0072834869690927406
GO:0005700	polytene chromosome	CELLULAR_COMPONENT	1.0	0.0072834869690927406
GO:0042834	peptidoglycan binding	MOLECULAR_FUNCTION	1.0	0.0072834869690927406
GO:0090500	endocardial cushion to mesenchymal transition	BIOLOGICAL_PROCESS	1.0	0.0072834869690927406
GO:0030882	lipid antigen binding	MOLECULAR_FUNCTION	1.0	0.0072834869690927406
GO:0008039	synaptic target recognition	BIOLOGICAL_PROCESS	1.0	0.0072834869690927406
GO:0045046	protein import into peroxisome membrane	BIOLOGICAL_PROCESS	1.0	0.0072834869690927406
GO:0060623	regulation of chromosome condensation	BIOLOGICAL_PROCESS	1.0	0.0072834869690927406
GO:0060613	fat pad development	BIOLOGICAL_PROCESS	1.0	0.0072834869690927406
GO:0060612	adipose tissue development	BIOLOGICAL_PROCESS	1.0	0.0072834869690927406
GO:0030581	symbiont intracellular protein transport in host	BIOLOGICAL_PROCESS	1.0	0.0072834869690927406
GO:0048608	reproductive structure development	BIOLOGICAL_PROCESS	1.0	0.006091859262903105
GO:0005615	extracellular space	CELLULAR_COMPONENT	1.0	8.832303327860482E-4
GO:0000786	nucleosome	CELLULAR_COMPONENT	1.0	0.005908131069705507
GO:0034701	tripeptidase activity	MOLECULAR_FUNCTION	1.0	0.0072834869690927406
GO:0007040	lysosome organization	BIOLOGICAL_PROCESS	1.0	0.004523171654581492
GO:0007042	lysosomal lumen acidification	BIOLOGICAL_PROCESS	1.0	0.0072834869690927406
GO:0019060	intracellular transport of viral protein in host cell	BIOLOGICAL_PROCESS	1.0	0.0072834869690927406
GO:0019058	viral life cycle	BIOLOGICAL_PROCESS	1.0	0.002643048514235927
GO:0008553	P-type proton-exporting transporter activity	MOLECULAR_FUNCTION	1.0	0.0072834869690927406
GO:0007140	male meiotic nuclear division	BIOLOGICAL_PROCESS	1.0	0.003311945124307047
GO:0046718	viral entry into host cell	BIOLOGICAL_PROCESS	1.0	0.0010792519828833867
GO:0046794	transport of virus	BIOLOGICAL_PROCESS	1.0	0.0014321429668806551
GO:0038061	NIK/NF-kappaB signaling	BIOLOGICAL_PROCESS	1.0	0.005908131069705507
GO:0008234	cysteine-type peptidase activity	MOLECULAR_FUNCTION	1.0	0.002804934007340721
GO:0035855	megakaryocyte development	BIOLOGICAL_PROCESS	1.0	0.0072834869690927406
GO:0046546	development of primary male sexual characteristics	BIOLOGICAL_PROCESS	1.0	0.003895511140782523
GO:0075606	transport of viral material towards nucleus	BIOLOGICAL_PROCESS	1.0	0.0072834869690927406
GO:0080171	lytic vacuole organization	BIOLOGICAL_PROCESS	1.0	0.004523171654581492
GO:0007548	sex differentiation	BIOLOGICAL_PROCESS	1.0	0.003765654439030132
GO:0044409	entry into host	BIOLOGICAL_PROCESS	1.0	0.0010792519828833867
GO:0044403	biological process involved in symbiotic interaction	BIOLOGICAL_PROCESS	1.0	0.005194263593105002
GO:0015918	sterol transport	BIOLOGICAL_PROCESS	1.0	0.003895511140782523
GO:0044419	biological process involved in interspecies interaction between organisms	BIOLOGICAL_PROCESS	1.0	0.002539297169885543
GO:0075733	intracellular transport of virus	BIOLOGICAL_PROCESS	1.0	0.0014321429668806551
GO:0021979	hypothalamus cell differentiation	BIOLOGICAL_PROCESS	1.0	0.0072834869690927406
GO:0007599	hemostasis	BIOLOGICAL_PROCESS	1.0	0.009178486444272086
GO:0021886	hypothalamus gonadotrophin-releasing hormone neuron differentiation	BIOLOGICAL_PROCESS	1.0	0.0072834869690927406
GO:0021888	hypothalamus gonadotrophin-releasing hormone neuron development	BIOLOGICAL_PROCESS	1.0	0.0072834869690927406
GO:2000504	positive regulation of blood vessel remodeling	BIOLOGICAL_PROCESS	1.0	0.0072834869690927406
GO:0051701	biological process involved in interaction with host	BIOLOGICAL_PROCESS	1.0	0.0027731439359821434
GO:0070891	lipoteichoic acid binding	MOLECULAR_FUNCTION	1.0	0.0072834869690927406
GO:0008584	male gonad development	BIOLOGICAL_PROCESS	1.0	0.003895511140782523
GO:0007254	JNK cascade	BIOLOGICAL_PROCESS	1.0	0.006664125319583776
GO:0071824	protein-DNA complex subunit organization	BIOLOGICAL_PROCESS	1.0	0.005446599219632281
GO:1990446	U1 snRNP binding	MOLECULAR_FUNCTION	1.0	0.0072834869690927406
GO:0075519	microtubule-dependent intracellular transport of viral material	BIOLOGICAL_PROCESS	1.0	0.0072834869690927406
GO:0075521	microtubule-dependent intracellular transport of viral material towards nucleus	BIOLOGICAL_PROCESS	1.0	0.0072834869690927406

## Sheet: Cluster 4
Supplementary Table 3. Each sheet of the table represents the blast2GO enrichment list of the total marker genes defined for each of the transcriptomic clusters.
GO ID	GO Name	GO Category	FDR	P-value
GO:0006260	DNA replication	BIOLOGICAL_PROCESS	1.1819047987920123E-16	3.1414143673040106E-20
GO:0044260	cellular macromolecule metabolic process	BIOLOGICAL_PROCESS	2.4566855558893844E-14	1.3059372140813596E-17
GO:0051276	chromosome organization	BIOLOGICAL_PROCESS	1.3629918811497682E-13	8.453037271239813E-17
GO:0034641	cellular nitrogen compound metabolic process	BIOLOGICAL_PROCESS	2.5293424742173236E-12	2.4650276615921467E-15
GO:0006259	DNA metabolic process	BIOLOGICAL_PROCESS	3.2076144482984766E-12	3.694426138733073E-15
GO:0046483	heterocycle metabolic process	BIOLOGICAL_PROCESS	1.0814817798088409E-10	1.43724875495106E-13
GO:0006725	cellular aromatic compound metabolic process	BIOLOGICAL_PROCESS	1.106993883659035E-10	1.6361374348081053E-13
GO:0006139	nucleobase-containing compound metabolic process	BIOLOGICAL_PROCESS	1.106993883659035E-10	1.6673071695050584E-13
GO:0044237	cellular metabolic process	BIOLOGICAL_PROCESS	1.2076710710045938E-10	1.9259395125438724E-13
GO:0071103	DNA conformation change	BIOLOGICAL_PROCESS	1.4586893034453618E-10	2.458769127025254E-13
GO:0034645	cellular macromolecule biosynthetic process	BIOLOGICAL_PROCESS	1.4586893034453618E-10	2.675297638637727E-13
GO:1901360	organic cyclic compound metabolic process	BIOLOGICAL_PROCESS	1.5783348477258024E-10	3.3560765788446227E-13
GO:0006261	DNA-dependent DNA replication	BIOLOGICAL_PROCESS	1.759293955004986E-10	3.896726222656565E-13
GO:0071840	cellular component organization or biogenesis	BIOLOGICAL_PROCESS	9.095751607362482E-10	2.498168688121174E-12
GO:0043170	macromolecule metabolic process	BIOLOGICAL_PROCESS	8.245398825509324E-9	2.4837738997724547E-11
GO:0090304	nucleic acid metabolic process	BIOLOGICAL_PROCESS	1.3088512613166109E-8	4.0586333078835284E-11
GO:0044249	cellular biosynthetic process	BIOLOGICAL_PROCESS	1.5448335596453236E-8	4.927262173051444E-11
GO:0006807	nitrogen compound metabolic process	BIOLOGICAL_PROCESS	1.6234271318682447E-8	5.321768749811735E-11
GO:0071704	organic substance metabolic process	BIOLOGICAL_PROCESS	2.0667322140197716E-8	6.958077800367796E-11
GO:0006974	cellular response to DNA damage stimulus	BIOLOGICAL_PROCESS	2.267561615753736E-8	7.835111456932373E-11
GO:0016043	cellular component organization	BIOLOGICAL_PROCESS	2.9139659894768676E-8	1.0326804250826145E-10
GO:1901576	organic substance biosynthetic process	BIOLOGICAL_PROCESS	2.9433895747440134E-8	1.0691855458891162E-10
GO:0007049	cell cycle	BIOLOGICAL_PROCESS	4.33130420048206E-8	1.6500937416561406E-10
GO:0009058	biosynthetic process	BIOLOGICAL_PROCESS	5.6460849544720416E-8	2.2010076902345162E-10
GO:0009059	macromolecule biosynthetic process	BIOLOGICAL_PROCESS	1.2124460070680622E-7	4.927924323595248E-10
GO:0033554	cellular response to stress	BIOLOGICAL_PROCESS	1.6340002970305714E-7	6.804112160931766E-10
GO:0044238	primary metabolic process	BIOLOGICAL_PROCESS	1.9077024602010202E-7	8.281865912097988E-10
GO:0006281	DNA repair	BIOLOGICAL_PROCESS	3.484473746650507E-7	1.5435783408569624E-9
GO:0006996	organelle organization	BIOLOGICAL_PROCESS	5.30178111649926E-7	2.4425677155839594E-9
GO:0044085	cellular component biogenesis	BIOLOGICAL_PROCESS	6.047497749215474E-7	2.839703913426244E-9
GO:0006333	chromatin assembly or disassembly	BIOLOGICAL_PROCESS	1.0211383847594611E-6	4.885396719855666E-9
GO:0006270	DNA replication initiation	BIOLOGICAL_PROCESS	2.456205999095254E-6	1.2621595459158744E-8
GO:0006275	regulation of DNA replication	BIOLOGICAL_PROCESS	2.456205999095254E-6	1.2621595459158744E-8
GO:0008152	metabolic process	BIOLOGICAL_PROCESS	2.8759701965252277E-6	1.5033422662796884E-8
GO:0090329	regulation of DNA-dependent DNA replication	BIOLOGICAL_PROCESS	5.541606988964555E-6	2.945835202780839E-8
GO:0009157	deoxyribonucleoside monophosphate biosynthetic process	BIOLOGICAL_PROCESS	5.979549893346761E-6	3.39054835805965E-8
GO:0009124	nucleoside monophosphate biosynthetic process	BIOLOGICAL_PROCESS	9.342725931861142E-6	5.380324139018111E-8
GO:0009987	cellular process	BIOLOGICAL_PROCESS	1.0333556316329757E-5	6.042479993601169E-8
GO:0051052	regulation of DNA metabolic process	BIOLOGICAL_PROCESS	1.1675317121482478E-5	7.137387094731027E-8
GO:2000112	regulation of cellular macromolecule biosynthetic process	BIOLOGICAL_PROCESS	1.1693610266599148E-5	7.252172576078146E-8
GO:0022607	cellular component assembly	BIOLOGICAL_PROCESS	1.1832074465916738E-5	7.442874874458124E-8
GO:0009162	deoxyribonucleoside monophosphate metabolic process	BIOLOGICAL_PROCESS	1.2165884703226558E-5	7.868429018654547E-8
GO:0009123	nucleoside monophosphate metabolic process	BIOLOGICAL_PROCESS	2.1801517592822752E-5	1.429354391661986E-7
GO:0009263	deoxyribonucleotide biosynthetic process	BIOLOGICAL_PROCESS	4.1613989323582125E-5	2.802040567548721E-7
GO:0006950	response to stress	BIOLOGICAL_PROCESS	6.596783902518948E-5	4.5003310046421464E-7
GO:0030174	regulation of DNA-dependent DNA replication initiation	BIOLOGICAL_PROCESS	6.63616517036816E-5	4.644786466369139E-7
GO:0006323	DNA packaging	BIOLOGICAL_PROCESS	8.330880462989416E-5	5.904761557890965E-7
GO:0032508	DNA duplex unwinding	BIOLOGICAL_PROCESS	1.0662382812979232E-4	7.746215917996783E-7
GO:0006325	chromatin organization	BIOLOGICAL_PROCESS	1.1496830159218719E-4	8.454300551210718E-7
GO:0032392	DNA geometric change	BIOLOGICAL_PROCESS	1.348146317594624E-4	1.0033161218919855E-6
GO:0043933	protein-containing complex organization	BIOLOGICAL_PROCESS	3.270743842653045E-4	2.4921057009671466E-6
GO:0031497	chromatin assembly	BIOLOGICAL_PROCESS	3.893678890739211E-4	3.1397108826715786E-6
GO:0009219	pyrimidine deoxyribonucleotide metabolic process	BIOLOGICAL_PROCESS	3.893678890739211E-4	3.311714126968763E-6
GO:0009221	pyrimidine deoxyribonucleotide biosynthetic process	BIOLOGICAL_PROCESS	3.893678890739211E-4	3.311714126968763E-6
GO:0009265	2'-deoxyribonucleotide biosynthetic process	BIOLOGICAL_PROCESS	3.893678890739211E-4	3.311714126968763E-6
GO:0046385	deoxyribose phosphate biosynthetic process	BIOLOGICAL_PROCESS	3.893678890739211E-4	3.311714126968763E-6
GO:0009177	pyrimidine deoxyribonucleoside monophosphate biosynthetic process	BIOLOGICAL_PROCESS	3.893678890739211E-4	3.311714126968763E-6
GO:0009176	pyrimidine deoxyribonucleoside monophosphate metabolic process	BIOLOGICAL_PROCESS	3.893678890739211E-4	3.311714126968763E-6
GO:0051383	kinetochore organization	BIOLOGICAL_PROCESS	3.893678890739211E-4	3.311714126968763E-6
GO:0006268	DNA unwinding involved in DNA replication	BIOLOGICAL_PROCESS	3.893678890739211E-4	3.311714126968763E-6
GO:0044271	cellular nitrogen compound biosynthetic process	BIOLOGICAL_PROCESS	4.3701607896067565E-4	3.7556976751294E-6
GO:0065003	protein-containing complex assembly	BIOLOGICAL_PROCESS	5.325387363218356E-4	4.623796948661281E-6
GO:0022613	ribonucleoprotein complex biogenesis	BIOLOGICAL_PROCESS	5.488214409940117E-4	4.81379663846967E-6
GO:0072527	pyrimidine-containing compound metabolic process	BIOLOGICAL_PROCESS	5.535393413803901E-4	4.904220265618766E-6
GO:0006284	base-excision repair	BIOLOGICAL_PROCESS	5.663575663207934E-4	5.0679644013821325E-6
GO:0009262	deoxyribonucleotide metabolic process	BIOLOGICAL_PROCESS	0.002000180618286508	1.8252733559272646E-5
GO:0040029	regulation of gene expression, epigenetic	BIOLOGICAL_PROCESS	0.0026957672570246598	2.579453032326245E-5
GO:0034508	centromere complex assembly	BIOLOGICAL_PROCESS	0.002796446306222794	2.7253397154647587E-5
GO:0051262	protein tetramerization	BIOLOGICAL_PROCESS	0.0030830699100731253	3.031990431630344E-5
GO:0006220	pyrimidine nucleotide metabolic process	BIOLOGICAL_PROCESS	0.0035360126633555014	3.540085327892014E-5
GO:0006221	pyrimidine nucleotide biosynthetic process	BIOLOGICAL_PROCESS	0.0035360126633555014	3.540085327892014E-5
GO:0090305	nucleic acid phosphodiester bond hydrolysis	BIOLOGICAL_PROCESS	0.0037296655031176366	3.7670051152246884E-5
GO:0043137	DNA replication, removal of RNA primer	BIOLOGICAL_PROCESS	0.004647773214724843	4.8590169162534906E-5
GO:0009165	nucleotide biosynthetic process	BIOLOGICAL_PROCESS	0.004691215483916802	4.945996656207136E-5
GO:1901293	nucleoside phosphate biosynthetic process	BIOLOGICAL_PROCESS	0.00483190669922048	5.137138335310158E-5
GO:0000413	protein peptidyl-prolyl isomerization	BIOLOGICAL_PROCESS	0.005073552393739083	5.4389991994544976E-5
GO:0072528	pyrimidine-containing compound biosynthetic process	BIOLOGICAL_PROCESS	0.0057462876906614275	6.211102137509472E-5
GO:0009129	pyrimidine nucleoside monophosphate metabolic process	BIOLOGICAL_PROCESS	0.006398001101812187	7.028901715466565E-5
GO:0009130	pyrimidine nucleoside monophosphate biosynthetic process	BIOLOGICAL_PROCESS	0.006398001101812187	7.028901715466565E-5
GO:0000278	mitotic cell cycle	BIOLOGICAL_PROCESS	0.007934658033160909	9.138881406139082E-5
GO:0006457	protein folding	BIOLOGICAL_PROCESS	0.008583786286885773	1.0024530609305623E-4
GO:0018208	peptidyl-proline modification	BIOLOGICAL_PROCESS	0.008583786286885773	1.0114676850853263E-4
GO:0000387	spliceosomal snRNP assembly	BIOLOGICAL_PROCESS	0.009695991430208644	1.1511144251333022E-4
GO:0043412	macromolecule modification	BIOLOGICAL_PROCESS	0.009870301460334139	1.1805534660628234E-4
GO:0031507	heterochromatin assembly	BIOLOGICAL_PROCESS	0.011217525271673245	1.4315472416800675E-4
GO:0016570	histone modification	BIOLOGICAL_PROCESS	0.011217525271673245	1.426841575395699E-4
GO:0034723	DNA replication-dependent chromatin organization	BIOLOGICAL_PROCESS	0.011217525271673245	1.451013280468055E-4
GO:0006335	DNA replication-dependent chromatin assembly	BIOLOGICAL_PROCESS	0.011217525271673245	1.451013280468055E-4
GO:0070828	heterochromatin organization	BIOLOGICAL_PROCESS	0.011217525271673245	1.4315472416800675E-4
GO:0045814	negative regulation of gene expression, epigenetic	BIOLOGICAL_PROCESS	0.013190080112486935	1.7529122148250554E-4
GO:0007059	chromosome segregation	BIOLOGICAL_PROCESS	0.014371412588647135	1.9226395861484164E-4
GO:0009117	nucleotide metabolic process	BIOLOGICAL_PROCESS	0.014397324504114338	1.9388618097150522E-4
GO:0006753	nucleoside phosphate metabolic process	BIOLOGICAL_PROCESS	0.015321931293679687	2.0942441250125878E-4
GO:0019692	deoxyribose phosphate metabolic process	BIOLOGICAL_PROCESS	0.015321931293679687	2.117676337214522E-4
GO:0009394	2'-deoxyribonucleotide metabolic process	BIOLOGICAL_PROCESS	0.015321931293679687	2.117676337214522E-4
GO:0018193	peptidyl-amino acid modification	BIOLOGICAL_PROCESS	0.015321931293679687	2.0942441250125878E-4
GO:0010467	gene expression	BIOLOGICAL_PROCESS	0.017167365120367508	2.3879474828543447E-4
GO:0019438	aromatic compound biosynthetic process	BIOLOGICAL_PROCESS	0.01791573002961145	2.507916492140169E-4
GO:0051259	protein complex oligomerization	BIOLOGICAL_PROCESS	0.01829368786066691	2.593240061758399E-4
GO:0009451	RNA modification	BIOLOGICAL_PROCESS	0.019253217305509093	2.746316989622543E-4
GO:0046073	dTMP metabolic process	BIOLOGICAL_PROCESS	0.019641498177400168	2.888711524274323E-4
GO:0051382	kinetochore assembly	BIOLOGICAL_PROCESS	0.019641498177400168	2.888711524274323E-4
GO:0006231	dTMP biosynthetic process	BIOLOGICAL_PROCESS	0.019641498177400168	2.888711524274323E-4
GO:0018130	heterocycle biosynthetic process	BIOLOGICAL_PROCESS	0.019803509893039407	2.9300843024165685E-4
GO:0065004	protein-DNA complex assembly	BIOLOGICAL_PROCESS	0.0199581551033316	2.9706476985556026E-4
GO:1901362	organic cyclic compound biosynthetic process	BIOLOGICAL_PROCESS	0.02437713015242845	3.7363723898025357E-4
GO:0071824	protein-DNA complex subunit organization	BIOLOGICAL_PROCESS	0.024618420475585278	3.795167150484485E-4
GO:0044267	cellular protein metabolic process	BIOLOGICAL_PROCESS	0.026805544572838996	4.1560824844926234E-4
GO:0001522	pseudouridine synthesis	BIOLOGICAL_PROCESS	0.029478117893568828	4.6749207964461953E-4
GO:0034654	nucleobase-containing compound biosynthetic process	BIOLOGICAL_PROCESS	0.029478117893568828	4.629728379043139E-4
GO:0051290	protein heterotetramerization	BIOLOGICAL_PROCESS	0.029721034528937925	4.792441113020911E-4
GO:0090407	organophosphate biosynthetic process	BIOLOGICAL_PROCESS	0.03131348115410463	5.160190922887801E-4
GO:0000398	mRNA splicing, via spliceosome	BIOLOGICAL_PROCESS	0.03381266183434665	5.691862982657804E-4
GO:0000377	RNA splicing, via transesterification reactions with bulged adenosine as nucleophile	BIOLOGICAL_PROCESS	0.03381266183434665	5.691862982657804E-4
GO:0006473	protein acetylation	BIOLOGICAL_PROCESS	0.03472200189141121	5.914832101247571E-4
GO:0000375	RNA splicing, via transesterification reactions	BIOLOGICAL_PROCESS	0.03472200189141121	5.967988275833947E-4
GO:0018205	peptidyl-lysine modification	BIOLOGICAL_PROCESS	0.03601500541785152	6.254045416761671E-4
GO:0043543	protein acylation	BIOLOGICAL_PROCESS	0.036299654899433875	6.335635700530232E-4
GO:0006302	double-strand break repair	BIOLOGICAL_PROCESS	0.03863367969723001	6.77723804381283E-4
GO:0060255	regulation of macromolecule metabolic process	BIOLOGICAL_PROCESS	0.03935718397431607	6.973896336372121E-4
GO:0006474	N-terminal protein amino acid acetylation	BIOLOGICAL_PROCESS	0.03998343789278799	7.155714055411689E-4
GO:0016070	RNA metabolic process	BIOLOGICAL_PROCESS	0.04313483207765137	7.757925854313129E-4
GO:0042440	pigment metabolic process	BIOLOGICAL_PROCESS	0.04742536606461091	8.655644023487063E-4
GO:0006397	mRNA processing	BIOLOGICAL_PROCESS	0.04742536606461091	8.590546170963759E-4
GO:0098813	nuclear chromosome segregation	BIOLOGICAL_PROCESS	0.05080320883028187	9.317147362335736E-4
GO:0035999	tetrahydrofolate interconversion	BIOLOGICAL_PROCESS	0.05309207315267488	9.97210907093743E-4
GO:0034724	DNA replication-independent chromatin organization	BIOLOGICAL_PROCESS	0.05309207315267488	9.97210907093743E-4
GO:0016925	protein sumoylation	BIOLOGICAL_PROCESS	0.05309207315267488	9.97210907093743E-4
GO:0006336	DNA replication-independent chromatin assembly	BIOLOGICAL_PROCESS	0.05309207315267488	9.97210907093743E-4
GO:0022402	cell cycle process	BIOLOGICAL_PROCESS	0.05534018109223377	0.0010443393791659248
GO:0140694	non-membrane-bounded organelle assembly	BIOLOGICAL_PROCESS	0.055621503837279165	0.0010545762223068788
GO:0060041	retina development in camera-type eye	BIOLOGICAL_PROCESS	0.056069127090476886	0.001070323037621478
GO:0055086	nucleobase-containing small molecule metabolic process	BIOLOGICAL_PROCESS	0.056069127090476886	0.0010729982680555514
GO:0150063	visual system development	BIOLOGICAL_PROCESS	0.05761111202725207	0.0011127157280004386
GO:0001654	eye development	BIOLOGICAL_PROCESS	0.05761111202725207	0.0011127157280004386
GO:1901566	organonitrogen compound biosynthetic process	BIOLOGICAL_PROCESS	0.0640457258143998	0.0012516314145328005
GO:1903047	mitotic cell cycle process	BIOLOGICAL_PROCESS	0.0640457258143998	0.0012540183755632458
GO:0031365	N-terminal protein amino acid modification	BIOLOGICAL_PROCESS	0.06639400160549792	0.0013235270985414223
GO:0045815	epigenetic maintenance of chromatin in transcription-competent conformation	BIOLOGICAL_PROCESS	0.06639400160549792	0.0013235270985414223
GO:0019222	regulation of metabolic process	BIOLOGICAL_PROCESS	0.06699005141495726	0.0013413441676070116
GO:0042254	ribosome biogenesis	BIOLOGICAL_PROCESS	0.06819662727328175	0.0013715455294617666
GO:0048880	sensory system development	BIOLOGICAL_PROCESS	0.06854130119605882	0.0013906226609282778
GO:0140718	facultative heterochromatin assembly	BIOLOGICAL_PROCESS	0.08101249095756756	0.0016938910131997825
GO:0016575	histone deacetylation	BIOLOGICAL_PROCESS	0.08101249095756756	0.0016938910131997825
GO:0009113	purine nucleobase biosynthetic process	BIOLOGICAL_PROCESS	0.08101249095756756	0.0016938910131997825
GO:0051291	protein heterooligomerization	BIOLOGICAL_PROCESS	0.08101249095756756	0.0016938910131997825
GO:0010628	positive regulation of gene expression	BIOLOGICAL_PROCESS	0.08126945803149246	0.0017136644822800752
GO:1901564	organonitrogen compound metabolic process	BIOLOGICAL_PROCESS	0.09039215705463624	0.0019300531452261305
GO:0006464	cellular protein modification process	BIOLOGICAL_PROCESS	0.09405348240930123	0.0020248955635208824
GO:0036211	protein modification process	BIOLOGICAL_PROCESS	0.09405348240930123	0.0020248955635208824
GO:0008380	RNA splicing	BIOLOGICAL_PROCESS	0.09545472964826933	0.002063520336154666
GO:2001020	regulation of response to DNA damage stimulus	BIOLOGICAL_PROCESS	0.09670482173033712	0.0021076801759247745
GO:0006396	RNA processing	BIOLOGICAL_PROCESS	0.11137541065793535	0.0024570281964938338
GO:0046653	tetrahydrofolate metabolic process	BIOLOGICAL_PROCESS	0.11394886586042183	0.00256427854421433
GO:0046683	response to organophosphorus	BIOLOGICAL_PROCESS	0.11394886586042183	0.00256427854421433
GO:0006289	nucleotide-excision repair	BIOLOGICAL_PROCESS	0.11394886586042183	0.0025441971359342944
GO:0010556	regulation of macromolecule biosynthetic process	BIOLOGICAL_PROCESS	0.11470201221523715	0.0025913894847953817
GO:0032259	methylation	BIOLOGICAL_PROCESS	0.11904109354709638	0.0027074730645810737
GO:0019637	organophosphate metabolic process	BIOLOGICAL_PROCESS	0.12320233488974654	0.0028380089546676795
GO:0031326	regulation of cellular biosynthetic process	BIOLOGICAL_PROCESS	0.12991119756249314	0.003036084900657009
GO:0009127	purine nucleoside monophosphate biosynthetic process	BIOLOGICAL_PROCESS	0.12991119756249314	0.0030630764497847555
GO:0009168	purine ribonucleoside monophosphate biosynthetic process	BIOLOGICAL_PROCESS	0.12991119756249314	0.0030630764497847555
GO:0046112	nucleobase biosynthetic process	BIOLOGICAL_PROCESS	0.12991119756249314	0.0030630764497847555
GO:0006310	DNA recombination	BIOLOGICAL_PROCESS	0.1313410202228733	0.0031185783130796532
GO:0022618	ribonucleoprotein complex assembly	BIOLOGICAL_PROCESS	0.135922206757032	0.003251439339452347
GO:0071826	ribonucleoprotein complex subunit organization	BIOLOGICAL_PROCESS	0.135922206757032	0.003251439339452347
GO:0009889	regulation of biosynthetic process	BIOLOGICAL_PROCESS	0.1388937394719306	0.0033448316141036966
GO:0000070	mitotic sister chromatid segregation	BIOLOGICAL_PROCESS	0.1388937394719306	0.003366544384567507
GO:0006476	protein deacetylation	BIOLOGICAL_PROCESS	0.1468316678361812	0.003603470540499884
GO:0000154	rRNA modification	BIOLOGICAL_PROCESS	0.1468316678361812	0.003603470540499884
GO:0051171	regulation of nitrogen compound metabolic process	BIOLOGICAL_PROCESS	0.149121960289946	0.003686101437130764
GO:0080135	regulation of cellular response to stress	BIOLOGICAL_PROCESS	0.15282825983767126	0.003831877162581817
GO:0016573	histone acetylation	BIOLOGICAL_PROCESS	0.16095782863010888	0.004078491980881646
GO:0033044	regulation of chromosome organization	BIOLOGICAL_PROCESS	0.16095782863010888	0.004078491980881646
GO:0006338	chromatin remodeling	BIOLOGICAL_PROCESS	0.16095782863010888	0.004078491980881646
GO:0000470	maturation of LSU-rRNA	BIOLOGICAL_PROCESS	0.16344137315877177	0.004184863723122623
GO:0048513	animal organ development	BIOLOGICAL_PROCESS	0.16528406144437696	0.004312014365414069
GO:0006413	translational initiation	BIOLOGICAL_PROCESS	0.16528406144437696	0.004290998605621873
GO:0006417	regulation of translation	BIOLOGICAL_PROCESS	0.16528406144437696	0.004290998605621873
GO:0006475	internal protein amino acid acetylation	BIOLOGICAL_PROCESS	0.16528406144437696	0.004334551447464834
GO:0018393	internal peptidyl-lysine acetylation	BIOLOGICAL_PROCESS	0.16528406144437696	0.004334551447464834
GO:0000819	sister chromatid segregation	BIOLOGICAL_PROCESS	0.16528406144437696	0.004334551447464834
GO:0043010	camera-type eye development	BIOLOGICAL_PROCESS	0.16528406144437696	0.004334551447464834
GO:0006760	folic acid-containing compound metabolic process	BIOLOGICAL_PROCESS	0.18024195704531742	0.004806665107702715
GO:0035601	protein deacylation	BIOLOGICAL_PROCESS	0.18024195704531742	0.004806665107702715
GO:0018394	peptidyl-lysine acetylation	BIOLOGICAL_PROCESS	0.1822147734791476	0.004875419650102116
GO:0036492	eiF2alpha phosphorylation in response to endoplasmic reticulum stress	BIOLOGICAL_PROCESS	0.18853804151068126	0.006998975759101219
GO:0036490	regulation of translation in response to endoplasmic reticulum stress	BIOLOGICAL_PROCESS	0.18853804151068126	0.006998975759101219
GO:0036491	regulation of translation initiation in response to endoplasmic reticulum stress	BIOLOGICAL_PROCESS	0.18853804151068126	0.006998975759101219
GO:0098732	macromolecule deacylation	BIOLOGICAL_PROCESS	0.18853804151068126	0.005468289948514728
GO:0016059	deactivation of rhodopsin mediated signaling	BIOLOGICAL_PROCESS	0.18853804151068126	0.006998975759101219
GO:0043555	regulation of translation in response to stress	BIOLOGICAL_PROCESS	0.18853804151068126	0.006998975759101219
GO:0043558	regulation of translational initiation in response to stress	BIOLOGICAL_PROCESS	0.18853804151068126	0.006998975759101219
GO:0000494	box C/D RNA 3'-end processing	BIOLOGICAL_PROCESS	0.18853804151068126	0.006998975759101219
GO:1903755	positive regulation of SUMO transferase activity	BIOLOGICAL_PROCESS	0.18853804151068126	0.006998975759101219
GO:0006788	heme oxidation	BIOLOGICAL_PROCESS	0.18853804151068126	0.006998975759101219
GO:0120263	positive regulation of heterochromatin organization	BIOLOGICAL_PROCESS	0.18853804151068126	0.006998975759101219
GO:0016060	metarhodopsin inactivation	BIOLOGICAL_PROCESS	0.18853804151068126	0.006998975759101219
GO:0016061	regulation of light-activated channel activity	BIOLOGICAL_PROCESS	0.18853804151068126	0.006998975759101219
GO:0016062	adaptation of rhodopsin mediated signaling	BIOLOGICAL_PROCESS	0.18853804151068126	0.006998975759101219
GO:0006412	translation	BIOLOGICAL_PROCESS	0.18853804151068126	0.006721786913753087
GO:0006452	translational frameshifting	BIOLOGICAL_PROCESS	0.18853804151068126	0.006998975759101219
GO:0042052	rhabdomere development	BIOLOGICAL_PROCESS	0.18853804151068126	0.006998975759101219
GO:0031323	regulation of cellular metabolic process	BIOLOGICAL_PROCESS	0.18853804151068126	0.006554932286452297
GO:0036367	light adaption	BIOLOGICAL_PROCESS	0.18853804151068126	0.006998975759101219
GO:0031453	positive regulation of heterochromatin assembly	BIOLOGICAL_PROCESS	0.18853804151068126	0.006998975759101219
GO:0040031	snRNA modification	BIOLOGICAL_PROCESS	0.18853804151068126	0.006998975759101219
GO:0090309	positive regulation of DNA methylation-dependent heterochromatin assembly	BIOLOGICAL_PROCESS	0.18853804151068126	0.006998975759101219
GO:0009213	pyrimidine deoxyribonucleoside triphosphate catabolic process	BIOLOGICAL_PROCESS	0.18853804151068126	0.006998975759101219
GO:0009223	pyrimidine deoxyribonucleotide catabolic process	BIOLOGICAL_PROCESS	0.18853804151068126	0.006998975759101219
GO:0034248	regulation of cellular amide metabolic process	BIOLOGICAL_PROCESS	0.18853804151068126	0.005157466363536245
GO:1900262	regulation of DNA-directed DNA polymerase activity	BIOLOGICAL_PROCESS	0.18853804151068126	0.006998975759101219
GO:1900264	positive regulation of DNA-directed DNA polymerase activity	BIOLOGICAL_PROCESS	0.18853804151068126	0.006998975759101219
GO:0046084	adenine biosynthetic process	BIOLOGICAL_PROCESS	0.18853804151068126	0.006998975759101219
GO:0046083	adenine metabolic process	BIOLOGICAL_PROCESS	0.18853804151068126	0.006998975759101219
GO:0046080	dUTP metabolic process	BIOLOGICAL_PROCESS	0.18853804151068126	0.006998975759101219
GO:0046081	dUTP catabolic process	BIOLOGICAL_PROCESS	0.18853804151068126	0.006998975759101219
GO:0072499	photoreceptor cell axon guidance	BIOLOGICAL_PROCESS	0.18853804151068126	0.006998975759101219
GO:0043967	histone H4 acetylation	BIOLOGICAL_PROCESS	0.18853804151068126	0.005468289948514728
GO:0009126	purine nucleoside monophosphate metabolic process	BIOLOGICAL_PROCESS	0.18853804151068126	0.005468289948514728
GO:0009167	purine ribonucleoside monophosphate metabolic process	BIOLOGICAL_PROCESS	0.18853804151068126	0.005468289948514728
GO:0009149	pyrimidine nucleoside triphosphate catabolic process	BIOLOGICAL_PROCESS	0.18853804151068126	0.006998975759101219
GO:0009147	pyrimidine nucleoside triphosphate metabolic process	BIOLOGICAL_PROCESS	0.18853804151068126	0.005468289948514728
GO:1990258	histone glutamine methylation	BIOLOGICAL_PROCESS	0.18853804151068126	0.006998975759101219
GO:0010660	regulation of muscle cell apoptotic process	BIOLOGICAL_PROCESS	0.18853804151068126	0.006998975759101219
GO:0010659	cardiac muscle cell apoptotic process	BIOLOGICAL_PROCESS	0.18853804151068126	0.006998975759101219
GO:0010658	striated muscle cell apoptotic process	BIOLOGICAL_PROCESS	0.18853804151068126	0.006998975759101219
GO:0010657	muscle cell apoptotic process	BIOLOGICAL_PROCESS	0.18853804151068126	0.006998975759101219
GO:0010666	positive regulation of cardiac muscle cell apoptotic process	BIOLOGICAL_PROCESS	0.18853804151068126	0.006998975759101219
GO:0010665	regulation of cardiac muscle cell apoptotic process	BIOLOGICAL_PROCESS	0.18853804151068126	0.006998975759101219
GO:0010662	regulation of striated muscle cell apoptotic process	BIOLOGICAL_PROCESS	0.18853804151068126	0.006998975759101219
GO:0010661	positive regulation of muscle cell apoptotic process	BIOLOGICAL_PROCESS	0.18853804151068126	0.006998975759101219
GO:0010663	positive regulation of striated muscle cell apoptotic process	BIOLOGICAL_PROCESS	0.18853804151068126	0.006998975759101219
GO:0032055	negative regulation of translation in response to stress	BIOLOGICAL_PROCESS	0.18853804151068126	0.006998975759101219
GO:0046655	folic acid metabolic process	BIOLOGICAL_PROCESS	0.18853804151068126	0.006998975759101219
GO:0032070	regulation of deoxyribonuclease activity	BIOLOGICAL_PROCESS	0.18853804151068126	0.006998975759101219
GO:0032077	positive regulation of deoxyribonuclease activity	BIOLOGICAL_PROCESS	0.18853804151068126	0.006998975759101219
GO:0032075	positive regulation of nuclease activity	BIOLOGICAL_PROCESS	0.18853804151068126	0.006998975759101219
GO:0010835	regulation of protein ADP-ribosylation	BIOLOGICAL_PROCESS	0.18853804151068126	0.006998975759101219
GO:0070417	cellular response to cold	BIOLOGICAL_PROCESS	0.18853804151068126	0.006998975759101219
GO:0009642	response to light intensity	BIOLOGICAL_PROCESS	0.18853804151068126	0.006998975759101219
GO:1905269	positive regulation of chromatin organization	BIOLOGICAL_PROCESS	0.18853804151068126	0.006998975759101219
GO:0006244	pyrimidine nucleotide catabolic process	BIOLOGICAL_PROCESS	0.18853804151068126	0.006998975759101219
GO:0031120	snRNA pseudouridine synthesis	BIOLOGICAL_PROCESS	0.18853804151068126	0.006998975759101219
GO:0031118	rRNA pseudouridine synthesis	BIOLOGICAL_PROCESS	0.18853804151068126	0.006998975759101219
GO:0006144	purine nucleobase metabolic process	BIOLOGICAL_PROCESS	0.18853804151068126	0.006908701412473708
GO:0045799	positive regulation of chromatin assembly or disassembly	BIOLOGICAL_PROCESS	0.18853804151068126	0.006998975759101219
GO:0006334	nucleosome assembly	BIOLOGICAL_PROCESS	0.18853804151068126	0.005468289948514728
GO:0045943	positive regulation of transcription by RNA polymerase I	BIOLOGICAL_PROCESS	0.18853804151068126	0.006998975759101219
GO:0033967	box C/D RNA metabolic process	BIOLOGICAL_PROCESS	0.18853804151068126	0.006998975759101219
GO:0045905	positive regulation of translational termination	BIOLOGICAL_PROCESS	0.18853804151068126	0.006998975759101219
GO:0045901	positive regulation of translational elongation	BIOLOGICAL_PROCESS	0.18853804151068126	0.006998975759101219
GO:0006356	regulation of transcription by RNA polymerase I	BIOLOGICAL_PROCESS	0.18853804151068126	0.006998975759101219
GO:0006298	mismatch repair	BIOLOGICAL_PROCESS	0.18853804151068126	0.005468289948514728
GO:1903182	regulation of SUMO transferase activity	BIOLOGICAL_PROCESS	0.18853804151068126	0.006998975759101219
GO:0080090	regulation of primary metabolic process	BIOLOGICAL_PROCESS	0.18853804151068126	0.005307452490766324
GO:0007423	sensory organ development	BIOLOGICAL_PROCESS	0.18853804151068126	0.005729848867803478
GO:1904482	cellular response to tetrahydrofolate	BIOLOGICAL_PROCESS	0.18853804151068126	0.006998975759101219
GO:1904481	response to tetrahydrofolate	BIOLOGICAL_PROCESS	0.18853804151068126	0.006998975759101219
GO:0034963	box C/D RNA processing	BIOLOGICAL_PROCESS	0.18853804151068126	0.006998975759101219
GO:0010998	regulation of translational initiation by eIF2 alpha phosphorylation	BIOLOGICAL_PROCESS	0.18853804151068126	0.006998975759101219
GO:0071962	mitotic sister chromatid cohesion, centromeric	BIOLOGICAL_PROCESS	0.18853804151068126	0.006998975759101219
GO:0071897	DNA biosynthetic process	BIOLOGICAL_PROCESS	0.19999064651209916	0.007459560749676066
GO:0016071	mRNA metabolic process	BIOLOGICAL_PROCESS	0.20258980585423253	0.007574457169352895
GO:0034728	nucleosome organization	BIOLOGICAL_PROCESS	0.20461277971092187	0.007686348772696985
GO:0051301	cell division	BIOLOGICAL_PROCESS	0.21034470779075687	0.007940115243660891
GO:0046700	heterocycle catabolic process	BIOLOGICAL_PROCESS	0.21034470779075687	0.007957578650363532
GO:0043043	peptide biosynthetic process	BIOLOGICAL_PROCESS	0.2120909144211731	0.008042430351046521
GO:1901137	carbohydrate derivative biosynthetic process	BIOLOGICAL_PROCESS	0.21551728075156398	0.008191451532065292
GO:0051054	positive regulation of DNA metabolic process	BIOLOGICAL_PROCESS	0.22315556453412283	0.008501540954166104
GO:0044270	cellular nitrogen compound catabolic process	BIOLOGICAL_PROCESS	0.22328440141387146	0.008526231683297475
GO:0000280	nuclear division	BIOLOGICAL_PROCESS	0.2341352480667147	0.00896132073755832
GO:0000731	DNA synthesis involved in DNA repair	BIOLOGICAL_PROCESS	0.24326145797015097	0.00935372311145969
GO:0019439	aromatic compound catabolic process	BIOLOGICAL_PROCESS	0.2529050561539942	0.009746938905553955
GO:1901361	organic cyclic compound catabolic process	BIOLOGICAL_PROCESS	0.2572886405089581	0.009961472127439948
GO:0005694	chromosome	CELLULAR_COMPONENT	1.0065341141288534E-20	8.917640773711823E-25
GO:0005634	nucleus	CELLULAR_COMPONENT	3.722191850526418E-18	6.595537964962201E-22
GO:0043226	organelle	CELLULAR_COMPONENT	2.1715008346070306E-15	7.69558194243654E-19
GO:0043229	intracellular organelle	CELLULAR_COMPONENT	6.152798600503269E-15	2.7256129177386677E-18
GO:0005622	intracellular anatomical structure	CELLULAR_COMPONENT	3.2190429200941234E-13	2.2815932808321953E-16
GO:0043231	intracellular membrane-bounded organelle	CELLULAR_COMPONENT	4.77961715775315E-13	3.8111592469015995E-16
GO:0043227	membrane-bounded organelle	CELLULAR_COMPONENT	4.380284835552481E-12	5.433152095130216E-15
GO:0043228	non-membrane-bounded organelle	CELLULAR_COMPONENT	1.4586893034453618E-10	2.8431970121199577E-13
GO:0043232	intracellular non-membrane-bounded organelle	CELLULAR_COMPONENT	1.4586893034453618E-10	2.8431970121199577E-13
GO:0032991	protein-containing complex	CELLULAR_COMPONENT	1.4838787166498333E-10	3.0237627786786713E-13
GO:0098687	chromosomal region	CELLULAR_COMPONENT	2.650334264035849E-10	6.809576827947163E-13
GO:0042555	MCM complex	CELLULAR_COMPONENT	7.297052525165317E-9	2.1334520539599137E-11
GO:0005657	replication fork	CELLULAR_COMPONENT	1.2124460070680622E-7	4.94130560158863E-10
GO:0000785	chromatin	CELLULAR_COMPONENT	1.6340974722667916E-7	6.949293759972179E-10
GO:0005732	sno(s)RNA-containing ribonucleoprotein complex	CELLULAR_COMPONENT	4.2199065452338587E-7	1.9067532010891008E-9
GO:0005663	DNA replication factor C complex	CELLULAR_COMPONENT	2.3319736903697324E-6	1.136338734564856E-8
GO:0031981	nuclear lumen	CELLULAR_COMPONENT	2.3603024379916464E-6	1.1710546338932595E-8
GO:0070013	intracellular organelle lumen	CELLULAR_COMPONENT	5.680152817183686E-6	3.1704582925717395E-8
GO:0031974	membrane-enclosed lumen	CELLULAR_COMPONENT	5.680152817183686E-6	3.1704582925717395E-8
GO:0043233	organelle lumen	CELLULAR_COMPONENT	5.680152817183686E-6	3.1704582925717395E-8
GO:0000781	chromosome, telomeric region	CELLULAR_COMPONENT	1.117511218492518E-5	6.63358302817389E-8
GO:0005654	nucleoplasm	CELLULAR_COMPONENT	2.6351062313602973E-5	1.7509787131392069E-7
GO:0000792	heterochromatin	CELLULAR_COMPONENT	6.63616517036816E-5	4.644786466369139E-7
GO:0000775	chromosome, centromeric region	CELLULAR_COMPONENT	3.475545689242769E-4	2.6789445819449E-6
GO:0019013	viral nucleocapsid	CELLULAR_COMPONENT	0.0018659527056691218	1.6862512268827006E-5
GO:0019028	viral capsid	CELLULAR_COMPONENT	0.0022606708224157212	2.0830137816181006E-5
GO:0140513	nuclear protein-containing complex	CELLULAR_COMPONENT	0.002456308489568877	2.297199982279692E-5
GO:0000793	condensed chromosome	CELLULAR_COMPONENT	0.002456308489568877	2.3068016292575616E-5
GO:0044423	virion component	CELLULAR_COMPONENT	0.0026886699133683275	2.5488409739559763E-5
GO:0005685	U1 snRNP	CELLULAR_COMPONENT	0.002796446306222794	2.7253397154647587E-5
GO:1990904	ribonucleoprotein complex	CELLULAR_COMPONENT	0.004430320896696278	4.553178205163181E-5
GO:0032299	ribonuclease H2 complex	CELLULAR_COMPONENT	0.004647773214724843	4.8590169162534906E-5
GO:0000228	nuclear chromosome	CELLULAR_COMPONENT	0.007100940803332524	7.864070172911894E-5
GO:0097526	spliceosomal tri-snRNP complex	CELLULAR_COMPONENT	0.007934658033160909	9.090895106443136E-5
GO:0097525	spliceosomal snRNP complex	CELLULAR_COMPONENT	0.008583786286885773	1.0114676850853263E-4
GO:0030532	small nuclear ribonucleoprotein complex	CELLULAR_COMPONENT	0.010474669726399303	1.2621202115622443E-4
GO:0031428	box C/D RNP complex	CELLULAR_COMPONENT	0.011217525271673245	1.451013280468055E-4
GO:0034715	pICln-Sm protein complex	CELLULAR_COMPONENT	0.011217525271673245	1.451013280468055E-4
GO:0120114	Sm-like protein family complex	CELLULAR_COMPONENT	0.011939148491380131	1.554934728654983E-4
GO:0071011	precatalytic spliceosome	CELLULAR_COMPONENT	0.013190080112486935	1.7529122148250554E-4
GO:0000776	kinetochore	CELLULAR_COMPONENT	0.01794739580967743	2.5282501406385325E-4
GO:0008622	epsilon DNA polymerase complex	CELLULAR_COMPONENT	0.019641498177400168	2.888711524274323E-4
GO:1902494	catalytic complex	CELLULAR_COMPONENT	0.027642683253200278	4.3103679033961633E-4
GO:0000779	condensed chromosome, centromeric region	CELLULAR_COMPONENT	0.029478117893568828	4.6749207964461953E-4
GO:0005687	U4 snRNP	CELLULAR_COMPONENT	0.029721034528937925	4.792441113020911E-4
GO:0140535	intracellular protein-containing complex	CELLULAR_COMPONENT	0.030010126215716776	4.918821077263758E-4
GO:0005829	cytosol	CELLULAR_COMPONENT	0.03472200189141121	5.937386410244999E-4
GO:0034719	SMN-Sm protein complex	CELLULAR_COMPONENT	0.03998343789278799	7.155714055411689E-4
GO:0032993	protein-DNA complex	CELLULAR_COMPONENT	0.04742536606461091	8.655644023487063E-4
GO:0042575	DNA polymerase complex	CELLULAR_COMPONENT	0.05309207315267488	9.97210907093743E-4
GO:0005737	cytoplasm	CELLULAR_COMPONENT	0.06129713405360089	0.0011893392715281825
GO:0005681	spliceosomal complex	CELLULAR_COMPONENT	0.10915768458815527	0.002398432336126739
GO:0005689	U12-type spliceosomal complex	CELLULAR_COMPONENT	0.11394886586042183	0.00256427854421433
GO:0046540	U4/U6 x U5 tri-snRNP complex	CELLULAR_COMPONENT	0.11394886586042183	0.00256427854421433
GO:1990234	transferase complex	CELLULAR_COMPONENT	0.12388825962575785	0.002864785661586143
GO:0005682	U5 snRNP	CELLULAR_COMPONENT	0.12991119756249314	0.0030630764497847555
GO:0070062	extracellular exosome	CELLULAR_COMPONENT	0.14472557545047846	0.0035261392087252213
GO:1903561	extracellular vesicle	CELLULAR_COMPONENT	0.14953661396520251	0.0037095997085369635
GO:0065010	extracellular membrane-bounded organelle	CELLULAR_COMPONENT	0.150988470272601	0.003772370746599937
GO:0043230	extracellular organelle	CELLULAR_COMPONENT	0.150988470272601	0.003772370746599937
GO:0005686	U2 snRNP	CELLULAR_COMPONENT	0.16344137315877177	0.004184863723122623
GO:0005840	ribosome	CELLULAR_COMPONENT	0.17529758730486478	0.004637019359673496
GO:0043626	PCNA complex	CELLULAR_COMPONENT	0.18853804151068126	0.006998975759101219
GO:0016028	rhabdomere	CELLULAR_COMPONENT	0.18853804151068126	0.006998975759101219
GO:0000444	MIS12/MIND type complex	CELLULAR_COMPONENT	0.18853804151068126	0.006998975759101219
GO:0150005	enzyme activator complex	CELLULAR_COMPONENT	0.18853804151068126	0.006998975759101219
GO:0070993	translation preinitiation complex	CELLULAR_COMPONENT	0.18853804151068126	0.006169159590438571
GO:0044815	DNA packaging complex	CELLULAR_COMPONENT	0.18853804151068126	0.006908701412473708
GO:0044796	DNA polymerase processivity factor complex	CELLULAR_COMPONENT	0.18853804151068126	0.006998975759101219
GO:0031475	myosin V complex	CELLULAR_COMPONENT	0.18853804151068126	0.006998975759101219
GO:0031476	myosin VI complex	CELLULAR_COMPONENT	0.18853804151068126	0.006998975759101219
GO:0016461	unconventional myosin complex	CELLULAR_COMPONENT	0.18853804151068126	0.006998975759101219
GO:0071013	catalytic step 2 spliceosome	CELLULAR_COMPONENT	0.18853804151068126	0.005455277029701369
GO:0005642	annulate lamellae	CELLULAR_COMPONENT	0.18853804151068126	0.006998975759101219
GO:0005635	nuclear envelope	CELLULAR_COMPONENT	0.18853804151068126	0.005534569150919182
GO:0000818	nuclear MIS12/MIND complex	CELLULAR_COMPONENT	0.18853804151068126	0.006998975759101219
GO:0000786	nucleosome	CELLULAR_COMPONENT	0.18853804151068126	0.005468289948514728
GO:0070557	PCNA-p21 complex	CELLULAR_COMPONENT	0.18853804151068126	0.006998975759101219
GO:1990356	sumoylated E2 ligase complex	CELLULAR_COMPONENT	0.18853804151068126	0.006998975759101219
GO:0005852	eukaryotic translation initiation factor 3 complex	CELLULAR_COMPONENT	0.20461277971092187	0.007686348772696985
GO:0140097	catalytic activity, acting on DNA	MOLECULAR_FUNCTION	7.397626583530131E-13	6.554112327040073E-16
GO:0003676	nucleic acid binding	MOLECULAR_FUNCTION	2.779833111552345E-12	2.955435220929223E-15
GO:1901363	heterocyclic compound binding	MOLECULAR_FUNCTION	1.8571477935922812E-10	4.2780050175776833E-13
GO:0097159	organic cyclic compound binding	MOLECULAR_FUNCTION	2.0186451451315441E-10	4.828866742141552E-13
GO:0140640	catalytic activity, acting on a nucleic acid	MOLECULAR_FUNCTION	2.5113362835036495E-10	6.229947367600088E-13
GO:0003677	DNA binding	MOLECULAR_FUNCTION	4.006923027250687E-10	1.0650101073582051E-12
GO:0008094	ATP-dependent activity, acting on DNA	MOLECULAR_FUNCTION	1.4832904368075184E-9	4.205306456794595E-12
GO:0003682	chromatin binding	MOLECULAR_FUNCTION	4.33130420048206E-8	1.6400560551887688E-10
GO:0003678	DNA helicase activity	MOLECULAR_FUNCTION	1.1675317121482478E-5	7.137387094731027E-8
GO:0003689	DNA clamp loader activity	MOLECULAR_FUNCTION	1.2165884703226558E-5	7.868429018654547E-8
GO:0003723	RNA binding	MOLECULAR_FUNCTION	1.0298228470695382E-4	7.390418234485037E-7
GO:0005515	protein binding	MOLECULAR_FUNCTION	2.1683192066507544E-4	1.632915146321557E-6
GO:0003697	single-stranded DNA binding	MOLECULAR_FUNCTION	0.0040317316835985955	4.107815572019478E-5
GO:0004536	deoxyribonuclease activity	MOLECULAR_FUNCTION	0.007101599748172326	7.990636732682604E-5
GO:0003755	peptidyl-prolyl cis-trans isomerase activity	MOLECULAR_FUNCTION	0.007101599748172326	7.990636732682604E-5
GO:0016859	cis-trans isomerase activity	MOLECULAR_FUNCTION	0.007934658033160909	9.007248243600065E-5
GO:0005488	binding	MOLECULAR_FUNCTION	0.011217525271673245	1.3767627220035152E-4
GO:0008311	double-stranded DNA 3'-5' exodeoxyribonuclease activity	MOLECULAR_FUNCTION	0.011217525271673245	1.451013280468055E-4
GO:0008309	double-stranded DNA exodeoxyribonuclease activity	MOLECULAR_FUNCTION	0.011217525271673245	1.451013280468055E-4
GO:0004386	helicase activity	MOLECULAR_FUNCTION	0.012782706904704663	1.6761235243167272E-4
GO:0008296	3'-5'-exodeoxyribonuclease activity	MOLECULAR_FUNCTION	0.019641498177400168	2.888711524274323E-4
GO:0046982	protein heterodimerization activity	MOLECULAR_FUNCTION	0.023403418319792986	3.5041886205767824E-4
GO:0005524	ATP binding	MOLECULAR_FUNCTION	0.023528242321939855	3.543723925515882E-4
GO:0008168	methyltransferase activity	MOLECULAR_FUNCTION	0.023656573367760992	3.584011735525055E-4
GO:0004518	nuclease activity	MOLECULAR_FUNCTION	0.02428384000594835	3.700558590434231E-4
GO:0003906	DNA-(apurinic or apyrimidinic site) endonuclease activity	MOLECULAR_FUNCTION	0.029721034528937925	4.792441113020911E-4
GO:0016853	isomerase activity	MOLECULAR_FUNCTION	0.030010126215716776	4.901836452878239E-4
GO:0016741	transferase activity, transferring one-carbon groups	MOLECULAR_FUNCTION	0.030010126215716776	4.892256102074051E-4
GO:0030554	adenyl nucleotide binding	MOLECULAR_FUNCTION	0.03190013063688818	5.313391122295541E-4
GO:0032559	adenyl ribonucleotide binding	MOLECULAR_FUNCTION	0.03190013063688818	5.313391122295541E-4
GO:0042802	identical protein binding	MOLECULAR_FUNCTION	0.03472200189141121	5.886296153296723E-4
GO:0042393	histone binding	MOLECULAR_FUNCTION	0.03520253097760483	6.081769771093242E-4
GO:0008022	protein C-terminus binding	MOLECULAR_FUNCTION	0.03899929417950407	6.875927652805271E-4
GO:0004529	exodeoxyribonuclease activity	MOLECULAR_FUNCTION	0.06639400160549792	0.0013235270985414223
GO:0016895	exodeoxyribonuclease activity, producing 5'-phosphomonoesters	MOLECULAR_FUNCTION	0.06639400160549792	0.0013235270985414223
GO:0004527	exonuclease activity	MOLECULAR_FUNCTION	0.06854130119605882	0.0013906226609282778
GO:0016893	endonuclease activity, active with either ribo- or deoxyribonucleic acids and producing 5'-phosphomonoesters	MOLECULAR_FUNCTION	0.07021713545618022	0.0014308444365129307
GO:0000287	magnesium ion binding	MOLECULAR_FUNCTION	0.07168026645045833	0.0014670099716537499
GO:0003743	translation initiation factor activity	MOLECULAR_FUNCTION	0.07522761378056302	0.0015462750418260495
GO:0008408	3'-5' exonuclease activity	MOLECULAR_FUNCTION	0.08126945803149246	0.0017087639623901347
GO:0045182	translation regulator activity	MOLECULAR_FUNCTION	0.08478692364702058	0.0017953463942268024
GO:0035639	purine ribonucleoside triphosphate binding	MOLECULAR_FUNCTION	0.09039215705463624	0.0019264008707634529
GO:0030515	snoRNA binding	MOLECULAR_FUNCTION	0.09670482173033712	0.0021076801759247745
GO:0043168	anion binding	MOLECULAR_FUNCTION	0.1032903853872891	0.0022603637096359004
GO:0032555	purine ribonucleotide binding	MOLECULAR_FUNCTION	0.11904109354709638	0.002710513071817469
GO:0017076	purine nucleotide binding	MOLECULAR_FUNCTION	0.11952245740533878	0.0027320629051632325
GO:0036094	small molecule binding	MOLECULAR_FUNCTION	0.11981367727309224	0.0027493348466138823
GO:0032553	ribonucleotide binding	MOLECULAR_FUNCTION	0.12991119756249314	0.003073118609833053
GO:0008080	N-acetyltransferase activity	MOLECULAR_FUNCTION	0.1388937394719306	0.003366544384567507
GO:0046983	protein dimerization activity	MOLECULAR_FUNCTION	0.1388937394719306	0.003371744893710374
GO:0140657	ATP-dependent activity	MOLECULAR_FUNCTION	0.14855241964828733	0.003658861757971461
GO:0047485	protein N-terminus binding	MOLECULAR_FUNCTION	0.16344137315877177	0.004184863723122623
GO:1901265	nucleoside phosphate binding	MOLECULAR_FUNCTION	0.17529758730486478	0.004643747550647167
GO:0000166	nucleotide binding	MOLECULAR_FUNCTION	0.17529758730486478	0.004643747550647167
GO:0019899	enzyme binding	MOLECULAR_FUNCTION	0.1833111025720378	0.004920994425385617
GO:0004170	dUTP diphosphatase activity	MOLECULAR_FUNCTION	0.18853804151068126	0.006998975759101219
GO:0043398	HLH domain binding	MOLECULAR_FUNCTION	0.18853804151068126	0.006998975759101219
GO:0035035	histone acetyltransferase binding	MOLECULAR_FUNCTION	0.18853804151068126	0.006998975759101219
GO:0016410	N-acyltransferase activity	MOLECULAR_FUNCTION	0.18853804151068126	0.0051604271730820075
GO:0004482	mRNA (guanine-N7-)-methyltransferase activity	MOLECULAR_FUNCTION	0.18853804151068126	0.006998975759101219
GO:0004523	RNA-DNA hybrid ribonuclease activity	MOLECULAR_FUNCTION	0.18853804151068126	0.005468289948514728
GO:0061656	SUMO conjugating enzyme activity	MOLECULAR_FUNCTION	0.18853804151068126	0.006998975759101219
GO:0000701	purine-specific mismatch base pair DNA N-glycosylase activity	MOLECULAR_FUNCTION	0.18853804151068126	0.006998975759101219
GO:0004392	heme oxygenase (decyclizing) activity	MOLECULAR_FUNCTION	0.18853804151068126	0.006998975759101219
GO:1990259	histone-glutamine methyltransferase activity	MOLECULAR_FUNCTION	0.18853804151068126	0.006998975759101219
GO:0032028	myosin head/neck binding	MOLECULAR_FUNCTION	0.18853804151068126	0.006998975759101219
GO:0019136	deoxynucleoside kinase activity	MOLECULAR_FUNCTION	0.18853804151068126	0.006998975759101219
GO:0004638	phosphoribosylaminoimidazole carboxylase activity	MOLECULAR_FUNCTION	0.18853804151068126	0.006998975759101219
GO:0004639	phosphoribosylaminoimidazolesuccinocarboxamide synthase activity	MOLECULAR_FUNCTION	0.18853804151068126	0.006998975759101219
GO:0004694	eukaryotic translation initiation factor 2alpha kinase activity	MOLECULAR_FUNCTION	0.18853804151068126	0.006998975759101219
GO:0004797	thymidine kinase activity	MOLECULAR_FUNCTION	0.18853804151068126	0.006998975759101219
GO:0071535	RING-like zinc finger domain binding	MOLECULAR_FUNCTION	0.18853804151068126	0.006998975759101219
GO:0036009	protein-glutamine N-methyltransferase activity	MOLECULAR_FUNCTION	0.18853804151068126	0.006998975759101219
GO:0070905	serine binding	MOLECULAR_FUNCTION	0.18853804151068126	0.006998975759101219
GO:0070853	myosin VI binding	MOLECULAR_FUNCTION	0.18853804151068126	0.006998975759101219
GO:0070854	myosin VI heavy chain binding	MOLECULAR_FUNCTION	0.18853804151068126	0.006998975759101219
GO:0070855	myosin VI head/neck binding	MOLECULAR_FUNCTION	0.18853804151068126	0.006998975759101219
GO:0052858	peptidyl-lysine acetyltransferase activity	MOLECULAR_FUNCTION	0.18853804151068126	0.006998975759101219
GO:0016407	acetyltransferase activity	MOLECULAR_FUNCTION	0.19027253150294035	0.00708022178003322
GO:0004519	endonuclease activity	MOLECULAR_FUNCTION	0.21034470779075687	0.007940115243660891
GO:0043022	ribosome binding	MOLECULAR_FUNCTION	0.24326145797015097	0.00935372311145969
GO:0008135	translation factor activity, RNA binding	MOLECULAR_FUNCTION	0.25320823876390336	0.009781057154342328

## Sheet: Cluster 5
Supplementary Table 3. Each sheet of the table represents the blast2GO enrichment list of the total marker genes defined for each of the transcriptomic clusters.
GO ID	GO Name	GO Category	FDR	P-value
GO:0019915	lipid storage	BIOLOGICAL_PROCESS	1.0	0.006639403961738334
GO:0006689	ganglioside catabolic process	BIOLOGICAL_PROCESS	1.0	0.004090438711296425
GO:0006687	glycosphingolipid metabolic process	BIOLOGICAL_PROCESS	1.0	0.006639403961738334
GO:0006672	ceramide metabolic process	BIOLOGICAL_PROCESS	1.0	0.009690506380820661
GO:0050885	neuromuscular process controlling balance	BIOLOGICAL_PROCESS	1.0	0.004090438711296425
GO:0001573	ganglioside metabolic process	BIOLOGICAL_PROCESS	1.0	0.004090438711296425
GO:0030149	sphingolipid catabolic process	BIOLOGICAL_PROCESS	1.0	0.00867439911652583
GO:0004563	beta-N-acetylhexosaminidase activity	MOLECULAR_FUNCTION	1.0	0.006130075336408111
GO:0009313	oligosaccharide catabolic process	BIOLOGICAL_PROCESS	1.0	0.002047082244182081
GO:0009311	oligosaccharide metabolic process	BIOLOGICAL_PROCESS	1.0	0.004090438711296425
GO:0005576	extracellular region	CELLULAR_COMPONENT	1.0	9.438138159558327E-4
GO:0050905	neuromuscular process	BIOLOGICAL_PROCESS	1.0	0.008165998044870993
GO:0046466	membrane lipid catabolic process	BIOLOGICAL_PROCESS	1.0	0.00867439911652583
GO:0046479	glycosphingolipid catabolic process	BIOLOGICAL_PROCESS	1.0	0.005620514590710343
GO:0046514	ceramide catabolic process	BIOLOGICAL_PROCESS	1.0	0.005620514590710343
GO:0015929	hexosaminidase activity	MOLECULAR_FUNCTION	1.0	0.006130075336408111
GO:0019377	glycolipid catabolic process	BIOLOGICAL_PROCESS	1.0	0.005620514590710343

## Sheet: Cluster 6
Supplementary Table 3. Each sheet of the table represents the blast2GO enrichment list of the total marker genes defined for each of the transcriptomic clusters.
GO ID	GO Name	GO Category	FDR	P-value
GO:0003735	structural constituent of ribosome	MOLECULAR_FUNCTION	1.2277314647238977E-31	1.0877394034941947E-35
GO:0005840	ribosome	CELLULAR_COMPONENT	1.2751897731415233E-30	2.259572558060642E-34
GO:0005198	structural molecule activity	MOLECULAR_FUNCTION	3.0889164944146788E-27	8.210108517094034E-31
GO:0044391	ribosomal subunit	CELLULAR_COMPONENT	8.829133122429573E-27	3.128956542014556E-30
GO:0022626	cytosolic ribosome	CELLULAR_COMPONENT	1.857384147927215E-25	8.227979746288716E-29
GO:0006412	translation	BIOLOGICAL_PROCESS	9.55965198958938E-21	5.0817676918168055E-24
GO:0043043	peptide biosynthetic process	BIOLOGICAL_PROCESS	2.1341562994121944E-20	1.3235664123226156E-23
GO:0043604	amide biosynthetic process	BIOLOGICAL_PROCESS	7.422011590543369E-20	5.260573467205365E-23
GO:0006518	peptide metabolic process	BIOLOGICAL_PROCESS	3.5518914903373376E-19	2.8321984063999326E-22
GO:0043603	cellular amide metabolic process	BIOLOGICAL_PROCESS	1.1308191974970247E-18	1.0018775560352836E-21
GO:0034645	cellular macromolecule biosynthetic process	BIOLOGICAL_PROCESS	4.658431857850389E-16	4.539979661234542E-19
GO:1990904	ribonucleoprotein complex	CELLULAR_COMPONENT	7.546109008088248E-15	8.022796854528127E-18
GO:0022627	cytosolic small ribosomal subunit	CELLULAR_COMPONENT	1.6570046842502273E-14	1.9084841760656467E-17
GO:0015935	small ribosomal subunit	CELLULAR_COMPONENT	1.9329851648548207E-14	2.3976071859632754E-17
GO:1901566	organonitrogen compound biosynthetic process	BIOLOGICAL_PROCESS	5.149343382176266E-13	6.843284374292903E-16
GO:0015934	large ribosomal subunit	CELLULAR_COMPONENT	2.0733781241050254E-11	2.939137945041234E-14
GO:0043228	non-membrane-bounded organelle	CELLULAR_COMPONENT	2.0800366295440665E-11	3.317148873198653E-14
GO:0043232	intracellular non-membrane-bounded organelle	CELLULAR_COMPONENT	2.0800366295440665E-11	3.317148873198653E-14
GO:0042254	ribosome biogenesis	BIOLOGICAL_PROCESS	2.2441611837787855E-11	3.77771440522698E-14
GO:0005829	cytosol	CELLULAR_COMPONENT	4.827131891937321E-11	8.553436505603474E-14
GO:0022625	cytosolic large ribosomal subunit	CELLULAR_COMPONENT	3.2461049223180664E-10	6.039532503648392E-13
GO:0022613	ribonucleoprotein complex biogenesis	BIOLOGICAL_PROCESS	1.9224986135914786E-9	3.747228625765264E-12
GO:0009059	macromolecule biosynthetic process	BIOLOGICAL_PROCESS	4.4939272883175474E-9	9.157466787570088E-12
GO:0044267	cellular protein metabolic process	BIOLOGICAL_PROCESS	2.4283443032080184E-8	5.1634857160443376E-11
GO:0044271	cellular nitrogen compound biosynthetic process	BIOLOGICAL_PROCESS	8.829018061971307E-8	1.9555723535862734E-10
GO:0010467	gene expression	BIOLOGICAL_PROCESS	1.6193300217519326E-7	3.730183446934548E-10
GO:0019538	protein metabolic process	BIOLOGICAL_PROCESS	1.2089285857305604E-6	2.8919174107136645E-9
GO:0044249	cellular biosynthetic process	BIOLOGICAL_PROCESS	6.950778932671425E-6	1.724300612339859E-8
GO:0042255	ribosome assembly	BIOLOGICAL_PROCESS	6.99817225456394E-6	1.7980596738048574E-8
GO:1901576	organic substance biosynthetic process	BIOLOGICAL_PROCESS	1.2953222819433265E-5	3.442869536484433E-8
GO:0042274	ribosomal small subunit biogenesis	BIOLOGICAL_PROCESS	1.6170677968504717E-5	4.44131316579823E-8
GO:0009058	biosynthetic process	BIOLOGICAL_PROCESS	2.3084226965997694E-5	6.544655470115409E-8
GO:0044085	cellular component biogenesis	BIOLOGICAL_PROCESS	5.323230983811405E-5	1.556362385627504E-7
GO:0044260	cellular macromolecule metabolic process	BIOLOGICAL_PROCESS	5.7358815993802064E-5	1.727828248240693E-7
GO:0006364	rRNA processing	BIOLOGICAL_PROCESS	9.523666098335017E-5	2.9532055766964263E-7
GO:0016072	rRNA metabolic process	BIOLOGICAL_PROCESS	2.5018480431151553E-4	7.979669491640436E-7
GO:1901564	organonitrogen compound metabolic process	BIOLOGICAL_PROCESS	3.1966289204257014E-4	1.0478893422145029E-6
GO:0042273	ribosomal large subunit biogenesis	BIOLOGICAL_PROCESS	3.751750892535112E-4	1.2631038709695602E-6
GO:0002181	cytoplasmic translation	BIOLOGICAL_PROCESS	5.45251897802488E-4	1.884010278576861E-6
GO:0140694	non-membrane-bounded organelle assembly	BIOLOGICAL_PROCESS	7.743819152759437E-4	2.744332117572229E-6
GO:0034641	cellular nitrogen compound metabolic process	BIOLOGICAL_PROCESS	0.0011455578399045836	4.161236062380431E-6
GO:0019083	viral transcription	BIOLOGICAL_PROCESS	0.0013219880281552438	4.919243127715092E-6
GO:0022618	ribonucleoprotein complex assembly	BIOLOGICAL_PROCESS	0.0015436368410710073	6.01754416648572E-6
GO:0071826	ribonucleoprotein complex subunit organization	BIOLOGICAL_PROCESS	0.0015436368410710073	6.01754416648572E-6
GO:0019080	viral gene expression	BIOLOGICAL_PROCESS	0.0021248417900881513	8.471505320631417E-6
GO:0006614	SRP-dependent cotranslational protein targeting to membrane	BIOLOGICAL_PROCESS	0.0026560462242443674	1.0824676735646398E-5
GO:0006613	cotranslational protein targeting to membrane	BIOLOGICAL_PROCESS	0.0031388473071995325	1.3626607429146548E-5
GO:0070161	anchoring junction	CELLULAR_COMPONENT	0.0031388473071995325	1.3247436244872226E-5
GO:0000027	ribosomal large subunit assembly	BIOLOGICAL_PROCESS	0.0031388473071995325	1.3626607429146548E-5
GO:0032991	protein-containing complex	CELLULAR_COMPONENT	0.0037464260379696597	1.664614149805208E-5
GO:0045047	protein targeting to ER	BIOLOGICAL_PROCESS	0.0037464260379696597	1.692812332209202E-5
GO:0034470	ncRNA processing	BIOLOGICAL_PROCESS	0.004070837610501558	1.9075569498882517E-5
GO:0043229	intracellular organelle	CELLULAR_COMPONENT	0.004070837610501558	1.911530019992758E-5
GO:0072599	establishment of protein localization to endoplasmic reticulum	BIOLOGICAL_PROCESS	0.005276403698390462	2.5243713981845037E-5
GO:0038128	ERBB2 signaling pathway	BIOLOGICAL_PROCESS	0.005522828166900783	2.6911982739394264E-5
GO:0070062	extracellular exosome	CELLULAR_COMPONENT	0.0055518455132979915	2.7545259922449505E-5
GO:0065010	extracellular membrane-bounded organelle	CELLULAR_COMPONENT	0.005879507414161278	3.073367036728231E-5
GO:1903561	extracellular vesicle	CELLULAR_COMPONENT	0.005879507414161278	2.9907884099970808E-5
GO:0043230	extracellular organelle	CELLULAR_COMPONENT	0.005879507414161278	3.073367036728231E-5
GO:0008199	ferric iron binding	MOLECULAR_FUNCTION	0.007549559162538252	4.0132324776494646E-5
GO:0043933	protein-containing complex organization	BIOLOGICAL_PROCESS	0.009374427961023389	5.066360464449603E-5
GO:0006612	protein targeting to membrane	BIOLOGICAL_PROCESS	0.010520203375094647	5.872001529467199E-5
GO:0070972	protein localization to endoplasmic reticulum	BIOLOGICAL_PROCESS	0.010520203375094647	5.872001529467199E-5
GO:0003723	RNA binding	MOLECULAR_FUNCTION	0.012555355934905203	7.119188268219482E-5
GO:0065003	protein-containing complex assembly	BIOLOGICAL_PROCESS	0.01472371923616747	8.665761490417027E-5
GO:0030055	cell-substrate junction	CELLULAR_COMPONENT	0.01472371923616747	8.964709544385669E-5
GO:0007178	transmembrane receptor protein serine/threonine kinase signaling pathway	BIOLOGICAL_PROCESS	0.01472371923616747	8.964709544385669E-5
GO:0005925	focal adhesion	CELLULAR_COMPONENT	0.01472371923616747	8.964709544385669E-5
GO:0000184	nuclear-transcribed mRNA catabolic process, nonsense-mediated decay	BIOLOGICAL_PROCESS	0.01472371923616747	9.00094469119833E-5
GO:0000028	ribosomal small subunit assembly	BIOLOGICAL_PROCESS	0.016653121640265646	1.0327974792403608E-4
GO:0043226	organelle	CELLULAR_COMPONENT	0.017129854987185736	1.0775402711882583E-4
GO:0051881	regulation of mitochondrial membrane potential	BIOLOGICAL_PROCESS	0.025761044527952384	1.6889494950549094E-4
GO:0004322	ferroxidase activity	MOLECULAR_FUNCTION	0.025761044527952384	1.6889494950549094E-4
GO:0016724	oxidoreductase activity, acting on metal ions, oxygen as acceptor	MOLECULAR_FUNCTION	0.025761044527952384	1.6889494950549094E-4
GO:0005615	extracellular space	CELLULAR_COMPONENT	0.02603041720509417	1.729672446515516E-4
GO:0072657	protein localization to membrane	BIOLOGICAL_PROCESS	0.026832970464683085	1.8067739481845613E-4
GO:0005737	cytoplasm	CELLULAR_COMPONENT	0.032276710485617095	2.2019196486156785E-4
GO:0016032	viral process	BIOLOGICAL_PROCESS	0.033706198542372	2.3853413324131616E-4
GO:0070925	organelle assembly	BIOLOGICAL_PROCESS	0.033706198542372	2.477165671628743E-4
GO:1990840	response to lectin	BIOLOGICAL_PROCESS	0.033706198542372	2.5682050807513E-4
GO:1990858	cellular response to lectin	BIOLOGICAL_PROCESS	0.033706198542372	2.5682050807513E-4
GO:0002220	innate immune response activating cell surface receptor signaling pathway	BIOLOGICAL_PROCESS	0.033706198542372	2.5682050807513E-4
GO:0002223	stimulatory C-type lectin receptor signaling pathway	BIOLOGICAL_PROCESS	0.033706198542372	2.5682050807513E-4
GO:0002218	activation of innate immune response	BIOLOGICAL_PROCESS	0.033706198542372	2.5682050807513E-4
GO:0043170	macromolecule metabolic process	BIOLOGICAL_PROCESS	0.033706198542372	2.467513692101384E-4
GO:0002758	innate immune response-activating signal transduction	BIOLOGICAL_PROCESS	0.033706198542372	2.5682050807513E-4
GO:0042592	homeostatic process	BIOLOGICAL_PROCESS	0.033911739295446455	2.613910976082078E-4
GO:0016722	oxidoreductase activity, acting on metal ions	MOLECULAR_FUNCTION	0.03976591609480049	3.100381515320673E-4
GO:1902527	positive regulation of protein monoubiquitination	BIOLOGICAL_PROCESS	0.04492313957890754	3.741273252784007E-4
GO:1902525	regulation of protein monoubiquitination	BIOLOGICAL_PROCESS	0.04492313957890754	3.741273252784007E-4
GO:0031672	A band	CELLULAR_COMPONENT	0.04492313957890754	3.741273252784007E-4
GO:0006879	cellular iron ion homeostasis	BIOLOGICAL_PROCESS	0.04492313957890754	3.6988084648999355E-4
GO:0090150	establishment of protein localization to membrane	BIOLOGICAL_PROCESS	0.04492313957890754	3.7409771503912973E-4
GO:0007173	epidermal growth factor receptor signaling pathway	BIOLOGICAL_PROCESS	0.04492313957890754	3.6988084648999355E-4
GO:0034660	ncRNA metabolic process	BIOLOGICAL_PROCESS	0.04786505908686113	4.0286884143278176E-4
GO:0045089	positive regulation of innate immune response	BIOLOGICAL_PROCESS	0.05081227230798235	4.3667851633510127E-4
GO:0006826	iron ion transport	BIOLOGICAL_PROCESS	0.05081227230798235	4.3667851633510127E-4
GO:0006605	protein targeting	BIOLOGICAL_PROCESS	0.05368230931732471	4.7085572981440124E-4
GO:0005622	intracellular anatomical structure	CELLULAR_COMPONENT	0.05368230931732471	4.661935232464277E-4
GO:0007167	enzyme linked receptor protein signaling pathway	BIOLOGICAL_PROCESS	0.06340267954010757	5.617318998857763E-4
GO:0019843	rRNA binding	MOLECULAR_FUNCTION	0.06482551815191495	6.18983472795755E-4
GO:1902255	positive regulation of intrinsic apoptotic signaling pathway by p53 class mediator	BIOLOGICAL_PROCESS	0.06482551815191495	6.20284926057129E-4
GO:1902253	regulation of intrinsic apoptotic signaling pathway by p53 class mediator	BIOLOGICAL_PROCESS	0.06482551815191495	6.20284926057129E-4
GO:0038127	ERBB signaling pathway	BIOLOGICAL_PROCESS	0.06482551815191495	5.924137730471275E-4
GO:0051668	localization within membrane	BIOLOGICAL_PROCESS	0.06482551815191495	5.876830912464168E-4
GO:0043114	regulation of vascular permeability	BIOLOGICAL_PROCESS	0.06482551815191495	6.20284926057129E-4
GO:0018243	protein O-linked glycosylation via threonine	BIOLOGICAL_PROCESS	0.06482551815191495	6.20284926057129E-4
GO:0010992	ubiquitin recycling	BIOLOGICAL_PROCESS	0.06482551815191495	6.20284926057129E-4
GO:0031349	positive regulation of defense response	BIOLOGICAL_PROCESS	0.06997600777086475	6.819669402671324E-4
GO:0002833	positive regulation of response to biotic stimulus	BIOLOGICAL_PROCESS	0.06997600777086475	6.819669402671324E-4
GO:0006402	mRNA catabolic process	BIOLOGICAL_PROCESS	0.07372377469234459	7.250233889297644E-4
GO:0038093	Fc receptor signaling pathway	BIOLOGICAL_PROCESS	0.07857631772014242	7.7970652827642E-4
GO:0051897	positive regulation of protein kinase B signaling	BIOLOGICAL_PROCESS	0.08736771006732301	9.255650458178173E-4
GO:0006413	translational initiation	BIOLOGICAL_PROCESS	0.08736771006732301	9.288672993779357E-4
GO:2001242	regulation of intrinsic apoptotic signaling pathway	BIOLOGICAL_PROCESS	0.08736771006732301	8.859190497081877E-4
GO:0007179	transforming growth factor beta receptor signaling pathway	BIOLOGICAL_PROCESS	0.08736771006732301	8.859190497081877E-4
GO:0004653	polypeptide N-acetylgalactosaminyltransferase activity	MOLECULAR_FUNCTION	0.08736771006732301	9.255650458178173E-4
GO:1901798	positive regulation of signal transduction by p53 class mediator	BIOLOGICAL_PROCESS	0.08736771006732301	9.255650458178173E-4
GO:0006294	nucleotide-excision repair, preincision complex assembly	BIOLOGICAL_PROCESS	0.08736771006732301	9.255650458178173E-4
GO:0002755	MyD88-dependent toll-like receptor signaling pathway	BIOLOGICAL_PROCESS	0.08736771006732301	9.255650458178173E-4
GO:0000462	maturation of SSU-rRNA from tricistronic rRNA transcript (SSU-rRNA, 5.8S rRNA, LSU-rRNA)	BIOLOGICAL_PROCESS	0.09336333615566465	0.0010008827566966797
GO:0019725	cellular homeostasis	BIOLOGICAL_PROCESS	0.09627072609750988	0.0010405801881718973
GO:0031347	regulation of defense response	BIOLOGICAL_PROCESS	0.10081625002129153	0.0010986443477114254
GO:0002757	immune response-activating signal transduction	BIOLOGICAL_PROCESS	0.10157106076635511	0.0011248677767160794
GO:0002429	immune response-activating cell surface receptor signaling pathway	BIOLOGICAL_PROCESS	0.10157106076635511	0.0011248677767160794
GO:1901186	positive regulation of ERBB signaling pathway	BIOLOGICAL_PROCESS	0.10281396413361805	0.0012890235490397306
GO:0150116	regulation of cell-substrate junction organization	BIOLOGICAL_PROCESS	0.10281396413361805	0.0012890235490397306
GO:0051893	regulation of focal adhesion assembly	BIOLOGICAL_PROCESS	0.10281396413361805	0.0012890235490397306
GO:0006401	RNA catabolic process	BIOLOGICAL_PROCESS	0.10281396413361805	0.0012822252572575069
GO:0030054	cell junction	CELLULAR_COMPONENT	0.10281396413361805	0.0012649553314037399
GO:0070911	global genome nucleotide-excision repair	BIOLOGICAL_PROCESS	0.10281396413361805	0.0012890235490397306
GO:0030097	hemopoiesis	BIOLOGICAL_PROCESS	0.10281396413361805	0.0011725698247741897
GO:0006875	cellular metal ion homeostasis	BIOLOGICAL_PROCESS	0.10281396413361805	0.001250402760998747
GO:0090109	regulation of cell-substrate junction assembly	BIOLOGICAL_PROCESS	0.10281396413361805	0.0012890235490397306
GO:0047497	mitochondrion transport along microtubule	BIOLOGICAL_PROCESS	0.10281396413361805	0.0012890235490397306
GO:0000717	nucleotide-excision repair, DNA duplex unwinding	BIOLOGICAL_PROCESS	0.10281396413361805	0.0012890235490397306
GO:0000715	nucleotide-excision repair, DNA damage recognition	BIOLOGICAL_PROCESS	0.10281396413361805	0.0012890235490397306
GO:0034643	establishment of mitochondrion localization, microtubule-mediated	BIOLOGICAL_PROCESS	0.10281396413361805	0.0012890235490397306
GO:0051654	establishment of mitochondrion localization	BIOLOGICAL_PROCESS	0.10281396413361805	0.0012890235490397306
GO:0048041	focal adhesion assembly	BIOLOGICAL_PROCESS	0.10281396413361805	0.0012890235490397306
GO:0045742	positive regulation of epidermal growth factor receptor signaling pathway	BIOLOGICAL_PROCESS	0.10281396413361805	0.0012890235490397306
GO:0071840	cellular component organization or biogenesis	BIOLOGICAL_PROCESS	0.10281396413361805	0.001293486569236623
GO:0002253	activation of immune response	BIOLOGICAL_PROCESS	0.10756760135207613	0.0014009424469527058
GO:0071560	cellular response to transforming growth factor beta stimulus	BIOLOGICAL_PROCESS	0.10756760135207613	0.0014009424469527058
GO:0071559	response to transforming growth factor beta	BIOLOGICAL_PROCESS	0.10756760135207613	0.0014009424469527058
GO:0031012	extracellular matrix	CELLULAR_COMPONENT	0.10756760135207613	0.0013745014010682968
GO:0055072	iron ion homeostasis	BIOLOGICAL_PROCESS	0.10756760135207613	0.0014009424469527058
GO:0048534	hematopoietic or lymphoid organ development	BIOLOGICAL_PROCESS	0.11139633994996995	0.0014606767354120272
GO:0006807	nitrogen compound metabolic process	BIOLOGICAL_PROCESS	0.11199663633548643	0.0014784707020454929
GO:0046916	cellular transition metal ion homeostasis	BIOLOGICAL_PROCESS	0.11689817449793341	0.0015535329294489246
GO:0050801	ion homeostasis	BIOLOGICAL_PROCESS	0.11880457111916913	0.001589394014263714
GO:0006396	RNA processing	BIOLOGICAL_PROCESS	0.12171592823558336	0.0017253963424907713
GO:0030864	cortical actin cytoskeleton	CELLULAR_COMPONENT	0.12171592823558336	0.0017097274045257752
GO:0008376	acetylgalactosaminyltransferase activity	MOLECULAR_FUNCTION	0.12171592823558336	0.0017097274045257752
GO:0046794	transport of virus	BIOLOGICAL_PROCESS	0.12171592823558336	0.0017097274045257752
GO:0070423	nucleotide-binding oligomerization domain containing signaling pathway	BIOLOGICAL_PROCESS	0.12171592823558336	0.0017097274045257752
GO:0035872	nucleotide-binding domain, leucine rich repeat containing receptor signaling pathway	BIOLOGICAL_PROCESS	0.12171592823558336	0.0017097274045257752
GO:0000041	transition metal ion transport	BIOLOGICAL_PROCESS	0.12171592823558336	0.0017161466496744624
GO:0075733	intracellular transport of virus	BIOLOGICAL_PROCESS	0.12171592823558336	0.0017097274045257752
GO:0002768	immune response-regulating cell surface receptor signaling pathway	BIOLOGICAL_PROCESS	0.12171592823558336	0.0017161466496744624
GO:0065008	regulation of biological quality	BIOLOGICAL_PROCESS	0.12304328687814542	0.0017551137757935158
GO:0022607	cellular component assembly	BIOLOGICAL_PROCESS	0.12785066302385492	0.0018350143891082218
GO:0045088	regulation of innate immune response	BIOLOGICAL_PROCESS	0.12844164668054825	0.0018890150924932231
GO:0030490	maturation of SSU-rRNA	BIOLOGICAL_PROCESS	0.12844164668054825	0.0018890150924932231
GO:0032103	positive regulation of response to external stimulus	BIOLOGICAL_PROCESS	0.12844164668054825	0.0018890150924932231
GO:0051090	regulation of DNA-binding transcription factor activity	BIOLOGICAL_PROCESS	0.12844164668054825	0.0018890150924932231
GO:0005576	extracellular region	CELLULAR_COMPONENT	0.12958619697621362	0.0019216486541005894
GO:0051726	regulation of cell cycle	BIOLOGICAL_PROCESS	0.12958619697621362	0.0019288102323029937
GO:0042276	error-prone translesion synthesis	BIOLOGICAL_PROCESS	0.13561482875320652	0.002186754570132328
GO:1901185	negative regulation of ERBB signaling pathway	BIOLOGICAL_PROCESS	0.13561482875320652	0.002186754570132328
GO:0150115	cell-substrate junction organization	BIOLOGICAL_PROCESS	0.13561482875320652	0.002186754570132328
GO:0070987	error-free translesion synthesis	BIOLOGICAL_PROCESS	0.13561482875320652	0.002186754570132328
GO:0042059	negative regulation of epidermal growth factor receptor signaling pathway	BIOLOGICAL_PROCESS	0.13561482875320652	0.002186754570132328
GO:0030863	cortical cytoskeleton	CELLULAR_COMPONENT	0.13561482875320652	0.002186754570132328
GO:2001244	positive regulation of intrinsic apoptotic signaling pathway	BIOLOGICAL_PROCESS	0.13561482875320652	0.002186754570132328
GO:0001952	regulation of cell-matrix adhesion	BIOLOGICAL_PROCESS	0.13561482875320652	0.002186754570132328
GO:0007044	cell-substrate junction assembly	BIOLOGICAL_PROCESS	0.13561482875320652	0.002186754570132328
GO:0051646	mitochondrion localization	BIOLOGICAL_PROCESS	0.13561482875320652	0.002186754570132328
GO:0032480	negative regulation of type I interferon production	BIOLOGICAL_PROCESS	0.13561482875320652	0.002186754570132328
GO:0006296	nucleotide-excision repair, DNA incision, 5'-to lesion	BIOLOGICAL_PROCESS	0.13561482875320652	0.002186754570132328
GO:0006297	nucleotide-excision repair, DNA gap filling	BIOLOGICAL_PROCESS	0.13561482875320652	0.002186754570132328
GO:0010939	regulation of necrotic cell death	BIOLOGICAL_PROCESS	0.13561482875320652	0.002186754570132328
GO:0000956	nuclear-transcribed mRNA catabolic process	BIOLOGICAL_PROCESS	0.13778302624537428	0.0022339234342964023
GO:0010629	negative regulation of gene expression	BIOLOGICAL_PROCESS	0.13996725862335507	0.00228173789197283
GO:0050778	positive regulation of immune response	BIOLOGICAL_PROCESS	0.14808371143413507	0.00247135417589016
GO:0030312	external encapsulating structure	CELLULAR_COMPONENT	0.14808371143413507	0.0024927709021427893
GO:0042391	regulation of membrane potential	BIOLOGICAL_PROCESS	0.14808371143413507	0.00247135417589016
GO:0030003	cellular cation homeostasis	BIOLOGICAL_PROCESS	0.14808371143413507	0.0024802220237307355
GO:0031982	vesicle	CELLULAR_COMPONENT	0.14808371143413507	0.0024823138485390137
GO:0002520	immune system development	BIOLOGICAL_PROCESS	0.14808371143413507	0.002451286603871966
GO:0030512	negative regulation of transforming growth factor beta receptor signaling pathway	BIOLOGICAL_PROCESS	0.15820382120700657	0.0027191938791671193
GO:0010803	regulation of tumor necrosis factor-mediated signaling pathway	BIOLOGICAL_PROCESS	0.15820382120700657	0.0027191938791671193
GO:1901888	regulation of cell junction assembly	BIOLOGICAL_PROCESS	0.15820382120700657	0.0027191938791671193
GO:0002753	cytoplasmic pattern recognition receptor signaling pathway	BIOLOGICAL_PROCESS	0.15820382120700657	0.0027191938791671193
GO:1902533	positive regulation of intracellular signal transduction	BIOLOGICAL_PROCESS	0.16691574871140483	0.0028837220695245806
GO:0043066	negative regulation of apoptotic process	BIOLOGICAL_PROCESS	0.1692154743014655	0.0029384453763699153
GO:0110165	cellular anatomical entity	CELLULAR_COMPONENT	0.17208224685046586	0.003003473255031609
GO:0055065	metal ion homeostasis	BIOLOGICAL_PROCESS	0.17258970662458126	0.0030276213264522982
GO:0043069	negative regulation of programmed cell death	BIOLOGICAL_PROCESS	0.1726339553095677	0.0030436924875169645
GO:0002764	immune response-regulating signaling pathway	BIOLOGICAL_PROCESS	0.17797500344308095	0.003153628128698165
GO:0007169	transmembrane receptor protein tyrosine kinase signaling pathway	BIOLOGICAL_PROCESS	0.1783655645805164	0.0031763514202785325
GO:0061418	regulation of transcription from RNA polymerase II promoter in response to hypoxia	BIOLOGICAL_PROCESS	0.17940604715541397	0.0033061449285307085
GO:0051896	regulation of protein kinase B signaling	BIOLOGICAL_PROCESS	0.17940604715541397	0.0033061449285307085
GO:0036297	interstrand cross-link repair	BIOLOGICAL_PROCESS	0.17940604715541397	0.0033061449285307085
GO:0035666	TRIF-dependent toll-like receptor signaling pathway	BIOLOGICAL_PROCESS	0.17940604715541397	0.0033061449285307085
GO:0030666	endocytic vesicle membrane	CELLULAR_COMPONENT	0.17940604715541397	0.0033061449285307085
GO:0070265	necrotic cell death	BIOLOGICAL_PROCESS	0.17940604715541397	0.0033061449285307085
GO:0031234	extrinsic component of cytoplasmic side of plasma membrane	CELLULAR_COMPONENT	0.17940604715541397	0.0033061449285307085
GO:0006873	cellular ion homeostasis	BIOLOGICAL_PROCESS	0.17983540519191865	0.0033299902263764507
GO:0010608	posttranscriptional regulation of gene expression	BIOLOGICAL_PROCESS	0.1814394311822563	0.00337576685995161
GO:0044093	positive regulation of molecular function	BIOLOGICAL_PROCESS	0.19223515974019398	0.0035936580761212838
GO:1903844	regulation of cellular response to transforming growth factor beta stimulus	BIOLOGICAL_PROCESS	0.2015683514367412	0.00394671796469565
GO:0060071	Wnt signaling pathway, planar cell polarity pathway	BIOLOGICAL_PROCESS	0.2015683514367412	0.00394671796469565
GO:0019897	extrinsic component of plasma membrane	CELLULAR_COMPONENT	0.2015683514367412	0.00394671796469565
GO:0043491	protein kinase B signaling	BIOLOGICAL_PROCESS	0.2015683514367412	0.00394671796469565
GO:2001235	positive regulation of apoptotic signaling pathway	BIOLOGICAL_PROCESS	0.2015683514367412	0.00394671796469565
GO:0090175	regulation of establishment of planar polarity	BIOLOGICAL_PROCESS	0.2015683514367412	0.00394671796469565
GO:0051092	positive regulation of NF-kappaB transcription factor activity	BIOLOGICAL_PROCESS	0.2015683514367412	0.00394671796469565
GO:0017015	regulation of transforming growth factor beta receptor signaling pathway	BIOLOGICAL_PROCESS	0.2015683514367412	0.00394671796469565
GO:0002756	MyD88-independent toll-like receptor signaling pathway	BIOLOGICAL_PROCESS	0.2015683514367412	0.00394671796469565
GO:0033683	nucleotide-excision repair, DNA incision	BIOLOGICAL_PROCESS	0.2015683514367412	0.00394671796469565
GO:0055076	transition metal ion homeostasis	BIOLOGICAL_PROCESS	0.21493810051734233	0.004227541270031895
GO:0022603	regulation of anatomical structure morphogenesis	BIOLOGICAL_PROCESS	0.22063752735513817	0.0043591892088416595
GO:0043620	regulation of DNA-templated transcription in response to stress	BIOLOGICAL_PROCESS	0.22477279496299457	0.004640033775704593
GO:0043618	regulation of transcription from RNA polymerase II promoter in response to stress	BIOLOGICAL_PROCESS	0.22477279496299457	0.004640033775704593
GO:1901184	regulation of ERBB signaling pathway	BIOLOGICAL_PROCESS	0.22477279496299457	0.004640033775704593
GO:0042058	regulation of epidermal growth factor receptor signaling pathway	BIOLOGICAL_PROCESS	0.22477279496299457	0.004640033775704593
GO:0072332	intrinsic apoptotic signaling pathway by p53 class mediator	BIOLOGICAL_PROCESS	0.22477279496299457	0.004640033775704593
GO:0001959	regulation of cytokine-mediated signaling pathway	BIOLOGICAL_PROCESS	0.22477279496299457	0.004640033775704593
GO:0002224	toll-like receptor signaling pathway	BIOLOGICAL_PROCESS	0.22477279496299457	0.004640033775704593
GO:0019068	virion assembly	BIOLOGICAL_PROCESS	0.22477279496299457	0.004640033775704593
GO:0002020	protease binding	MOLECULAR_FUNCTION	0.22477279496299457	0.004640033775704593
GO:0033209	tumor necrosis factor-mediated signaling pathway	BIOLOGICAL_PROCESS	0.22477279496299457	0.004640033775704593
GO:0097193	intrinsic apoptotic signaling pathway	BIOLOGICAL_PROCESS	0.23040262622014457	0.004837903997003124
GO:0030099	myeloid cell differentiation	BIOLOGICAL_PROCESS	0.23040262622014457	0.004837903997003124
GO:0060548	negative regulation of cell death	BIOLOGICAL_PROCESS	0.23040262622014457	0.004817959374558201
GO:2001233	regulation of apoptotic signaling pathway	BIOLOGICAL_PROCESS	0.23040262622014457	0.004837903997003124
GO:0032101	regulation of response to external stimulus	BIOLOGICAL_PROCESS	0.2345689829524555	0.004946169747734953
GO:0007219	Notch signaling pathway	BIOLOGICAL_PROCESS	0.2427632190707653	0.005161971522723813
GO:0055082	cellular chemical homeostasis	BIOLOGICAL_PROCESS	0.2427632190707653	0.005153037936457583
GO:0009250	glucan biosynthetic process	BIOLOGICAL_PROCESS	0.24809395325521796	0.00538522358000606
GO:0010634	positive regulation of epithelial cell migration	BIOLOGICAL_PROCESS	0.24809395325521796	0.00538522358000606
GO:0002376	immune system process	BIOLOGICAL_PROCESS	0.24809395325521796	0.005377750659423339
GO:0005978	glycogen biosynthetic process	BIOLOGICAL_PROCESS	0.24809395325521796	0.00538522358000606
GO:0071456	cellular response to hypoxia	BIOLOGICAL_PROCESS	0.24809395325521796	0.00538522358000606
GO:0002831	regulation of response to biotic stimulus	BIOLOGICAL_PROCESS	0.2522973744799124	0.005498817588558381
GO:0030522	intracellular receptor signaling pathway	BIOLOGICAL_PROCESS	0.26725860364705983	0.005848575804095312
GO:0019985	translesion synthesis	BIOLOGICAL_PROCESS	0.268345339254037	0.006181428918760487
GO:0036294	cellular response to decreased oxygen levels	BIOLOGICAL_PROCESS	0.268345339254037	0.006181428918760487
GO:0032879	regulation of localization	BIOLOGICAL_PROCESS	0.268345339254037	0.006179616096039066
GO:0071356	cellular response to tumor necrosis factor	BIOLOGICAL_PROCESS	0.268345339254037	0.006181428918760487
GO:0090101	negative regulation of transmembrane receptor protein serine/threonine kinase signaling pathway	BIOLOGICAL_PROCESS	0.268345339254037	0.006181428918760487
GO:0002221	pattern recognition receptor signaling pathway	BIOLOGICAL_PROCESS	0.268345339254037	0.006181428918760487
GO:0034612	response to tumor necrosis factor	BIOLOGICAL_PROCESS	0.268345339254037	0.006181428918760487
GO:0009792	embryo development ending in birth or egg hatching	BIOLOGICAL_PROCESS	0.268345339254037	0.005936479153828363
GO:0060759	regulation of response to cytokine stimulus	BIOLOGICAL_PROCESS	0.268345339254037	0.006181428918760487
GO:0032479	regulation of type I interferon production	BIOLOGICAL_PROCESS	0.268345339254037	0.006181428918760487
GO:0032606	type I interferon production	BIOLOGICAL_PROCESS	0.268345339254037	0.006181428918760487
GO:0009898	cytoplasmic side of plasma membrane	CELLULAR_COMPONENT	0.268345339254037	0.006181428918760487
GO:0033692	cellular polysaccharide biosynthetic process	BIOLOGICAL_PROCESS	0.268345339254037	0.006181428918760487
GO:0055080	cation homeostasis	BIOLOGICAL_PROCESS	0.281820877151795	0.006516811281706255
GO:0034655	nucleobase-containing compound catabolic process	BIOLOGICAL_PROCESS	0.2865633155765789	0.006651863974578157
GO:0050851	antigen receptor-mediated signaling pathway	BIOLOGICAL_PROCESS	0.29098959441821604	0.00792350333514487
GO:0050852	T cell receptor signaling pathway	BIOLOGICAL_PROCESS	0.29098959441821604	0.007027801548736357
GO:0098562	cytoplasmic side of membrane	CELLULAR_COMPONENT	0.29098959441821604	0.00792350333514487
GO:0000271	polysaccharide biosynthetic process	BIOLOGICAL_PROCESS	0.29098959441821604	0.00792350333514487
GO:0035092	sperm DNA condensation	BIOLOGICAL_PROCESS	0.29098959441821604	0.007966313872174072
GO:0035093	spermatogenesis, exchange of chromosomal proteins	BIOLOGICAL_PROCESS	0.29098959441821604	0.007966313872174072
GO:0030154	cell differentiation	BIOLOGICAL_PROCESS	0.29098959441821604	0.007734275562402086
GO:0000900	translation repressor activity, mRNA regulatory element binding	MOLECULAR_FUNCTION	0.29098959441821604	0.007966313872174072
GO:0048878	chemical homeostasis	BIOLOGICAL_PROCESS	0.29098959441821604	0.0076285019445244
GO:0072520	seminiferous tubule development	BIOLOGICAL_PROCESS	0.29098959441821604	0.007966313872174072
GO:0071393	cellular response to progesterone stimulus	BIOLOGICAL_PROCESS	0.29098959441821604	0.007966313872174072
GO:0008015	blood circulation	BIOLOGICAL_PROCESS	0.29098959441821604	0.007795335521644431
GO:0060613	fat pad development	BIOLOGICAL_PROCESS	0.29098959441821604	0.007966313872174072
GO:0060612	adipose tissue development	BIOLOGICAL_PROCESS	0.29098959441821604	0.007966313872174072
GO:0008091	spectrin	CELLULAR_COMPONENT	0.29098959441821604	0.007966313872174072
GO:0060390	regulation of SMAD protein signal transduction	BIOLOGICAL_PROCESS	0.29098959441821604	0.007966313872174072
GO:0050900	leukocyte migration	BIOLOGICAL_PROCESS	0.29098959441821604	0.007027801548736357
GO:0003018	vascular process in circulatory system	BIOLOGICAL_PROCESS	0.29098959441821604	0.007027801548736357
GO:0006977	DNA damage response, signal transduction by p53 class mediator resulting in cell cycle arrest	BIOLOGICAL_PROCESS	0.29098959441821604	0.00792350333514487
GO:0007049	cell cycle	BIOLOGICAL_PROCESS	0.29098959441821604	0.007798371518172467
GO:0034637	cellular carbohydrate biosynthetic process	BIOLOGICAL_PROCESS	0.29098959441821604	0.007027801548736357
GO:0010810	regulation of cell-substrate adhesion	BIOLOGICAL_PROCESS	0.29098959441821604	0.007027801548736357
GO:0007182	common-partner SMAD protein phosphorylation	BIOLOGICAL_PROCESS	0.29098959441821604	0.007966313872174072
GO:0071453	cellular response to oxygen levels	BIOLOGICAL_PROCESS	0.29098959441821604	0.007027801548736357
GO:0042975	peroxisome proliferator activated receptor binding	MOLECULAR_FUNCTION	0.29098959441821604	0.007966313872174072
GO:0038061	NIK/NF-kappaB signaling	BIOLOGICAL_PROCESS	0.29098959441821604	0.007027801548736357
GO:0048014	Tie signaling pathway	BIOLOGICAL_PROCESS	0.29098959441821604	0.007966313872174072
GO:0036035	osteoclast development	BIOLOGICAL_PROCESS	0.29098959441821604	0.007966313872174072
GO:0018210	peptidyl-threonine modification	BIOLOGICAL_PROCESS	0.29098959441821604	0.00792350333514487
GO:0032437	cuticular plate	CELLULAR_COMPONENT	0.29098959441821604	0.007966313872174072
GO:0031145	anaphase-promoting complex-dependent catabolic process	BIOLOGICAL_PROCESS	0.29098959441821604	0.00792350333514487
GO:0021979	hypothalamus cell differentiation	BIOLOGICAL_PROCESS	0.29098959441821604	0.007966313872174072
GO:0006283	transcription-coupled nucleotide-excision repair	BIOLOGICAL_PROCESS	0.29098959441821604	0.007027801548736357
GO:0032570	response to progesterone	BIOLOGICAL_PROCESS	0.29098959441821604	0.007966313872174072
GO:0021886	hypothalamus gonadotrophin-releasing hormone neuron differentiation	BIOLOGICAL_PROCESS	0.29098959441821604	0.007966313872174072
GO:0021888	hypothalamus gonadotrophin-releasing hormone neuron development	BIOLOGICAL_PROCESS	0.29098959441821604	0.007966313872174072
GO:0051427	hormone receptor binding	MOLECULAR_FUNCTION	0.29098959441821604	0.007966313872174072
GO:0086103	G protein-coupled receptor signaling pathway involved in heart process	BIOLOGICAL_PROCESS	0.29098959441821604	0.007966313872174072
GO:0006013	mannose metabolic process	BIOLOGICAL_PROCESS	0.29098959441821604	0.007966313872174072
GO:0007254	JNK cascade	BIOLOGICAL_PROCESS	0.29098959441821604	0.00792350333514487
GO:0086098	angiotensin-activated signaling pathway involved in heart process	BIOLOGICAL_PROCESS	0.29098959441821604	0.007966313872174072
GO:0071800	podosome assembly	BIOLOGICAL_PROCESS	0.29098959441821604	0.007966313872174072
GO:0071801	regulation of podosome assembly	BIOLOGICAL_PROCESS	0.29098959441821604	0.007966313872174072
GO:0071824	protein-DNA complex subunit organization	BIOLOGICAL_PROCESS	0.29098959441821604	0.0069765752786936554
GO:0033625	positive regulation of integrin activation	BIOLOGICAL_PROCESS	0.29098959441821604	0.007966313872174072
GO:0033623	regulation of integrin activation	BIOLOGICAL_PROCESS	0.29098959441821604	0.007966313872174072
GO:0033622	integrin activation	BIOLOGICAL_PROCESS	0.29098959441821604	0.007966313872174072
GO:0098771	inorganic ion homeostasis	BIOLOGICAL_PROCESS	0.2949571164303467	0.008101063709879286
GO:0003013	circulatory system process	BIOLOGICAL_PROCESS	0.2975521991153261	0.008225063003808075
GO:0002684	positive regulation of immune system process	BIOLOGICAL_PROCESS	0.2975521991153261	0.008225063003808075
GO:0031571	mitotic G1 DNA damage checkpoint signaling	BIOLOGICAL_PROCESS	0.3098755395593883	0.008867706146689327
GO:0001736	establishment of planar polarity	BIOLOGICAL_PROCESS	0.3098755395593883	0.008867706146689327
GO:2000027	regulation of animal organ morphogenesis	BIOLOGICAL_PROCESS	0.3098755395593883	0.008867706146689327
GO:0005200	structural constituent of cytoskeleton	MOLECULAR_FUNCTION	0.3098755395593883	0.008668485260177173
GO:0044819	mitotic G1/S transition checkpoint signaling	BIOLOGICAL_PROCESS	0.3098755395593883	0.008867706146689327
GO:0072384	organelle transport along microtubule	BIOLOGICAL_PROCESS	0.3098755395593883	0.008867706146689327
GO:0007164	establishment of tissue polarity	BIOLOGICAL_PROCESS	0.3098755395593883	0.008867706146689327
GO:1901796	regulation of signal transduction by p53 class mediator	BIOLOGICAL_PROCESS	0.3098755395593883	0.008867706146689327
GO:0038095	Fc-epsilon receptor signaling pathway	BIOLOGICAL_PROCESS	0.3098755395593883	0.008867706146689327
GO:0043123	positive regulation of I-kappaB kinase/NF-kappaB signaling	BIOLOGICAL_PROCESS	0.3098755395593883	0.008867706146689327
GO:0043009	chordate embryonic development	BIOLOGICAL_PROCESS	0.3098755395593883	0.00868050542818636
GO:0045087	innate immune response	BIOLOGICAL_PROCESS	0.3169283138767937	0.009125693453526885
GO:0034097	response to cytokine	BIOLOGICAL_PROCESS	0.3169283138767937	0.009125693453526885
GO:0048869	cellular developmental process	BIOLOGICAL_PROCESS	0.32460885573653875	0.009375607953407606
GO:0008284	positive regulation of cell population proliferation	BIOLOGICAL_PROCESS	0.3312501121074508	0.009596773868976382
GO:2000134	negative regulation of G1/S transition of mitotic cell cycle	BIOLOGICAL_PROCESS	0.33620909995890086	0.00985959175036734
GO:0006493	protein O-linked glycosylation	BIOLOGICAL_PROCESS	0.33620909995890086	0.00985959175036734
GO:0006513	protein monoubiquitination	BIOLOGICAL_PROCESS	0.33620909995890086	0.00985959175036734
GO:0051091	positive regulation of DNA-binding transcription factor activity	BIOLOGICAL_PROCESS	0.33620909995890086	0.00985959175036734
