# Supplementary material for: Single cell RNA sequencing reveals hemocyte heterogeneity in Biomphalaria glabrata: Plasticity over diversity
Source: Front Immunol. 2022 Sep 5;13:956871. doi: 10.3389/fimmu.2022.956871 (PMC9484523; doi:10.3389/fimmu.2022.956871)
Supplement: Supplementary file 7 [file Table_4.xlsx]

## Sheet: Results_CellPop
Supplementary Table 4. List of proteins enriched in each of the morphological hemocyte populations and the genes corresponding to each of the predicted functions of these proteins.
Proteins enriched in population 4: Hyalinocytes
Protein set id	Accession	Description	Genome accession	Protein matches	Sequence Specific		WSC CellPop3/		WSC CellPop4/		WSC CellPop3/		CellPop1				CellPop3				CellPop4					WSC CellPop1/	WSC CellPop1/
			(VectorBase)				WSC CellPop1		WSC CellPop1		WSC CellPop4		Pep	SC	SSC	WSC	Pep	SC	SSC	WSC	Pep	SC	SSC	WSC		WSC CellPop3	WSC CellPop4
23869	A0A182ZPH6_BIOGL	tr|A0A182ZPH6|A0A182ZPH6_BIOGL Fructose-bisphosphate aldolase OS=Biomphalaria glabrata PE=3 SV=1 (fructose-bisphosphate aldolase-like [Biomphalaria glabrata]	BGLB011034		5				CellPop4 only		CellPop4 only										5	5	5	5		#DIV/0!	0
23637	A0A182YWZ6_BIOGL	tr|A0A182YWZ6|A0A182YWZ6_BIOGL Endoglucanase OS=Biomphalaria glabrata PE=3 SV=1 (endoglucanase A-like [Biomphalaria glabrata]	BGLB001404; BGLB001403; BGLB016474; BGLB018122; BGLB011781; BGLB018849; BGLB001401; BGLB009935; BGLB018061; BGLB018121; BGLB009934	yes	3				CellPop4 only		CellPop4 only										3	3	3	3		#DIV/0!	0
23789	A0A182YZS8_BIOGL	tr|A0A182YZS8|A0A182YZS8_BIOGL Uncharacterized protein OS=Biomphalaria glabrata PE=3 SV=1 (heat shock protein 70 A1-like isoform X2 [Biomphalaria glabrata]	BGLB018098; BGLB012438; BGLB004431; BGLB007604; BGLB018062; BGLB007783; BGLB008248; BGLB013785; BGLB013335; BGLB000518	yes	2				CellPop4 only		CellPop4 only		1	1	0	0					2	3	3	3		#DIV/0!	0
23348	A0A182ZVA8_BIOGL	tr|A0A182ZVA8|A0A182ZVA8_BIOGL Uncharacterized protein OS=Biomphalaria glabrata PE=3 SV=1 (glyoxylate reductase/hydroxypyruvate reductase-like [Biomphalaria glabrata]	BGLB013066	yes	3		CellPop3 only		CellPop4 only		0.333333						1	1	1	1	3	3	3	3		0	0
23286	D7QYI0_BIOGL	tr|D7QYI0|D7QYI0_BIOGL Thioester-containing protein 1.1 OS=Biomphalaria glabrata GN=TEP1 PE=2 SV=1	BGLB021854; BGLB031097	yes	7		CellPop1 only		1.64918		CellPop4 only		8	8	4	6.67	4	4	0	0	9	11	5	11		#DIV/0!	0.606364
23551	BB_Locus_10632_Transcript_1/1_Confidence_0.000_Length_1401_5_0-1398	DB <Transcriptome_Biomph_trim_aa.fasta> ( T-complex protein 1 subunit theta-like, partial [Biomphalaria glabrata]	BGLB012564		6		CellPop1 only		1.33333		CellPop4 only		3	3	3	3					4	4	4	4		#DIV/0!	0.75
Proteins enriched in population 3: Blast-like cells
Protein set id	Accession	Description	Genome accession	Protein matches	Sequence Specific		WSC CellPop3/		WSC CellPop4/		WSC CellPop3/		CellPop1				CellPop3				CellPop4					WSC CellPop1/	WSC CellPop1/
			(VectorBase)				WSC CellPop1		WSC CellPop1		WSC CellPop4		Pep	SC	SSC	WSC	Pep	SC	SSC	WSC	Pep	SC	SSC	WSC		WSC CellPop3	WSC CellPop4
23749	A0A182YTZ4_BIOGL	tr|A0A182YTZ4|A0A182YTZ4_BIOGL Uncharacterized protein OS=Biomphalaria glabrata PE=4 SV=1 (ETX-MTX2 / Biomphalysin; aerolysin [Aplysia californica]	BGLB000137; BGLB000033; BGLB000003; BGLB000002; BGLB000119; BGLB000104; BGLB000016; BGLB036275; BGLB000064; BGLB000076; BGLB000125; BGLB040036	yes	5		CellPop3 only		CellPop4 only		1.6		2	2	0	0	5	6	4	5.6	5	5	2	3.5		0	0
23763	A0A1C7D016_BIOGL	tr|A0A1C7D016|A0A1C7D016_BIOGL Uncharacterized protein OS=Biomphalaria glabrata PE=4 SV=1 (tubulin beta chain [Biomphalaria glabrata]	BGLB014447; BGLB012690; BGLB008665; BGLB012283, BGLB008716; BGLB008075; BGLB016724	yes	2		CellPop3 only		CellPop4 only		1.11		5	5	0	0	2	4	2	3.33	4	4	2	3		0	0
23785	A0A182YVC6_BIOGL	tr|A0A182YVC6|A0A182YVC6_BIOGL Uncharacterized protein OS=Biomphalaria glabrata PE=4 SV=1 (haemoglobin type 1 [Biomphalaria glabrata]	BGLB011523; BGLB019194; BGLB017114; BGLB018374; BGLB013367; BGLB012730		7		1.93933		0.285393		6.79528		17	24	3	4.45	15	26	6	8.63	6	14	1	1.27		0.515643	3.50394
23287	B8Y4I7_BIOGL	tr|B8Y4I7|B8Y4I7_BIOGL Thioester-containing protein OS=Biomphalaria glabrata GN=TEP PE=2 SV=1	BGLB021854; BGLB031097		3		2.1021		CellPop1 only		CellPop3 only		6	6	2	3.33	7	7	3	7						0.475714	#DIV/0!
Proteins enriched in population 1: Granulocytes
Protein set id	Accession	Description	Genome accession	Protein matches	Sequence Specific		WSC CellPop3/		WSC CellPop4/		WSC CellPop3/		CellPop1				CellPop3				CellPop4					WSC CellPop1/	WSC CellPop1/
			(VectorBase)				WSC CellPop1		WSC CellPop1		WSC CellPop4		Pep	SC	SSC	WSC	Pep	SC	SSC	WSC	Pep	SC	SSC	WSC		WSC CellPop3	WSC CellPop4
23784	A0A182ZWC2_BIOGL	tr|A0A182ZWC2|A0A182ZWC2_BIOGL Uncharacterized protein OS=Biomphalaria glabrata PE=4 SV=1 (haemoglobin type 2, partial [Biomphalaria glabrata]	BGLB018374; BGLB017114; BGLB011523; BGLB013367; BGLB019194; BGLB012730		2		CellPop1 only		CellPop1 only				29	34	2	29.16					30	38	0	0		#DIV/0!	#DIV/0!
23658	A0A182ZXG9_BIOGL	tr|A0A182ZXG9|A0A182ZXG9_BIOGL Uncharacterized protein OS=Biomphalaria glabrata PE=3 SV=1 (ubiquitin-like modifier-activating enzyme 1 [Biomphalaria glabrata]	BGLB013827; BGLB011911	yes	4		CellPop1 only		CellPop1 only				4	5	5	5										#DIV/0!	#DIV/0!
23562	A0A182ZAK2_BIOGL	tr|A0A182ZAK2|A0A182ZAK2_BIOGL Uncharacterized protein OS=Biomphalaria glabrata PE=4 SV=1 (fatty acid synthase-like [Biomphalaria glabrata]	BGLB006160		6		CellPop1 only		CellPop1 only				6	6	6	6										#DIV/0!	#DIV/0!
23554	A0A182ZHL9_BIOGL	tr|A0A182ZHL9|A0A182ZHL9_BIOGL Tubulin alpha chain OS=Biomphalaria glabrata PE=3 SV=1 (tubulin alpha-1 chain [Biomphalaria glabrata]	BGLB018337; BGLB005353; BGLB004714; BGLB017968; BGLB004715; BGLB000581; BGLB010861; BGLB018317; BGLB005969; BGLB012164; BGLB004978; BGLB008437	yes	2		CellPop1 only		CellPop1 only				5	6	3	5.25	1	1	0	0	1	1	0	0		#DIV/0!	#DIV/0!
23909	BB_Locus_5587_Transcript_1/3_Confidence_0.667_Length_480_3_0-477	DB <Transcriptome_Biomph_trim_aa.fasta> (proteasome subunit alpha type-5 [Aplysia californica]	BGLB016351		3		CellPop1 only		CellPop1 only				3	3	3	3										#DIV/0!	#DIV/0!
23594	BV_Locus_3328_Transcript_4/5_Confidence_0.429_Length_1101_2_0-1062	DB <Transcriptome_Biomph_trim_aa.fasta> (cytochrome b-c1 complex subunit 2, mitochondrial-like [Biomphalaria glabrata]	BGLB034218		3		CellPop1 only		CellPop1 only				3	3	3	3										#DIV/0!	#DIV/0!
23585	cdhitest_out_82553_2_78-1425	DB <Transcriptome_Biomph_trim_aa.fasta> (26S proteasome regulatory subunit 7 [Aplysia californica]	BGLB037931		3		CellPop1 only		CellPop1 only				3	3	3	3										#DIV/0!	#DIV/0!
23495	BV_Locus_37818_Transcript_2/3_Confidence_0.333_Length_1225_6_0-1221	DB <Transcriptome_Biomph_trim_aa.fasta> (bifunctional purine biosynthesis protein PURH-like [Biomphalaria glabrata]	BGLB008997		2		CellPop1 only		CellPop1 only				2	3	3	3										#DIV/0!	#DIV/0!
23464	A0A182YTX9_BIOGL	tr|A0A182YTX9|A0A182YTX9_BIOGL Uncharacterized protein OS=Biomphalaria glabrata PE=3 SV=1 (glutathione S-transferase P 1-like [Biomphalaria glabrata]	BGLB000123		3		CellPop1 only		CellPop1 only				3	3	3	3										#DIV/0!	#DIV/0!
23444	BBVBR_Locus_22472_Transcript_1/1_Confidence_0.000_Length_1270_5_0-1137	DB <Transcriptome_Biomph_trim_aa.fasta> (probable ATP-dependent RNA helicase DDX4 [Biomphalaria glabrata]	BGLB012615		3		CellPop1 only		CellPop1 only				3	3	3	3										#DIV/0!	#DIV/0!
23428	A0A182ZJ31_BIOGL	tr|A0A182ZJ31|A0A182ZJ31_BIOGL Uncharacterized protein OS=Biomphalaria glabrata PE=4 SV=1 (puromycin-sensitive aminopeptidase-like, partial [Biomphalaria glabrata]	BGLB009139		2		CellPop1 only		CellPop1 only				4	4	2	3										#DIV/0!	#DIV/0!
23412	A0A182ZSU4_BIOGL	tr|A0A182ZSU4|A0A182ZSU4_BIOGL Uncharacterized protein OS=Biomphalaria glabrata PE=4 SV=1 (GDP-L-fucose synthase-like [Biomphalaria glabrata]	BGLB012202	yes	3		CellPop1 only		CellPop1 only				3	3	3	3										#DIV/0!	#DIV/0!
23385	BBVBR_Locus_6623_Transcript_1/1_Confidence_0.000_Length_1018_2_0-1017	DB <Transcriptome_Biomph_trim_aa.fasta> (heat shock 70 kDa protein 4 [Aplysia californica]	BGLB013912		3		CellPop1 only		CellPop1 only				3	3	3	3										#DIV/0!	#DIV/0!
23361	A0A182YXL1_BIOGL	tr|A0A182YXL1|A0A182YXL1_BIOGL Uncharacterized protein OS=Biomphalaria glabrata PE=4 SV=1 (methenyltetrahydrofolate synthase domain-containing protein-like [Biomphalaria glabrata]	BGLB001619		3		CellPop1 only		CellPop1 only				3	4	4	4										#DIV/0!	#DIV/0!
23931	A0A182ZJS5_BIOGL	tr|A0A182ZJS5|A0A182ZJS5_BIOGL 60S ribosomal protein L13 OS=Biomphalaria glabrata PE=3 SV=1 (60S ribosomal protein L13-like [Biomphalaria glabrata]	BGLB009383	yes	2		CellPop1 only		0.333333		CellPop4 only		2	3	3	3					1	1	1	1		#DIV/0!	3
23914	cdhitest_out_220216_1_0-1122	DB <Transcriptome_Biomph_trim_aa.fasta> (isocitrate dehydrogenase [NADP], mitochondrial [Aplysia californica]	BGLB005006		4		CellPop1 only		0.333333		CellPop4 only		3	3	3	3					1	1	1	1		#DIV/0!	3
23910	A0A182YZP6_BIOGL	tr|A0A182YZP6|A0A182YZP6_BIOGL Uncharacterized protein OS=Biomphalaria glabrata PE=4 SV=1 (radixin-like [Biomphalaria glabrata]	BGLB002354	yes	2		CellPop1 only		0.333333		CellPop4 only		2	3	3	3					1	1	1	1		#DIV/0!	3
23756	A0A182ZM12_BIOGL	tr|A0A182ZM12|A0A182ZM12_BIOGL Uncharacterized protein OS=Biomphalaria glabrata PE=3 SV=1 (piwi-like protein 1 [Biomphalaria glabrata]	BGLB010170		4		CellPop1 only		0.333333		CellPop4 only		3	3	3	3					1	1	1	1		#DIV/0!	3
23649	BB_Locus_33329_Transcript_1/3_Confidence_0.750_Length_745_4_0-522	DB <Transcriptome_Biomph_trim_aa.fasta> (ubiquitin carboxyl-terminal hydrolase-like [Biomphalaria glabrata]	BGLB033187		3		CellPop1 only		0.333333		CellPop4 only		3	3	3	3					1	1	1	1		#DIV/0!	3
23572	A0A182ZVE3_BIOGL	tr|A0A182ZVE3|A0A182ZVE3_BIOGL Polyadenylate-binding protein OS=Biomphalaria glabrata PE=3 SV=1 (polyadenylate-binding protein 4-like [Biomphalaria glabrata]	BGLB013101	yes	4		CellPop1 only		0.333333		CellPop4 only		3	3	3	3					1	1	1	1		#DIV/0!	3
23534	BV_Locus_15381_Transcript_6/15_Confidence_0.333_Length_501_6_0-498	DB <Transcriptome_Biomph_trim_aa.fasta> (uncharacterized protein LOC106073842, partial [Biomphalaria glabrata]	BGLB037593		3		CellPop1 only		0.333333		CellPop4 only		3	3	3	3					1	1	1	1		#DIV/0!	3
23506	A0A182ZEG6_BIOGL	tr|A0A182ZEG6|A0A182ZEG6_BIOGL Uncharacterized protein OS=Biomphalaria glabrata PE=4 SV=1 (spliceosome RNA helicase DDX39B-like [Biomphalaria glabrata]	BGLB007524	yes	3		CellPop1 only		0.25		CellPop4 only		3	4	4	4					1	1	1	1		#DIV/0!	4
23461	BBVBR_Locus_38681_Transcript_1/1_Confidence_0.000_Length_677_1_0-330	DB <Transcriptome_Biomph_trim_aa.fasta> (proteasome subunit alpha type-6-like [Biomphalaria glabrata]	BGLB011749		2		CellPop1 only		0.333333		CellPop4 only		2	3	3	3					1	1	1	1		#DIV/0!	3
23440	BB_Locus_103676_Transcript_1/1_Confidence_0.000_Length_609_3_33-606	DB <Transcriptome_Biomph_trim_aa.fasta> (peptidyl-prolyl cis-trans isomerase FKBP4-like isoform X2 [Biomphalaria glabrata]	BGLB001060		2		CellPop1 only		0.333333		CellPop4 only		3	3	3	3					1	1	1	1		#DIV/0!	3
23427	W5VR75_BIOGL	tr|W5VR75|W5VR75_BIOGL Puromycin-sensitive aminopeptidase (Fragment) OS=Biomphalaria glabrata PE=2 SV=1 (puromycin-sensitive aminopeptidase, partial [Biomphalaria glabrata]	BGLB033078; BGLB009139		3		CellPop1 only		0.333333		CellPop4 only		4	4	2	3					1	1	1	1		#DIV/0!	3
23418	A0A182ZQG8_BIOGL	tr|A0A182ZQG8|A0A182ZQG8_BIOGL Uncharacterized protein OS=Biomphalaria glabrata PE=3 SV=1 (T-complex protein 1 subunit beta-like [Biomphalaria glabrata]	BGLB011376		3		CellPop1 only		0.222222		CellPop4 only		5	5	3	4.5					1	1	1	1		#DIV/0!	4.5
23390	A0A182ZJG2_BIOGL	tr|A0A182ZJG2|A0A182ZJG2_BIOGL Uncharacterized protein OS=Biomphalaria glabrata PE=4 SV=1 (NAD(P) transhydrogenase, mitochondrial-like [Biomphalaria glabrata]	BGLB009270		4		CellPop1 only		0.333333		CellPop4 only		3	3	3	3					1	1	1	1		#DIV/0!	3
23238	A0A182ZIR7_BIOGL	tr|A0A182ZIR7|A0A182ZIR7_BIOGL Transaldolase OS=Biomphalaria glabrata PE=3 SV=1 (transaldolase-like [Biomphalaria glabrata]	BGLB009025		4		CellPop1 only		0.25		CellPop4 only		4	4	4	4					1	1	1	1		#DIV/0!	4
23208	Bre_Locus_3147_Transcript_2/3_Confidence_0.667_Length_596_6_0-594	DB <Transcriptome_Biomph_trim_aa.fasta> (protein disulfide-isomerase A3-like [Biomphalaria glabrata]	BGLB026491		4		CellPop1 only		0.25		CellPop4 only		4	4	4	4					1	1	1	1		#DIV/0!	4
23877	A0A182Z987_BIOGL	tr|A0A182Z987|A0A182Z987_BIOGL Uncharacterized protein OS=Biomphalaria glabrata PE=3 SV=1 (14-3-3-like protein [Biomphalaria glabrata]	BGLB005695	yes	2		0.3003		CellPop1 only		CellPop3 only		4	4	2	3.33	1	1	1	1	1	1	0	0		3.33	#DIV/0!
23263	BB_Locus_459_Transcript_3/6_Confidence_0.333_Length_1128_2_0-855	DB <Transcriptome_Biomph_trim_aa.fasta> (mammalian ependymin-related protein 1-like [Biomphalaria glabrata]	BGLB029718	yes	2		0.333333		CellPop1 only		CellPop3 only		2	3	3	3	1	1	1	1						3	#DIV/0!
23583	A0A182ZGJ0_BIOGL	tr|A0A182ZGJ0|A0A182ZGJ0_BIOGL Uncharacterized protein OS=Biomphalaria glabrata PE=3 SV=1 (78 kDa glucose-regulated protein [Biomphalaria glabrata]	BGLB008248; BGLB007783; GLB007604; BGLB012438; BGLB004431; BGLB018098; BGLB018062; BGLB013785; BGLB013335		8		0.125		0.5		0.25		7	8	8	8	1	1	1	1	4	4	4	4		8	2
23579	A0A182Z095_BIOGL	tr|A0A182Z095|A0A182Z095_BIOGL Uncharacterized protein OS=Biomphalaria glabrata PE=3 SV=1 (mesocentin-like [Biomphalaria glabrata]	BGLB040200; BGLB001827		8		0.166667		0.5		0.333333		6	6	6	6	1	1	1	1	3	3	3	3		6	2
23577	A0A182YY69_BIOGL	tr|A0A182YY69|A0A182YY69_BIOGL Uncharacterized protein OS=Biomphalaria glabrata PE=3 SV=1 (heat shock protein 83-like [Biomphalaria glabrata]	BGLB001827		8		0.125		0.71375		0.175131		8	8	7	8	1	1	1	1	6	6	5	5.71		8	1.40105
23376	BR_Locus_63914_Transcript_1/1_Confidence_0.000_Length_309_4_3-309	DB <Transcriptome_Biomph_trim_aa.fasta> (hypothetical protein EGW08_004099 [Elysia chlorotica]	BGLB007989		1		CellPop1 only		0.666667		CellPop4 only		2	3	3	3					1	2	2	2		#DIV/0!	1.5
23294	A0A182ZFG8_BIOGL	tr|A0A182ZFG8|A0A182ZFG8_BIOGL Uncharacterized protein OS=Biomphalaria glabrata PE=4 SV=1 (heterogeneous nuclear ribonucleoprotein H-like isoform X2 [Biomphalaria glabrata]	BGLB007876	yes	3		CellPop1 only		0.666667		CellPop4 only		3	3	3	3					2	2	2	2		#DIV/0!	1.5
23233	A0A182ZZ53_BIOGL	tr|A0A182ZZ53|A0A182ZZ53_BIOGL Uncharacterized protein OS=Biomphalaria glabrata PE=3 SV=1 (enolase-like [Biomphalaria glabrata]	BGLB014411		4		CellPop1 only		0.666667		CellPop4 only		3	3	3	3					2	2	2	2		#DIV/0!	1.5
23206	A0A182Z2Q2_BIOGL	tr|A0A182Z2Q2|A0A182Z2Q2_BIOGL Uncharacterized protein OS=Biomphalaria glabrata PE=4 SV=1 (protein Mo25-like [Biomphalaria glabrata]	BGLB003410		3		CellPop1 only		0.666667		CellPop4 only		3	3	3	3					2	2	2	2		#DIV/0!	1.5

## Sheet: Legend
Pep	Number of identified peptides
SC	Spectral Counts : mass spectra allow the identification of peptides belonging to the protein
SSC	Specific Spectral Counts : mass spectra allow the identification of peptides belonging specifically to the protein
WSC	Weighted Spectral Counts : SSC + the weight of unspecific SC (in the case of peptides shared between several proteins)
	Identified only in CellPop3 sample with WSC >= 5 or enrichied at least 10 times in Cellpop3 sample compared to CellPop1 or CellPop4 samples
	Identified only CellPop3 sample with WSC >= 3 or enrichied at least 5 times in CellPop3 sample compared to CellPop1 or CellPop4 samples
	Identified only in CellPop4 sample with WSC >= 5 or enrichied at least 10 times in CellPop4 sample compared to CellPop1 or CellPop3 samples
	Identified only in CellPop4 sample with WSC >= 3 or enrichied at least 5 times in CellPop4 sample compared to CellPop1 or CellPop3 samples
	Identified only in CellPop1 sample with WSC >= 5 or enrichied at least 10 times in CellPop1 sample compared to CellPop3 or CellPop4 samples
	Identified only in CellPop1 sample with WSC >= 3 or enrichied at least 5 times in CellPop1 sample compared to CellPop 3 or CellPop4 samples
Pvalue des liste de gene vector base classée pour les gene avec une e-value de 0.0 et en fonction du score d'alignement dans un ordre décroissant
